# Supplementary material for: Late Paleolithic whale bone tools reveal human and whale ecology in the Bay of Biscay
Source: Springer Nature journal article supplement (doi:10.1038/s41467-025-59486-8), 2025-05-27
Supplement: MOESM1 [file 41467_2025_59486_MOESM1_ESM.pdf]

## Supplementary Information for “Late Paleolithic whale bone tools reveal human and whale ecology in the Bay of Biscay”

Krista McGrath<sup>1α</sup>, Laura G. van der Sluis<sup>2,3α</sup>, Alexandre Lefebvre<sup>4,5</sup>, Anne Charpentier<sup>6</sup>, Ana Rodrigues<sup>6</sup>, Esteban Álvarez-Fernández<sup>7</sup>, François Baleux<sup>8</sup>, Eduardo Berganza<sup>9</sup>, François-Xavier Chauvière<sup>10</sup>, Morgane Dachary<sup>8,11</sup>, Elsa Duarte Matías<sup>12</sup>, Claire Houmard<sup>13</sup>, Ana B. Marín-Arroyo<sup>4</sup>, Marco de la Rasilla Vives<sup>12</sup>, Jesus Tapia<sup>9</sup>, François Thil<sup>14</sup>, Olivier Tombret<sup>2</sup>, Leire Torres-Iglesias<sup>4</sup>, Camilla Speller<sup>15</sup>, Antoine Zazzo<sup>2</sup> & Jean-Marc Pétilion<sup>8\*</sup>

<sup>α</sup> These authors contributed equally.

\* Corresponding author: jean-marc.petillon@cnrs.fr

<sup>1</sup>Department of Prehistory and Institute of Environmental Science and Technology (ICTA), Universidad Autònoma de Barcelona, Bellaterra, Spain. <sup>2</sup>BioArchéologie, Interactions Sociétés Environnements (BioArch), UMR 7209, Muséum national d'Histoire naturelle, CNRS, Paris, France. <sup>3</sup>Department of Evolutionary Anthropology, University of Vienna, Vienna, Austria. Human Evolution and Archaeological Sciences (HEAS), Vienna, Austria. <sup>4</sup>Grupo I+D+i EVOADAPTA, Universidad de Cantabria, Santander, Spain. <sup>5</sup>De la Préhistoire à l'Actuel : Culture, Environnement et Anthropologie (PACEA), UMR 5199, CNRS, Université de Bordeaux, Pessac, France. <sup>6</sup>CEFE, Univ Montpellier, CNRS, EPHE, IRD, Montpellier, France. <sup>7</sup>GIR PREHUSAL, Universidad de Salamanca, Facultad de Geografía e Historia, Departamento de Prehistoria, Historia Antigua y Arqueología, Salamanca, Spain. <sup>8</sup>Travaux et Recherches Archéologiques sur les Cultures, les Espaces et les Sociétés (TRACES) UMR 5608, CNRS, Université Toulouse Jean Jaurès, Toulouse, France. <sup>9</sup>Sociedad de Ciencias Aranzadi, Donostia-San Sebastian, Spain. <sup>10</sup>Office du patrimoine et de l'archéologie du canton de Neuchâtel, section Archéologie, Laténium, Hauterive, Switzerland. <sup>11</sup>Ministère de la Culture, Service Régional de l'Archéologie de Nouvelle-Aquitaine, Limoges, France. <sup>12</sup>Departamento de Historia, Universidad de Oviedo, Oviedo, Spain. <sup>13</sup>Université de Franche-Comté, UMR 6249 Chrono-environnement, Besançon, France. <sup>14</sup>Laboratoire des Sciences du Climat et de l'Environnement (LSCE/IPSL), UMR 8212, CEA-CNRS-UVSQ, Université Paris Saclay, Gif-sur-Yvette, France. <sup>15</sup>Department of Anthropology, University of British Columbia, Vancouver, Canada.

### **This pdf file includes:**

- Supplementary Figures 1 through 102.
- Supplementary Discussion: Comparing stable isotope signatures in Paleolithic versus modern whales
- Supplementary References: references cited in the captions of Supplementary Figures 99 through 102, or in the Supplementary Discussion.

## **Supplementary Figures 1 through 90: Catalogue.**

This catalogue includes the pictures of:

- All the worked objects whose identification as whale bone was confirmed by ZooMS, except: study numbers 590, 625 and 629, whose pictures could not be taken at the museum; study numbers 993, 994 and AN2 25/83-73 N17, published in other articles (Langley and Street 2013; Lucas et al. 2023).

- A sample of 26 unworked whale bone fragments from Santa Catalina, with a priority given to those that have an individual excavation number (as opposed to those found during screening, identified only through their spit number), and that were both analyzed with ZooMS and radiocarbon-dated.

Unless otherwise stated, the scale is 1:1, and the pictures were taken before sampling.

All pictures by A. Lefebvre and J.-M. Pétillon.



### Supplementary Figure 1

Study number: 2

Museum number: MAN 77159I9, I E omega 1920

Site and layer: Isturitz, salle de Saint-Martin, SI/E omega

Typology: projectile point

ZooMS ID: Cetacean + cow glue contamination

<sup>14</sup>C date: none

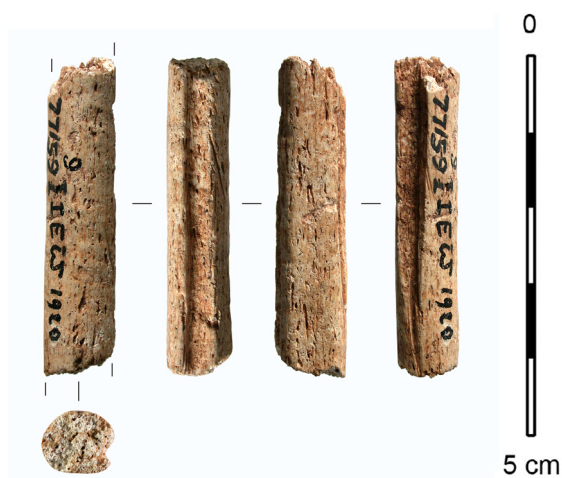

### Supplementary Figure 2

Study number: 4

Museum number: MAN 77159I6, I E St alpha 1914

Site and layer: Isturitz, Grande Salle, II/E

Typology: projectile point

ZooMS ID: Sperm whale

<sup>14</sup>C date: MUSE21043, 14260 ± 60 BP, 17268-16703 cal BP

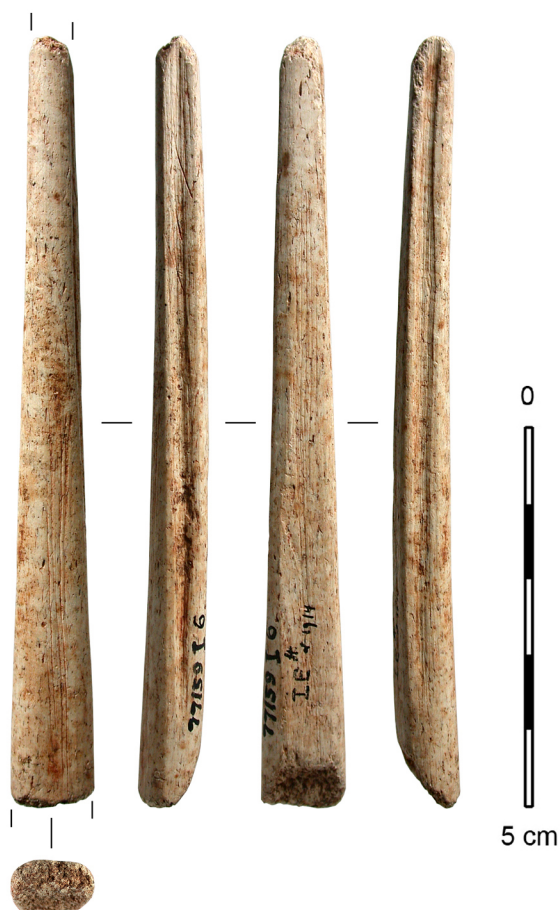

### Supplementary Figure 3

Study number: 6

Museum number: MAN Ist I (S) 1928, C2RMF: A

Site and layer: Isturitz, salle de Saint-Martin, SI/E omega

Typology: projectile point with massive base

ZooMS ID: Right whale / Bowhead whale

$^{14}\text{C}$  date: MUSE21044,  $14290 \pm 60$  BP, 17299-16746 cal BP

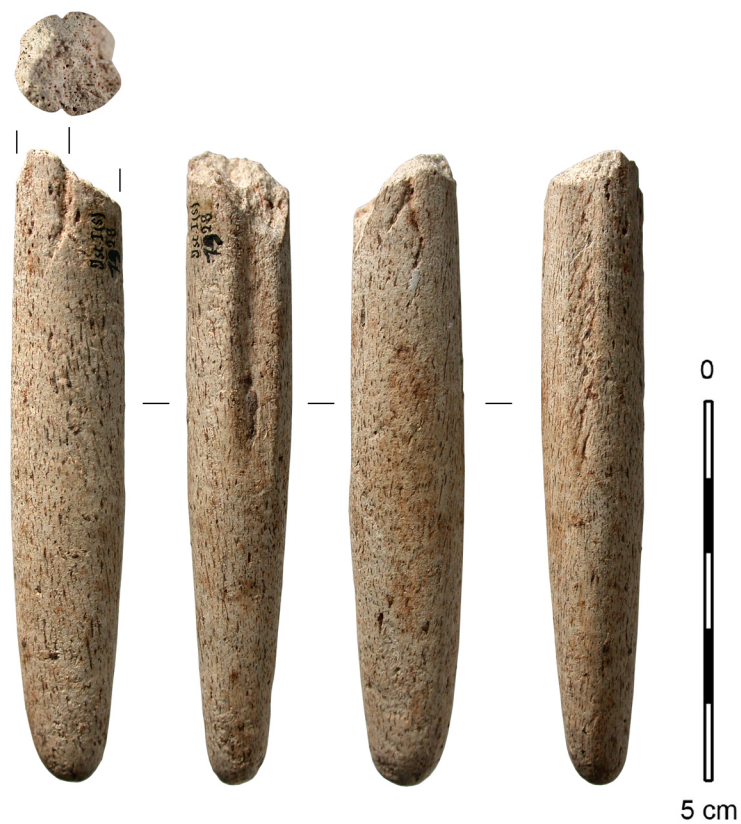

#### Supplementary Figure 4

Study number: 7

Museum number: MAN Ist SI 1929, C2RMF: K

Site and layer: Isturitz, salle de Saint-Martin, SI/E omega

Typology: wedge

ZooMS ID: Cetacean + cow glue contamination

<sup>14</sup>C date: none

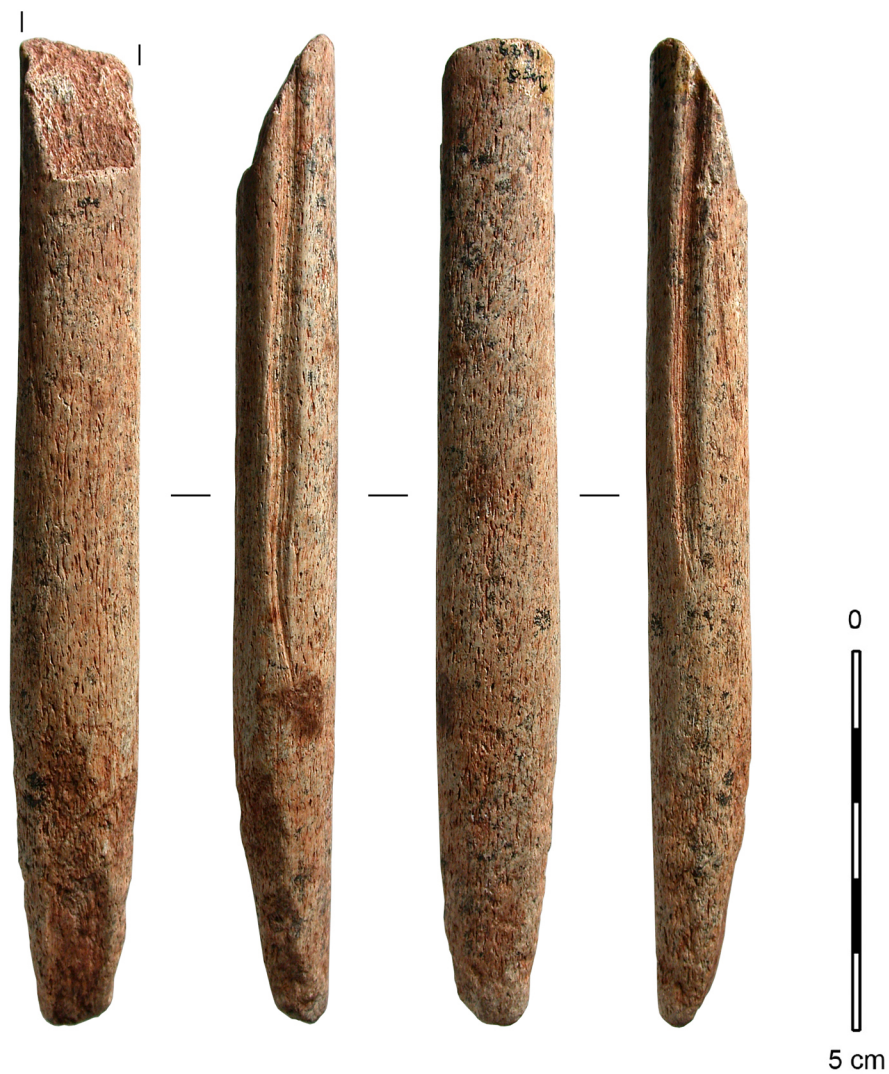

### Supplementary Figure 5

Study number: 10

Museum number: MAN Ist II 1931

Site and layer: Isturitz, Grande Salle, II/E

Typology: projectile point

ZooMS ID: Sperm whale + cow glue contamination

<sup>14</sup>C date: none

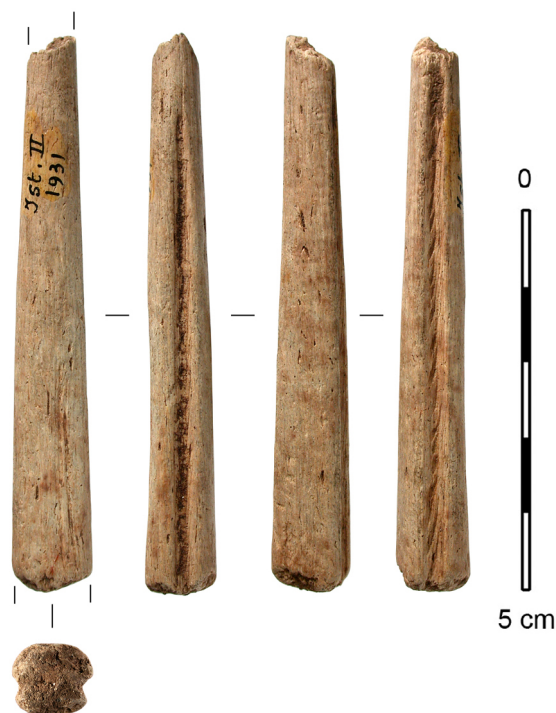

### Supplementary Figure 6

Study number: 13

Museum number: MAN 77158A121

Site and layer: Isturitz, Grande Salle, II/E?

Typology: projectile point with massive base

ZooMS ID: Sperm whale

<sup>14</sup>C date: MUSE21045, 15110 ± 70 BP, 18248-17742 cal BP

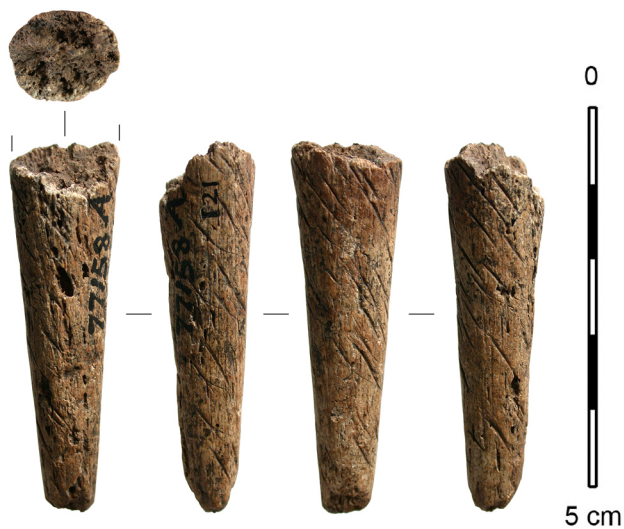

# Supplementary Figure 7

Study number: 14

Museum number: MAN Ist II 1932

Site and layer: Isturitz, Grande Salle, II/E

Typology: projectile point with massive base

ZooMS ID: Sperm whale + cow glue contamination

<sup>14</sup>C date: none

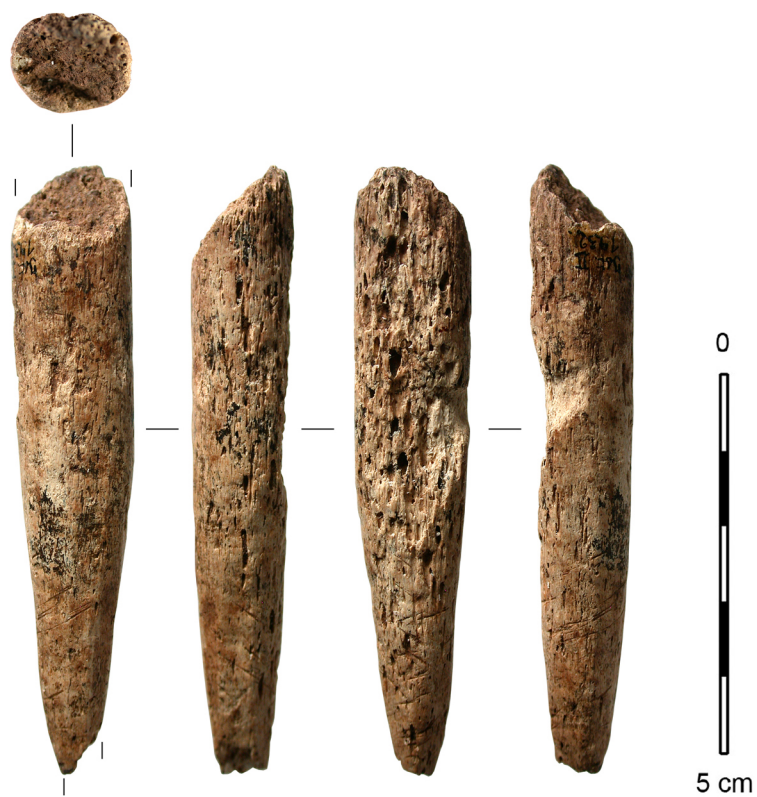



### Supplementary Figure 8

Study number: 15

Museum number: MAN 77153A5, IE alpha 1914

Site and layer: Isturitz, Grande Salle, II/E

Typology: projectile point with massive base

ZooMS ID: Blue whale

$^{14}\text{C}$  date: MUSE21046,  $15530 \pm 80$  BP, 18718-18198 cal BP

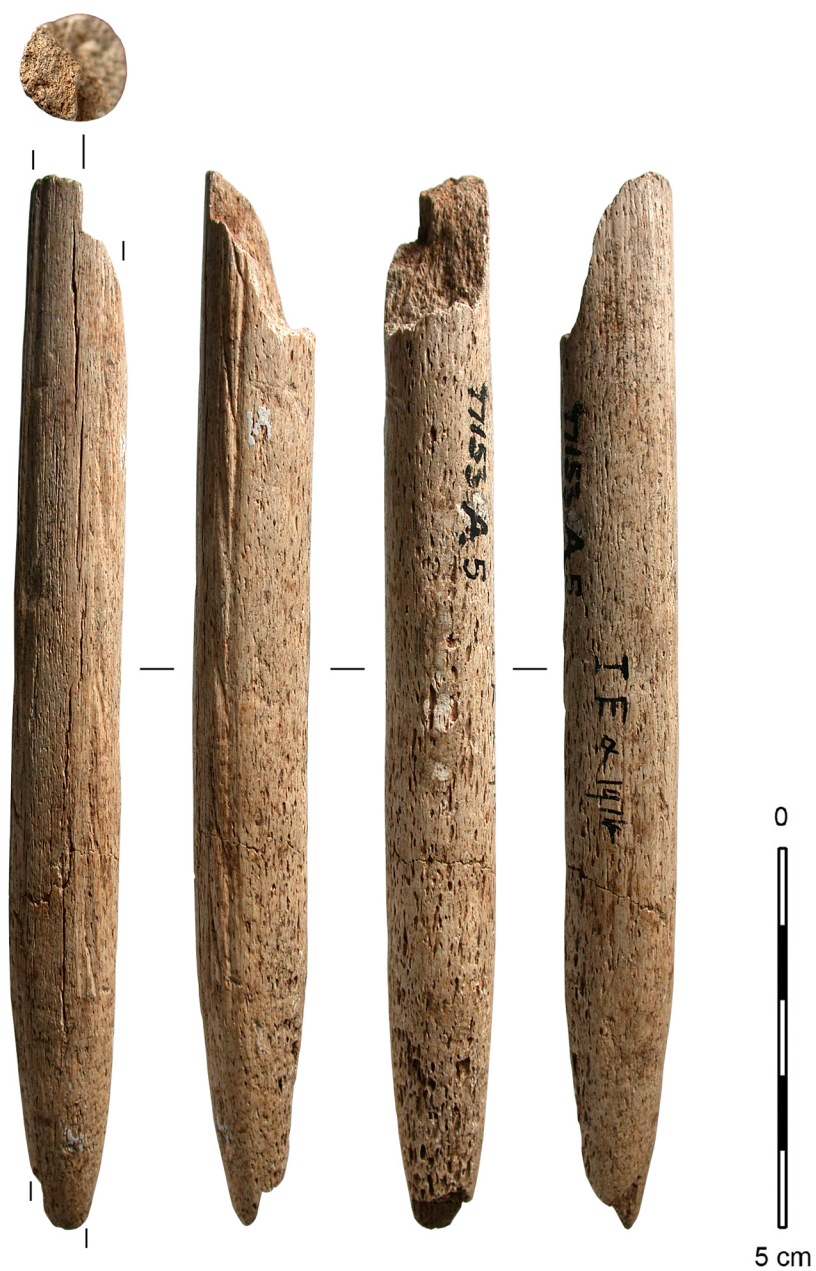

### Supplementary Figure 9

Study number: 19

Museum number: MAN Ist SI 1929, C2RMF: J

Site and layer: Isturitz, salle de Saint-Martin, SI/E omega

Typology: object on splinter

ZooMS ID: Cetacean + cow glue contamination

<sup>14</sup>C date: none

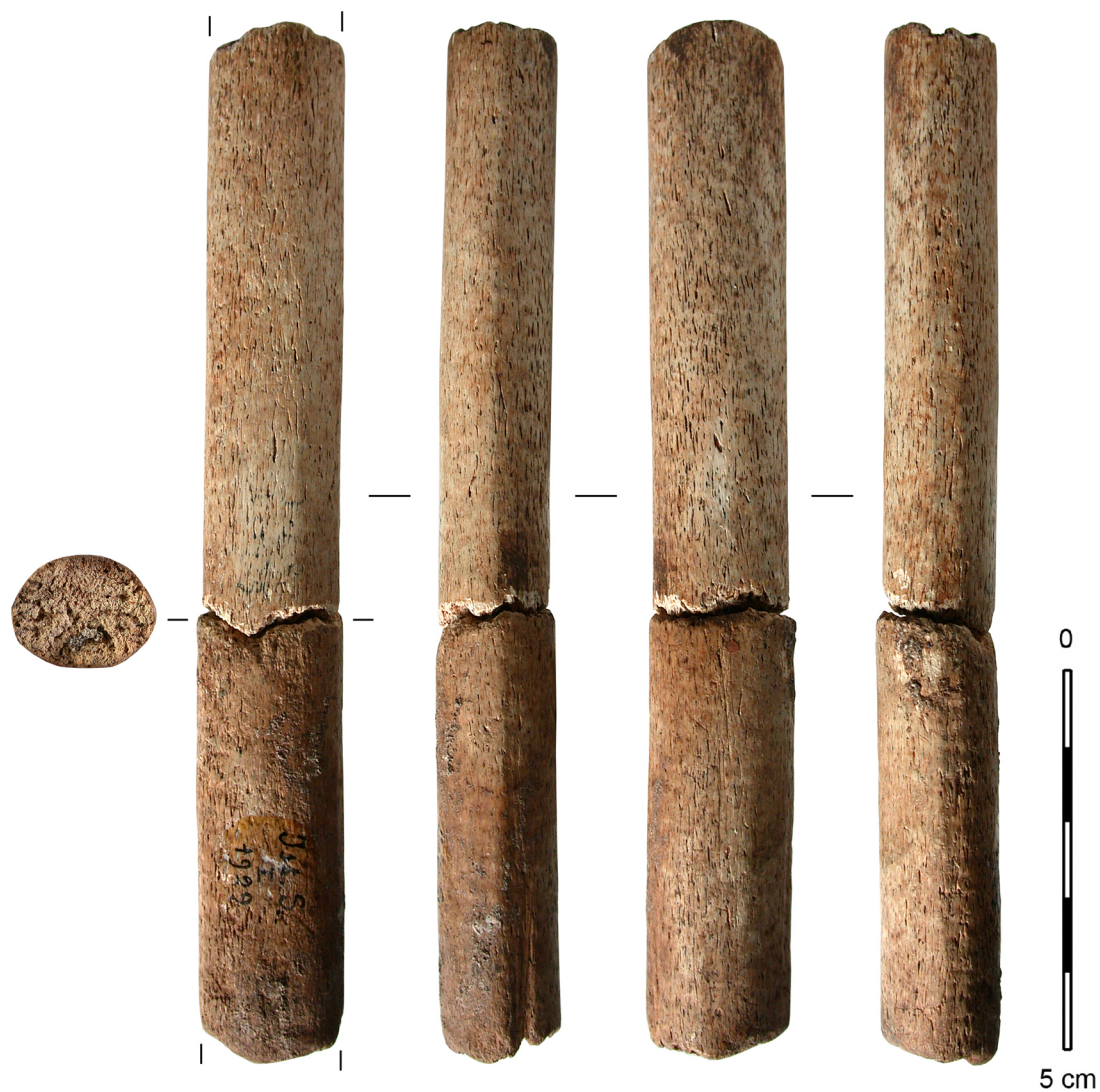

# Supplementary Figure 10

Study number: 36

Museum number: MAN 77158B132

Site and layer: Isturitz, Grande Salle, II/E?

Typology: projectile point

ZooMS ID: Right whale / Bowhead whale

<sup>14</sup>C date: MUSE21047, 14250 ± 60 BP, 17256-16688 cal BP

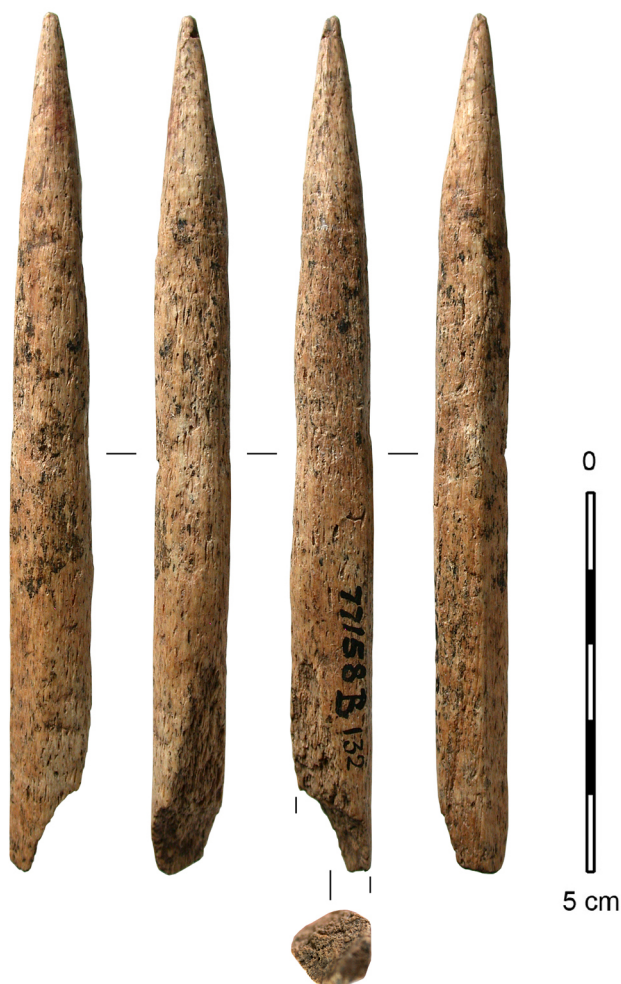



### Supplementary Figure 11

Study number: 38

Museum number: MAN Ist II 1934

Site and layer: Isturitz, Grande Salle, II/E

Typology: projectile point with massive base

ZooMS ID: Sperm whale + cow glue contamination

$^{14}\text{C}$  date: none

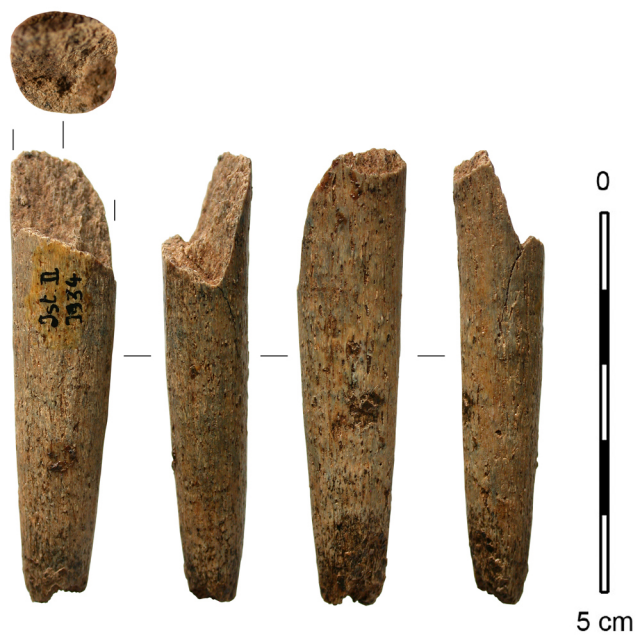

### Supplementary Figure 12

Study number: 39

Museum number: MAN Ist II 1937

Site and layer: Isturitz, Grande Salle, II/E

Typology: projectile point with massive base

ZooMS ID: Fin whale + cow glue contamination

$^{14}\text{C}$  date: none

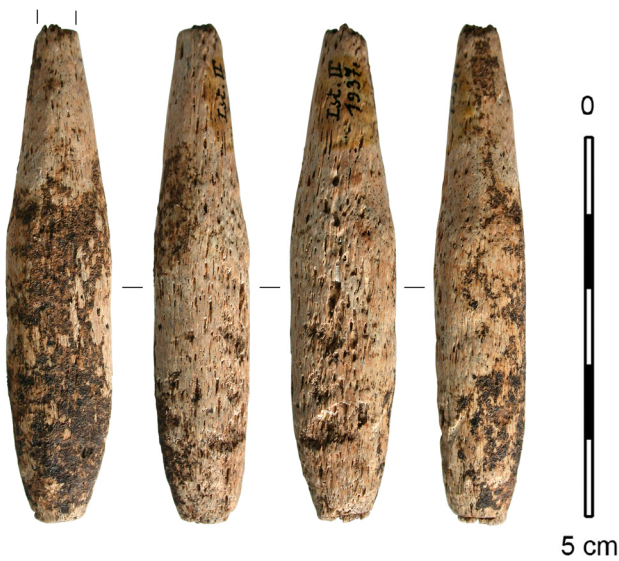

### Supplementary Figure 13

Study number: 58

Museum number: Ist GD 2007 déblais paroi est, A

Site and layer: Isturitz, salle de Saint-Martin, GD C2

Typology: projectile point

ZooMS ID: Gray whale

<sup>14</sup>C date: MUSE21048, failed

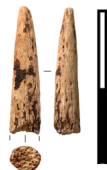

### Supplementary Figure 14

Study number: 59

Museum number: Ist GD 2008 B4, B

Site and layer: Isturitz, salle de Saint-Martin, GD C2

Typology: projectile point

ZooMS ID: Fin whale

<sup>14</sup>C date: MUSE21049, failed

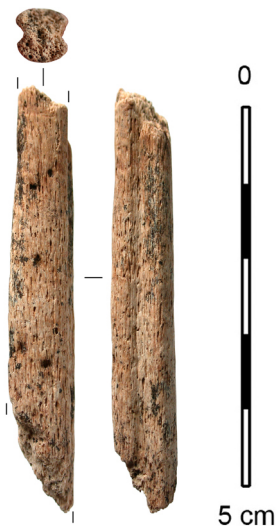

### Supplementary Figure 15

Study number: 60

Museum number: Ist GD 2009 B3

Site and layer: Isturitz, salle de Saint-Martin, GD C2

Typology: projectile point

ZooMS ID: Cetacean (Sperm whale?)

<sup>14</sup>C date: MUSE21050, failed

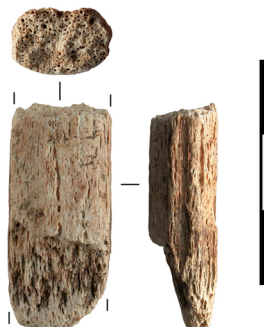

# **Supplementary Figure 16**

Study number: 82

Museum number: Ist GD 2010 B5

Site and layer: Isturitz, salle de Saint-Martin, GD C2

Typology: projectile point

ZooMS ID: Sperm whale

<sup>14</sup>C date: MUSE21051, failed

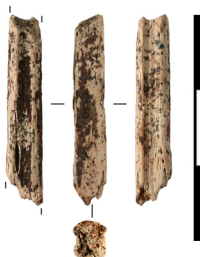

**Supplementary Figure 17**

Study number: 589

Museum number: MAN 77163G113 + 77162E20, IF1 (on fgt 77162E20)

Site and layer: Isturitz, Grande Salle, I/F1

Typology: foreshaft

ZooMS ID: Fin whale

<sup>14</sup>C date: MUSE 21058, 13820 ± 60 BP, 16729-16144 cal BP

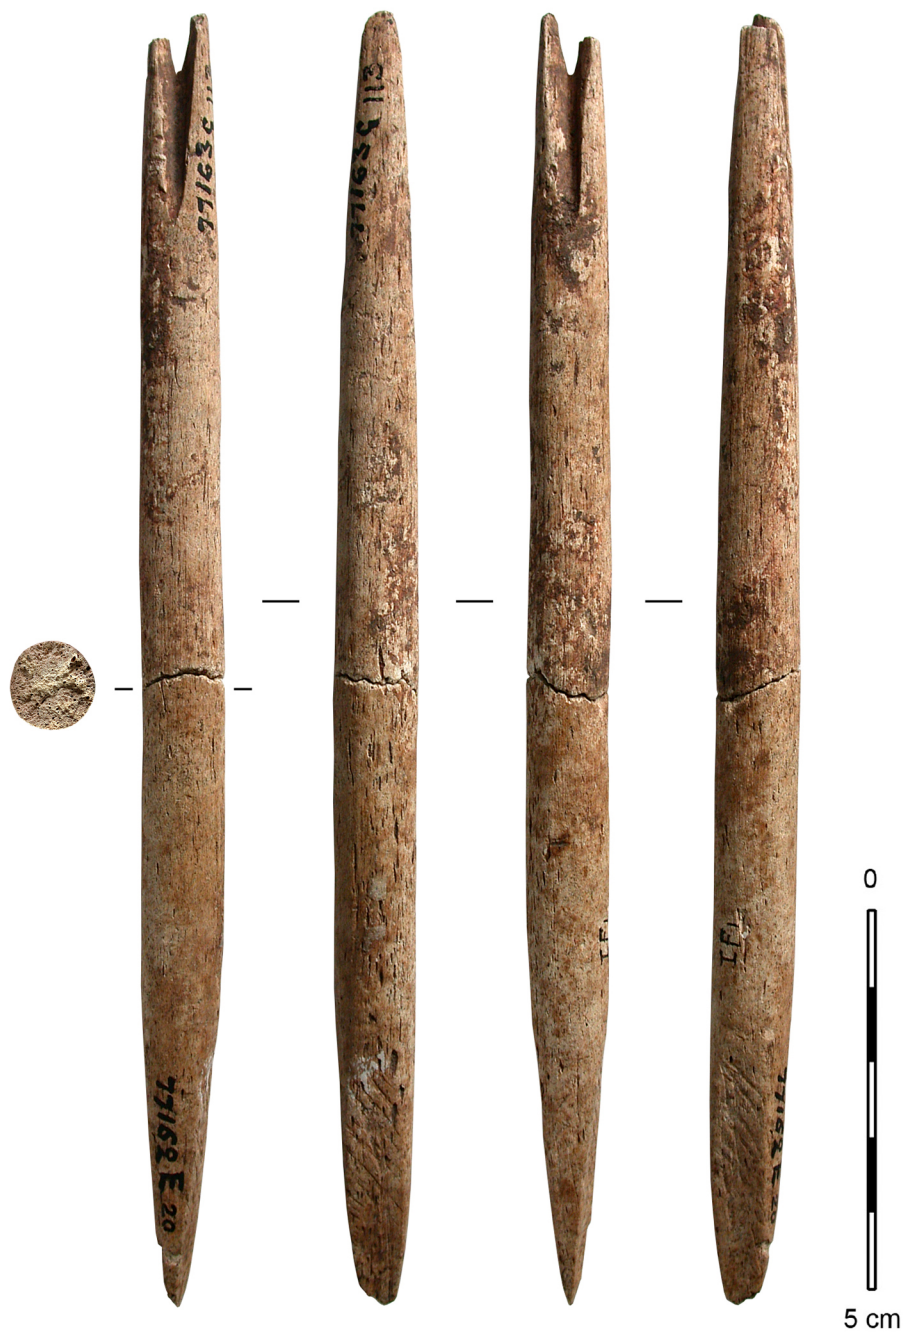

### Supplementary Figure 18

Study number: 630

Museum number: MAN Ist II 1931 + Ist II 1931

Site and layer: Isturitz, Grande Salle, II/E

Typology: foreshaft

ZooMS ID: Sperm whale + cow glue contamination

$^{14}\text{C}$  date: none

(scale 1:2)

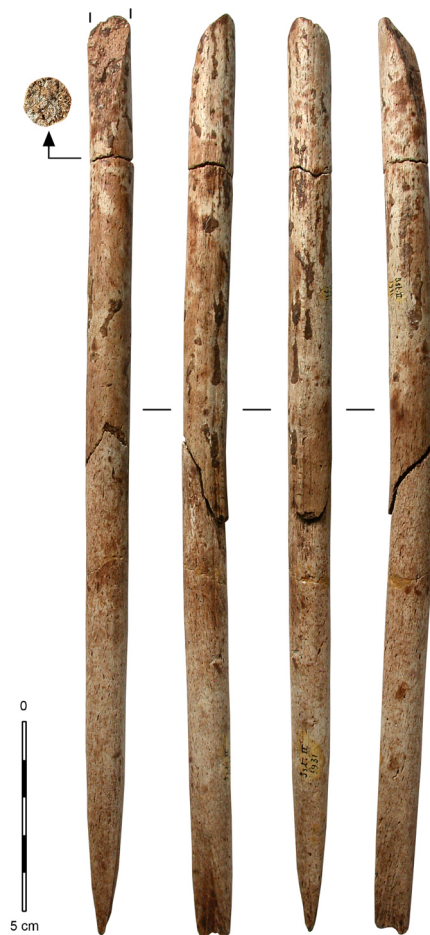

### Supplementary Figure 19

Study number: 634

Museum number: MAN 77158B362 + 77158B18

Site and layer: Isturitz, Grande Salle, II/E?

Typology: foreshaft

ZooMS ID: Sperm whale + cow glue contamination

<sup>14</sup>C date: none

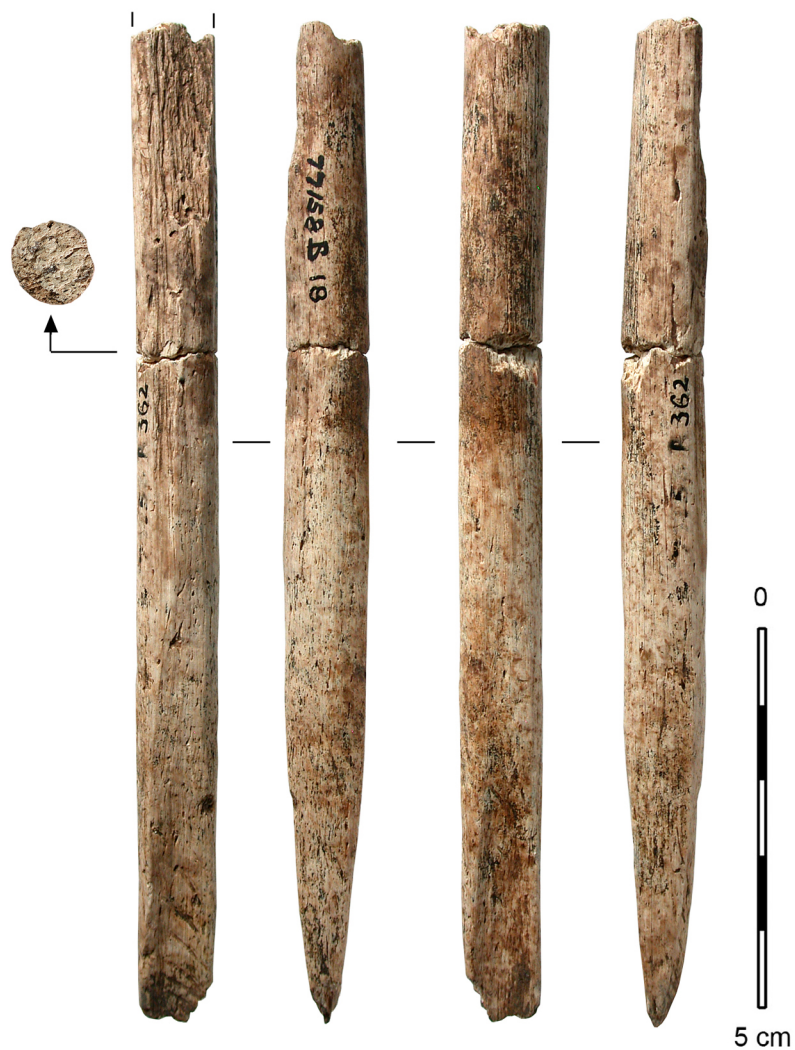



# Supplementary Figure 20

Study number: 637

Museum number: MAN 77159D10, IE 1914

Site and layer: Isturitz, Grande Salle, II/E

Typology: foreshaft

ZooMS ID: Sperm whale + cow glue contamination

<sup>14</sup>C date: none

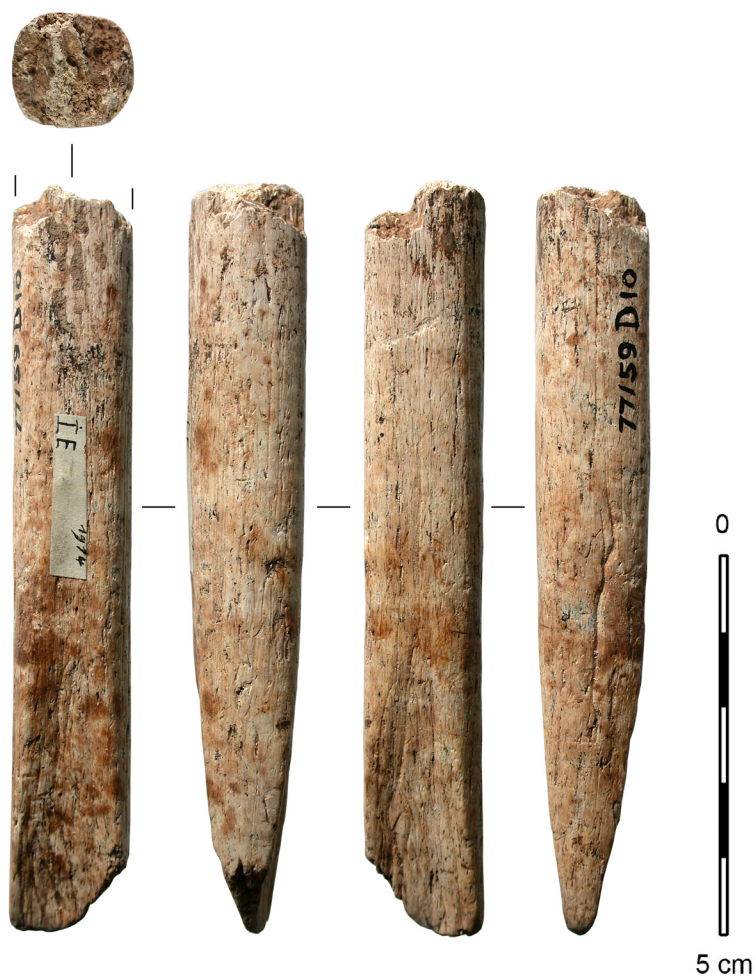

### Supplementary Figure 21

Study number: 749

Museum number: MAN Ist II 1930 + Ist I 1930

Site and layer: Isturitz, Grande Salle, I/F1 + II/E

Typology: object on splinter

ZooMS ID: Fin whale + cow glue contamination

<sup>14</sup>C date: none

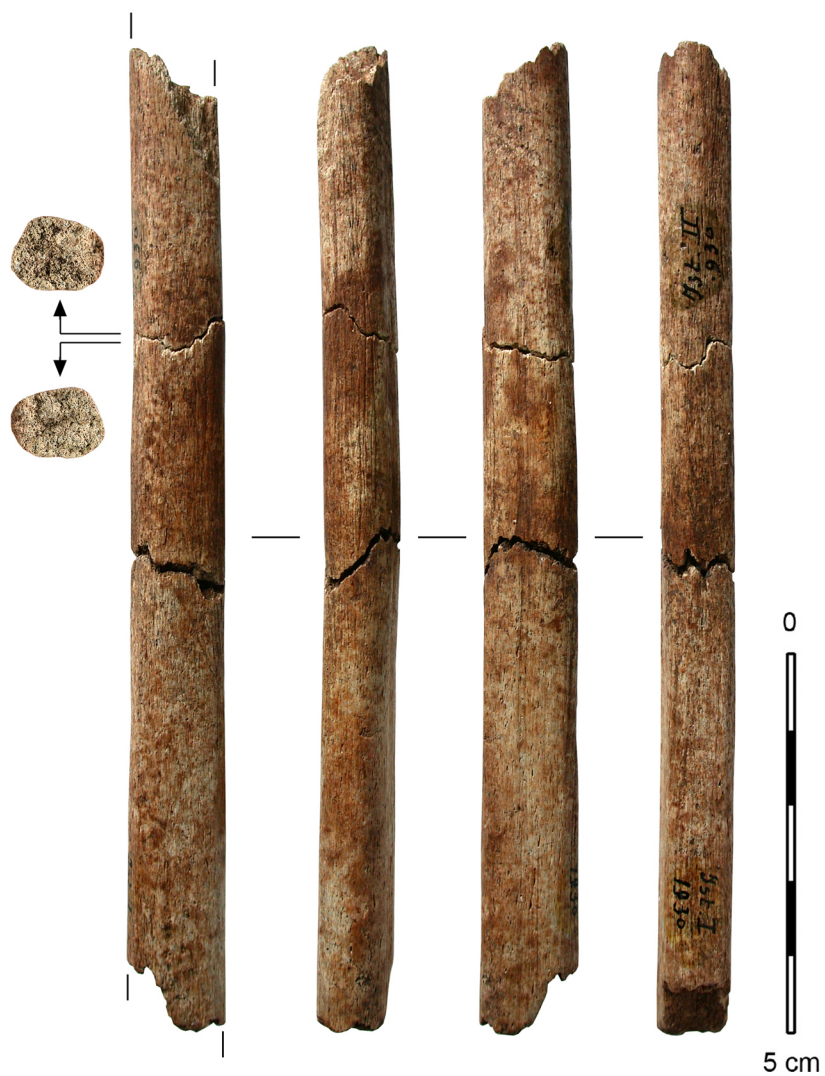



# Supplementary Figure 22

Study number: 780

Museum number: MAN Ist I 1930

Site and layer: Isturitz, Grande Salle, I/F1

Typology: wedge

ZooMS ID: Sperm whale + cow glue contamination

<sup>14</sup>C date: none

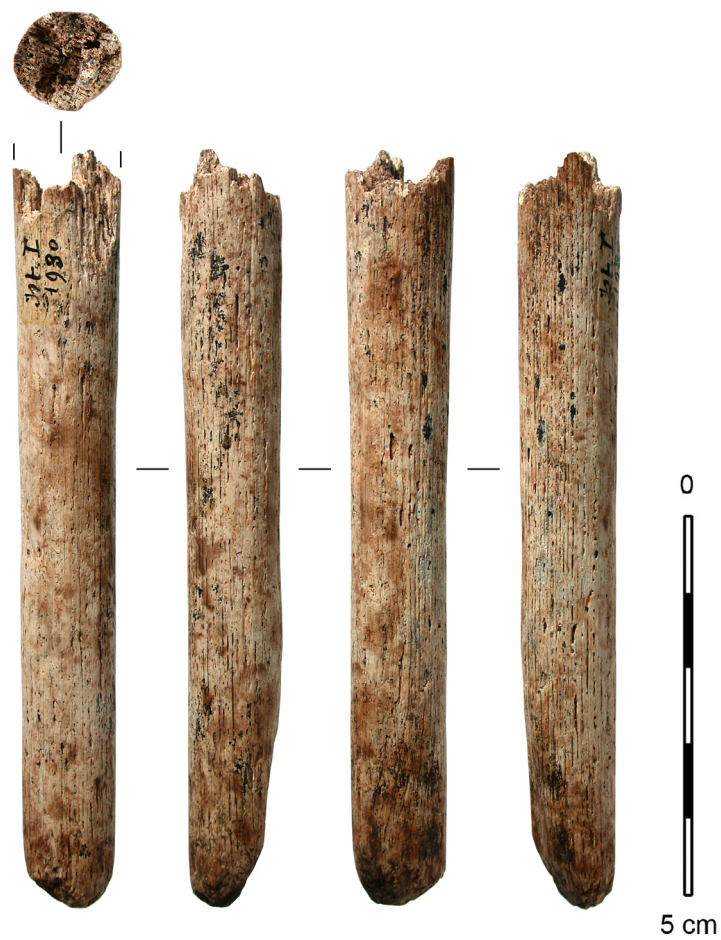

### Supplementary Figure 23

Study number: 781

Museum number: MHNT

Site and layer: Isturitz

Typology: projectile point

ZooMS ID: Sperm whale

$^{14}\text{C}$  date: MUSE 21054,  $14430 \pm 60$  BP, 17446-16911 cal BP

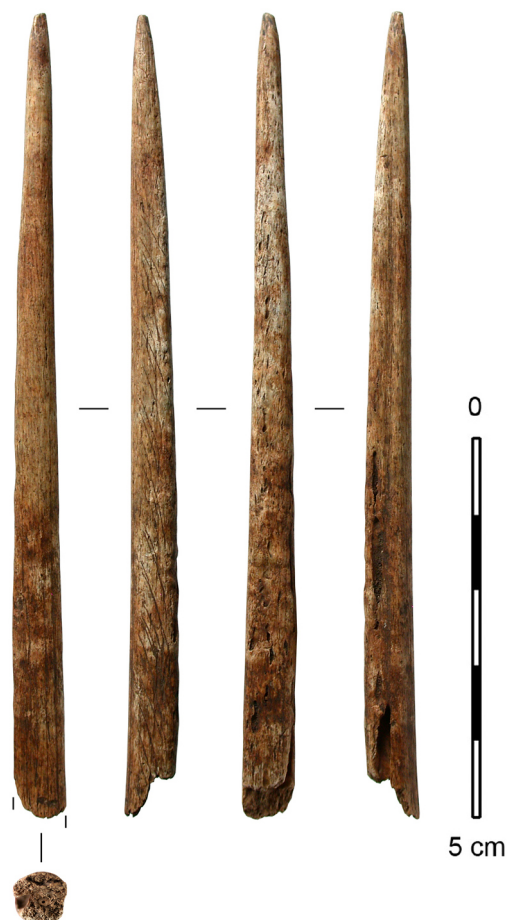

### Supplementary Figure 24

Study number: 783

Museum number: MAN 83642 + 83643, F28/29 + K69

Site and layer: Vache 3 & 4

Typology: unidentified

ZooMS ID: Right whale / Bowhead whale

$^{14}\text{C}$  date: MUSE20137,  $14100 \pm 60$  BP, 17046-16501 cal BP

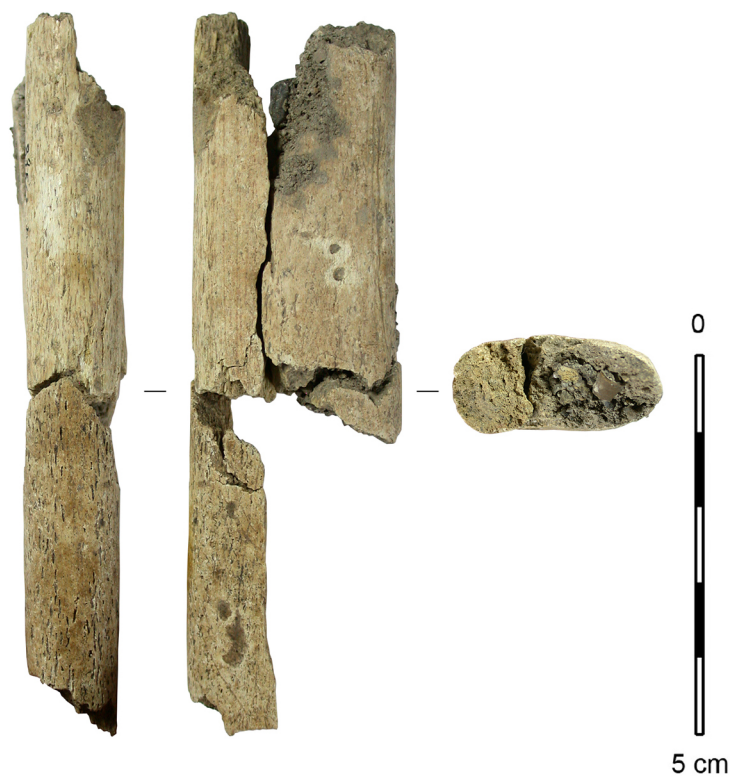

### Supplementary Figure 25

Study number: 785

Museum number: MAN 83643, F8

Site and layer: Vache 4

Typology: wedge

ZooMS ID: Right whale / Bowhead whale

$^{14}\text{C}$  date: MUSE 20138,  $14020 \pm 60$  BP, 16967-16402 cal BP

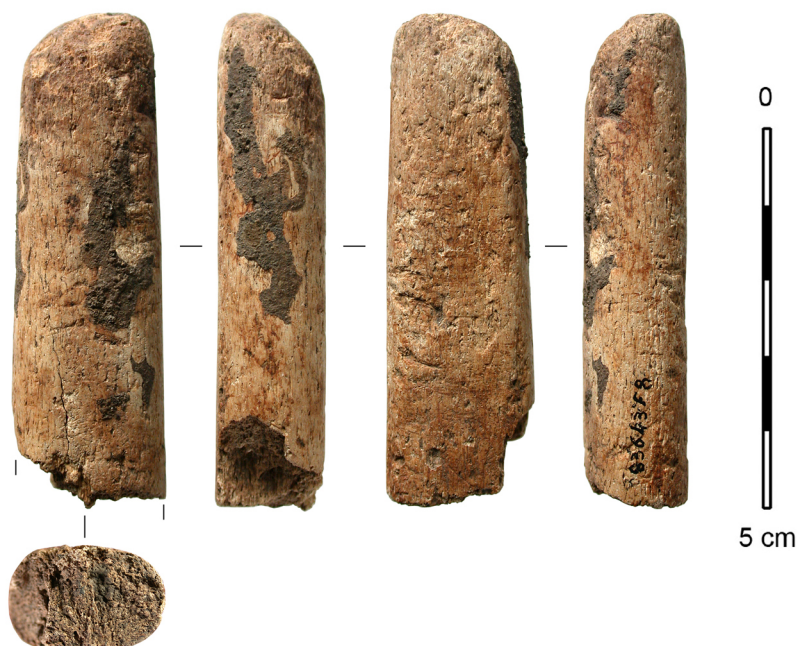

# Supplementary Figure 26

Study number: 798

Museum number: MAN 56719, C2RMF: H1

Site and layer: Saint-Michel

Typology: projectile point with massive base

ZooMS ID: Right whale / Bowhead whale

<sup>14</sup>C date: MUSE20139, 14620 ± 60 BP, 17744-17114 cal BP

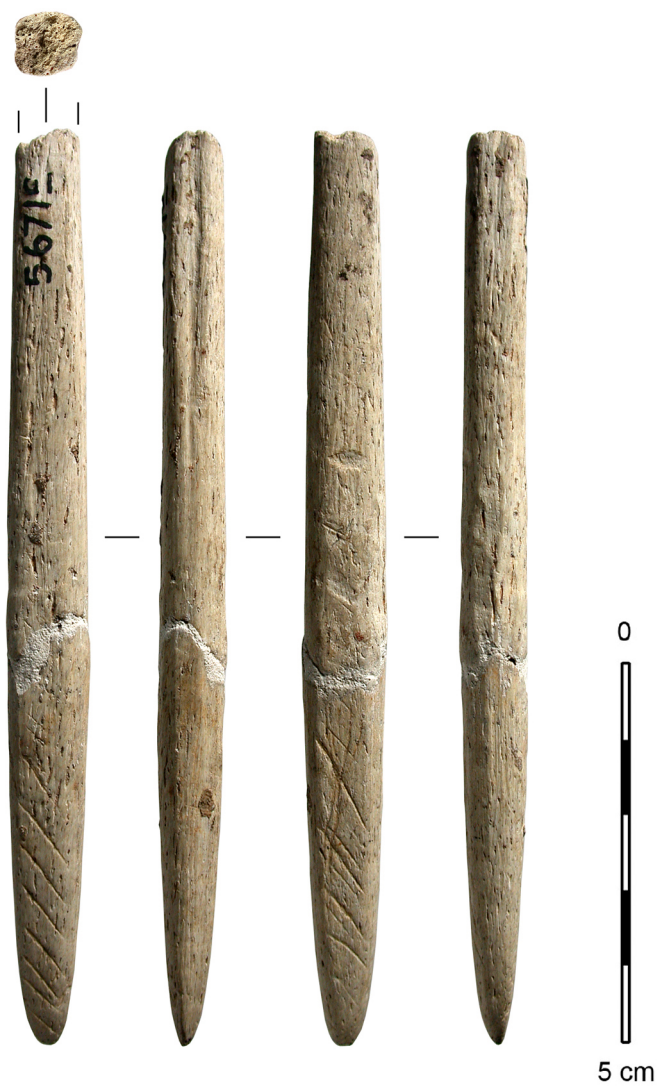

**Supplementary Figure 27**

Study number: 799

Museum number: MAN 56410, B

Site and layer: Saint-Michel

Typology: unidentified

ZooMS ID: Sperm whale

$^{14}\text{C}$  date: MUSE21042,  $14450 \pm 60$  BP, 17477-16930 cal BP

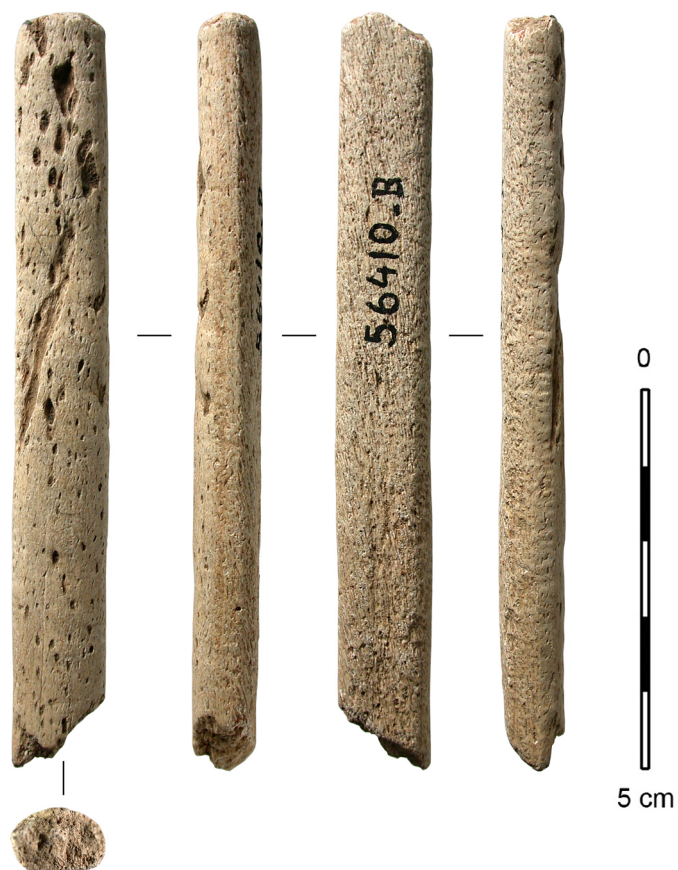



# Supplementary Figure 28

Study number: 815

Museum number: MH 55.33.9.1

Site and layer: Tuc d'Audoubert

Typology: foreshaft

ZooMS ID: Sperm whale

<sup>14</sup>C date: none

(scale 1:2)

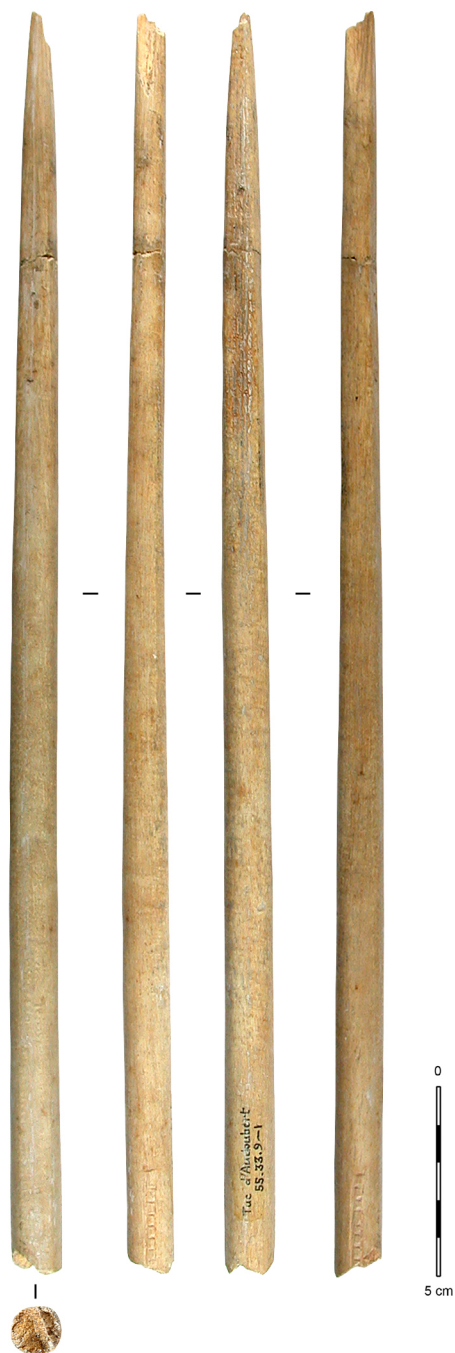

**Supplementary Figure 29**

Study number: 816

Museum number: MHNT 17

Site and layer: Mas d'Azil

Typology: blank?

ZooMS ID: Sperm whale

<sup>14</sup>C date: MUSE20131, 14440 ± 90 BP, 17532-16875 cal BP

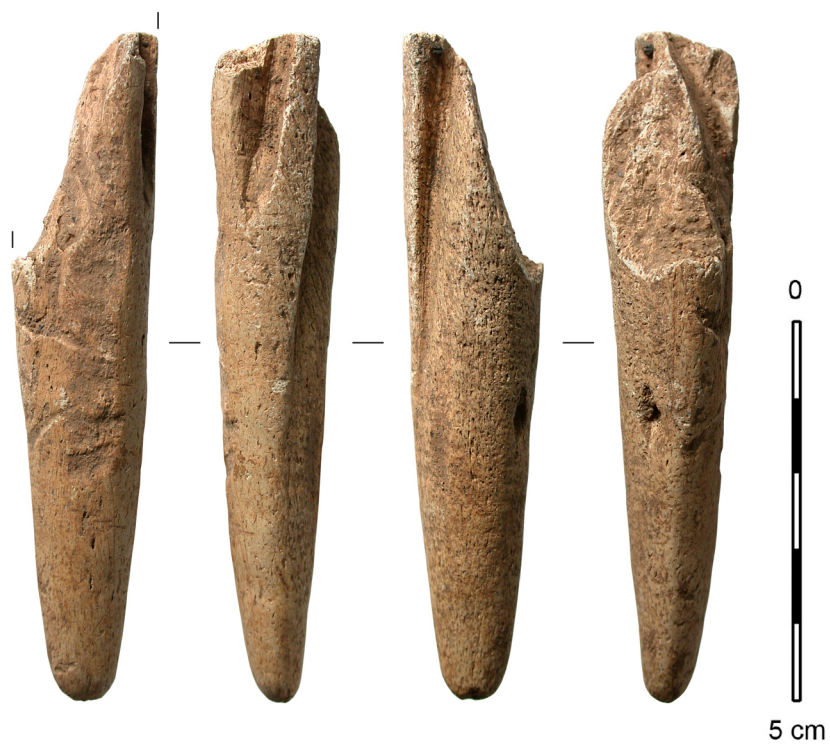

### Supplementary Figure 30

Study number: 817

Museum number: MHNT MAZ 99.23.24

Site and layer: Mas d'Azil

Typology: projectile point with massive base

ZooMS ID: Sperm whale

$^{14}\text{C}$  date: MUSE21038,  $14040 \pm 60$  BP, 16987-16428 cal BP

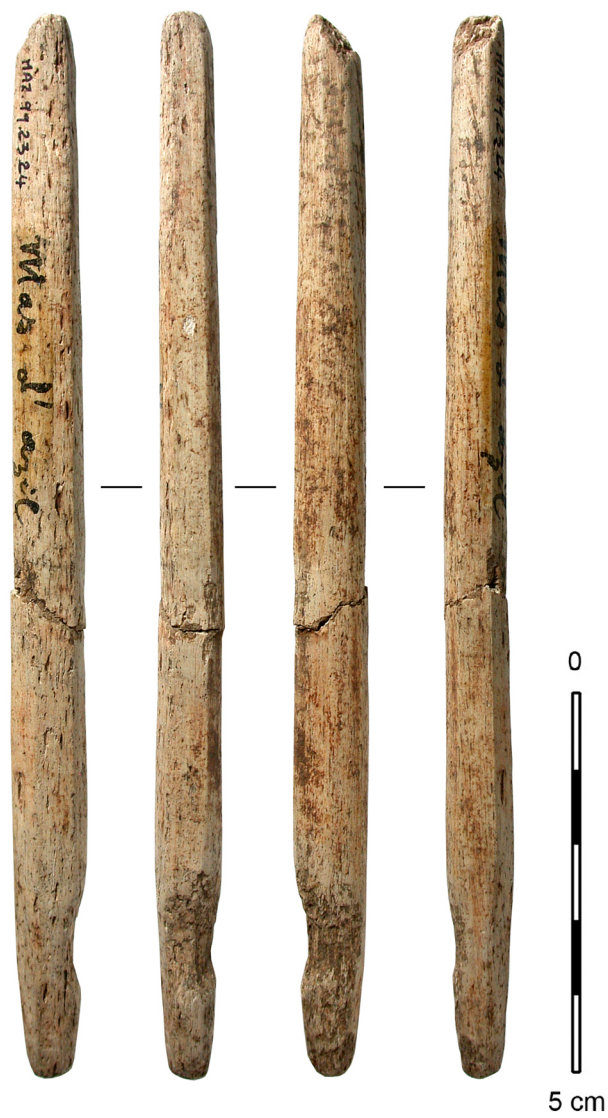



**Supplementary Figure 31**

Study number: Hum5

Museum number: 3945

Site and layer: Mas d'Azil

Typology: unidentified

ZooMS ID: Sperm whale

$^{14}\text{C}$  date: R00215.1,  $14240 \pm 190$  BP, 16388-17462 cal BP

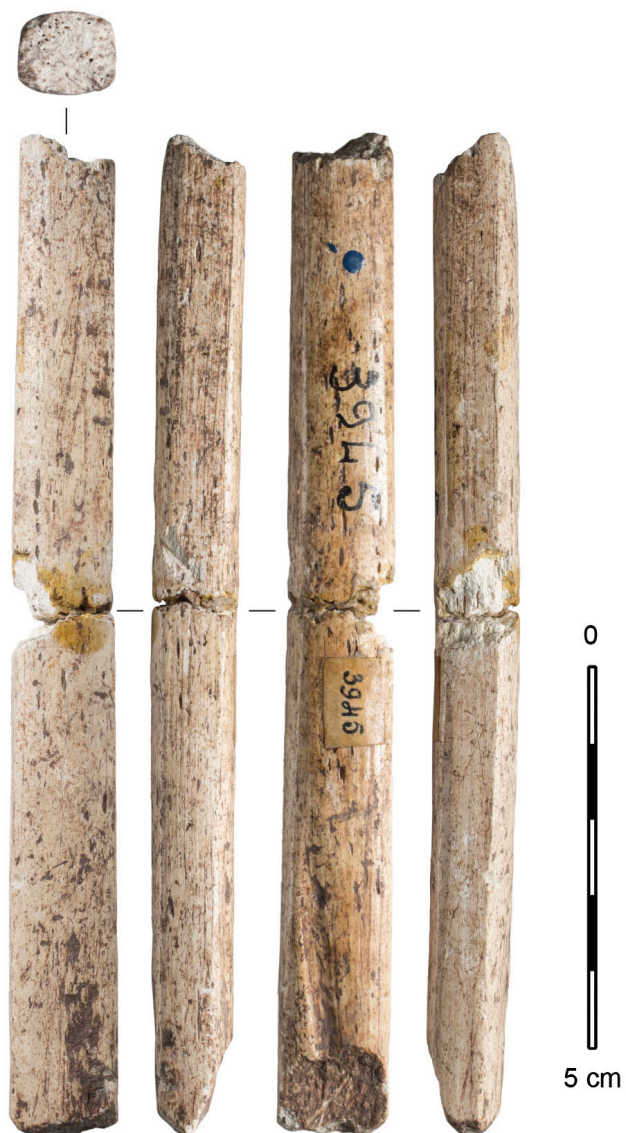

### Supplementary Figure 32

Study number: 820

Museum number: MDW Brassempouy, Dubalen collection

Site and layer: Brassempouy, grotte du Pape

Typology: shaping/maintenance waste?

ZooMS ID: Gray whale

$^{14}\text{C}$  date: MUSE21039,  $13940 \pm 60$  BP, 16884-16299 cal BP

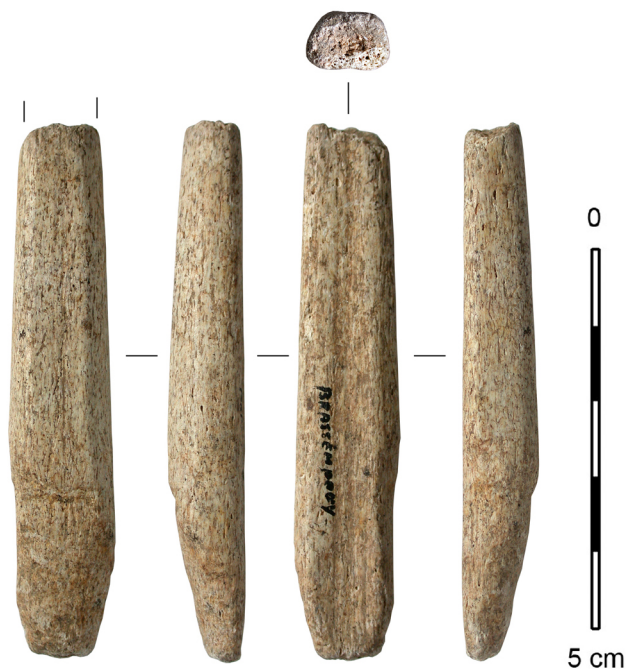

### Supplementary Figure 33

Study number: 821

Museum number: MDW Brassempouy, Dubalen collection

Site and layer: Brassempouy, grotte du Pape

Typology: unidentified

ZooMS ID: Sperm whale

$^{14}\text{C}$  date: MUSE21040,  $13660 \pm 60$  BP, 16514-15946 cal BP

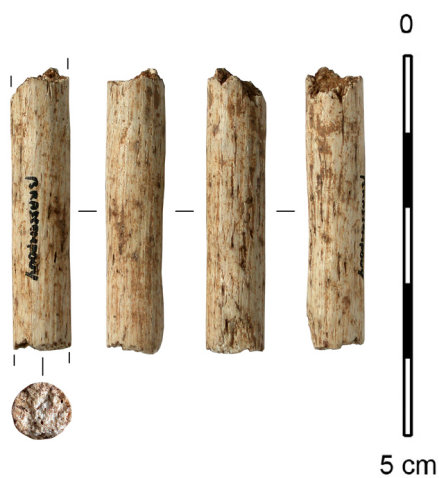

### Supplementary Figure 34

Study number: 822

Museum number: MDW Brassempouy, Dubalen collection

Site and layer: Brassempouy, grotte du Pape

Typology: projectile point

ZooMS ID: Fin whale

$^{14}\text{C}$  date: MUSE21041,  $14150 \pm 70$  BP, 17119-16536 cal BP

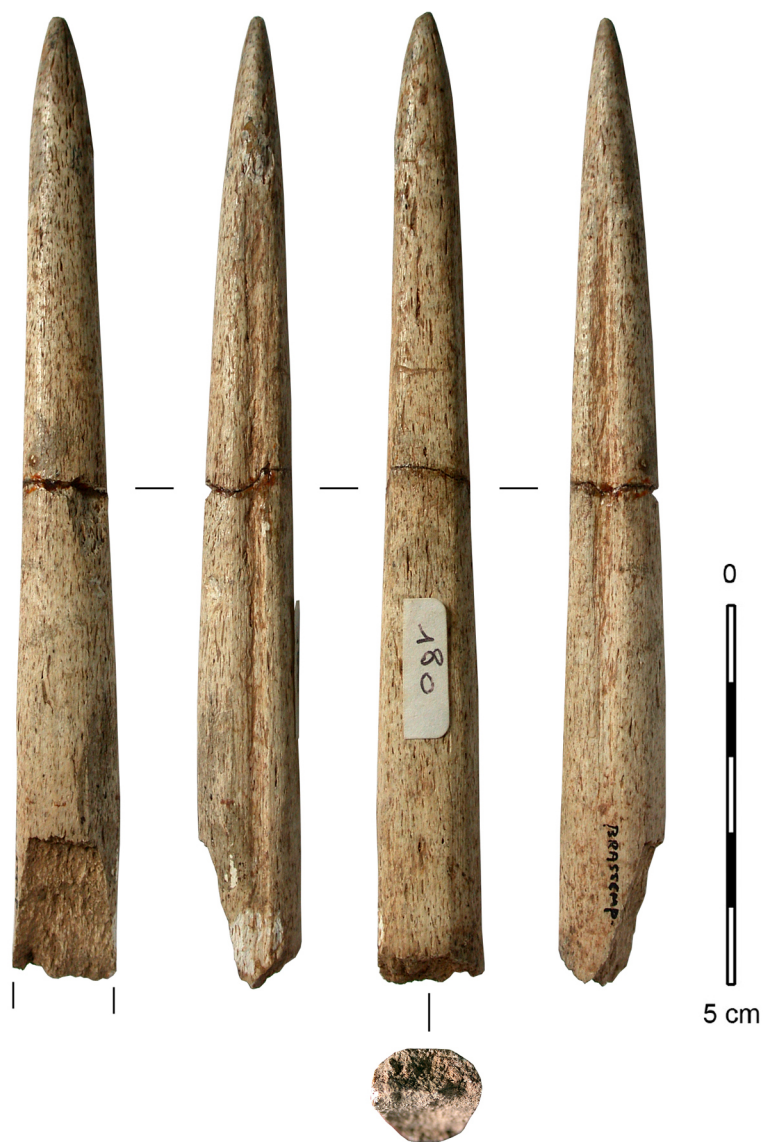

### Supplementary Figure 35

Study number: 827

Museum number: MNP

Site and layer: Madeleine, Magd. V

Typology: projectile point with massive base

ZooMS ID: Gray whale

<sup>14</sup>C date: none

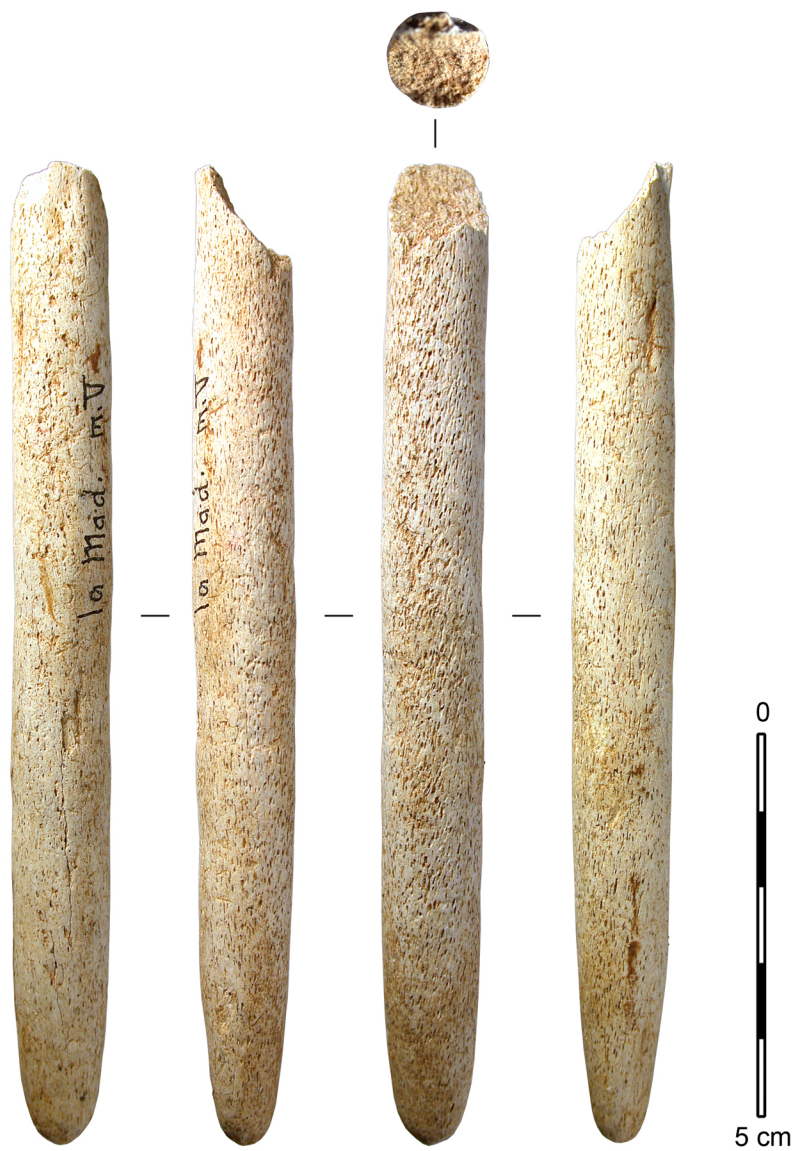



### Supplementary Figure 36

Study number: 828

Museum number: CDP 79.1.267, S CV couche 2 (réattr. 3) 224

Site and layer: Duruthy 4

Typology: projectile point

ZooMS ID: Gray whale

$^{14}\text{C}$  date: MUSE20134,  $14870 \pm 90$  BP, 18062-17379 cal BP

(scale 1:2)

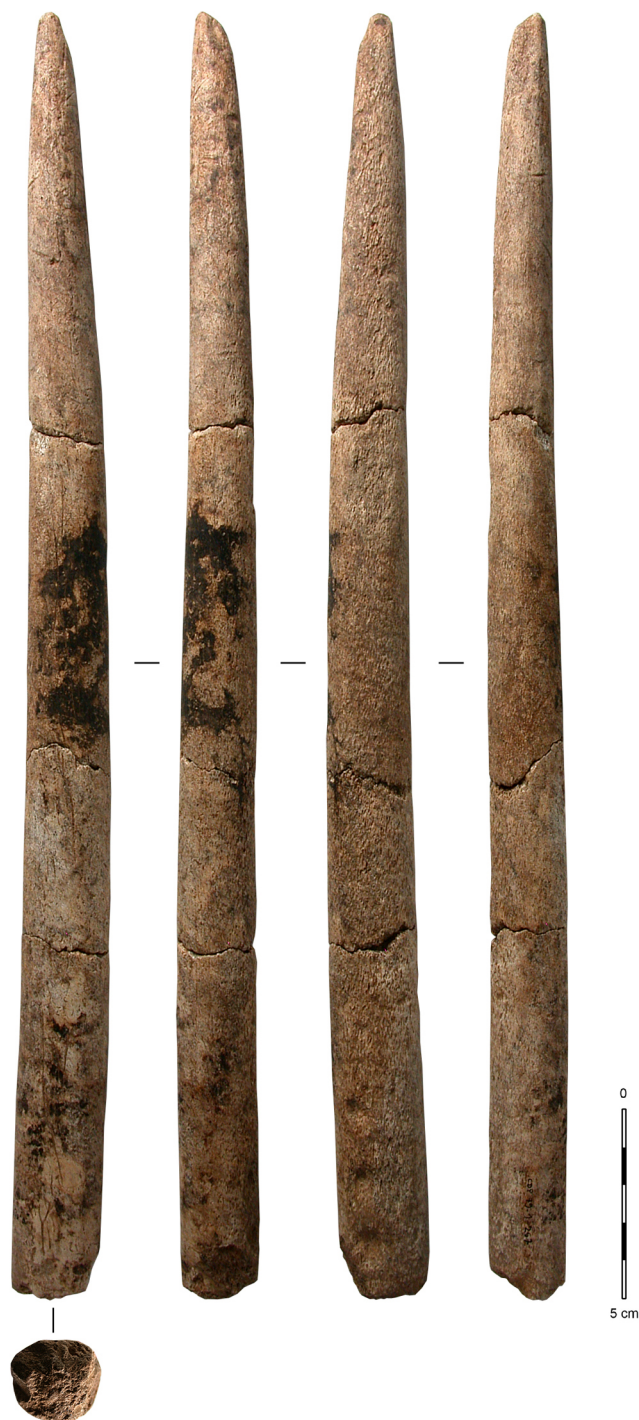

### Supplementary Figure 37

Study number: 829

Museum number: CDP 79.1.77, S BV couche 1

Site and layer: Duruthy 3

Typology: unidentified

ZooMS ID: Fin whale

$^{14}\text{C}$  date: MUSE20135,  $14470 \pm 90$  BP, 17584-16913 cal BP

(photograph taken after sampling)

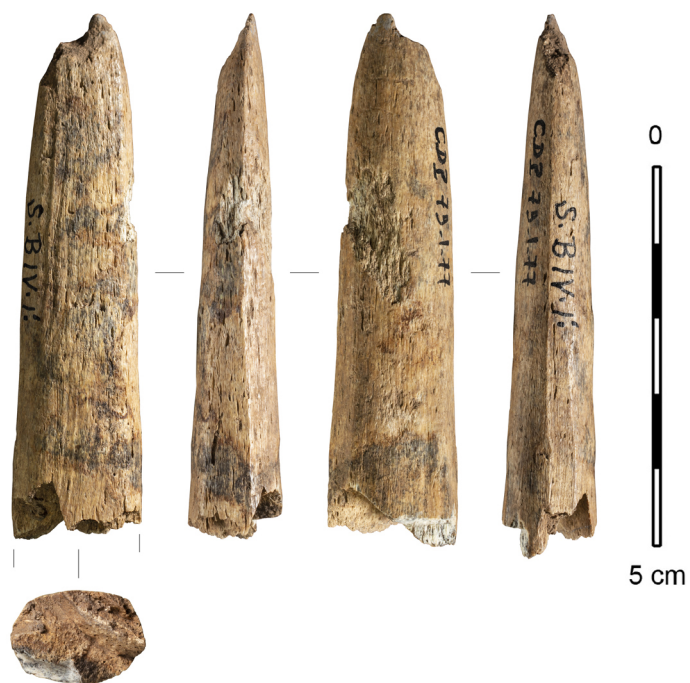

### Supplementary Figure 38

Study number: 830

Museum number: CDP 79.1.18469, S BVI couche 1 n°48

Site and layer: Duruthy 3

Typology: unidentified

ZooMS ID: Right whale / Bowhead whale

$^{14}\text{C}$  date: MUSE20136, failed

(photograph taken after sampling)

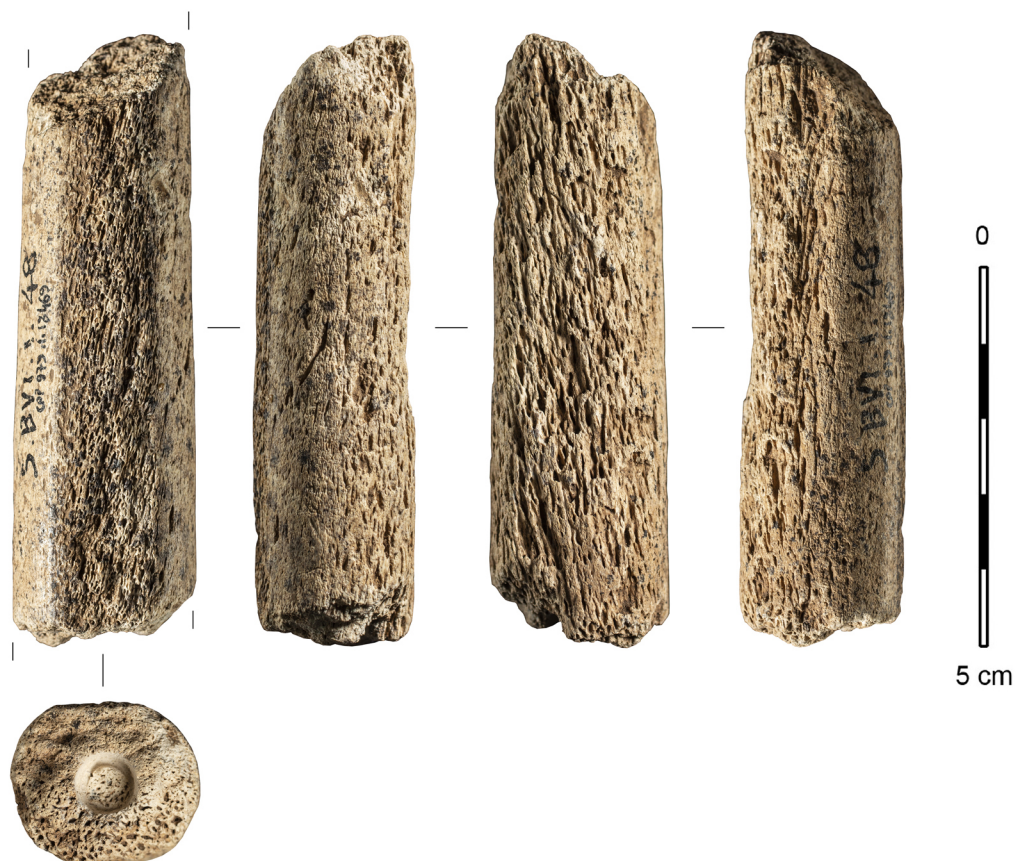

**Supplementary Figure 39**

Study number: 988

Museum number: CDP box 288-1

Site and layer: Duruthy 4

Typology: projectile point

ZooMS ID: Gray whale

$^{14}\text{C}$  date: MUSE21107,  $14330 \pm 70$  BP, 17346-16784 cal BP

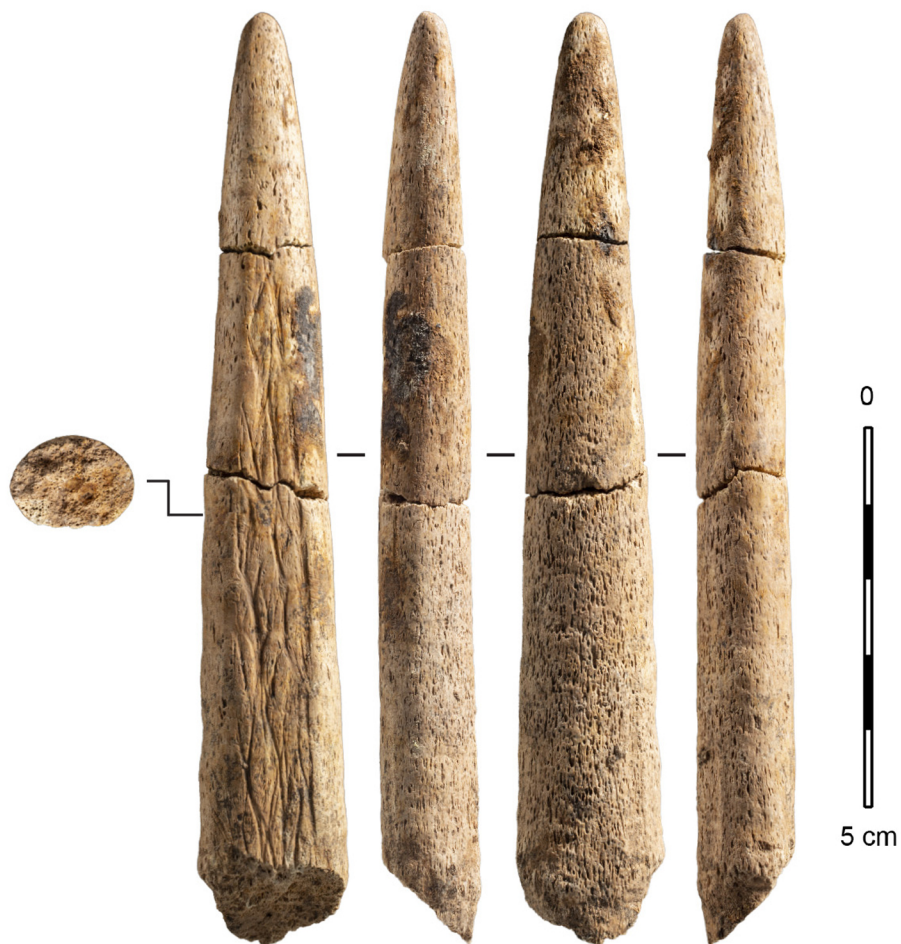



# Supplementary Figure 40

Study number: 968

Museum number: ER III 13 (100-120)

Site and layer: Ermittia III

Typology: projectile point with massive base

ZooMS ID: Gray whale with polymer peaks

<sup>14</sup>C date: MUSE21099, 14420 ± 50 BP, 16915-17416 cal BP

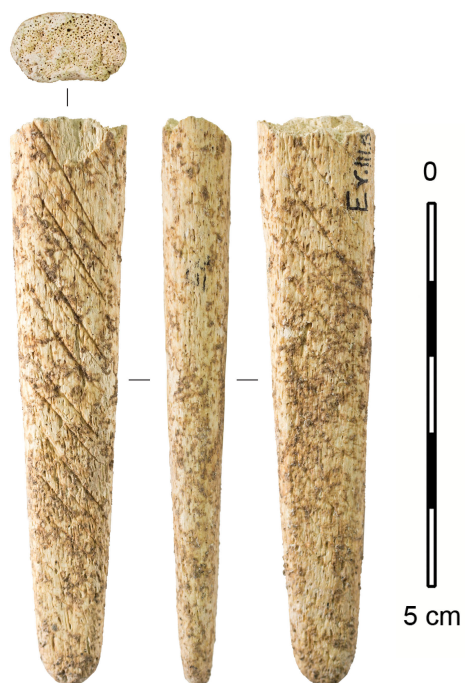

# Supplementary Figure 41

Study number: 969

Museum number: ER III 85

Site and layer: Ermittia III

Typology: projectile point

ZooMS ID: Gray whale

$^{14}\text{C}$  date: MUSE21100,  $14520 \pm 60$  BP, 17004-17604 cal BP

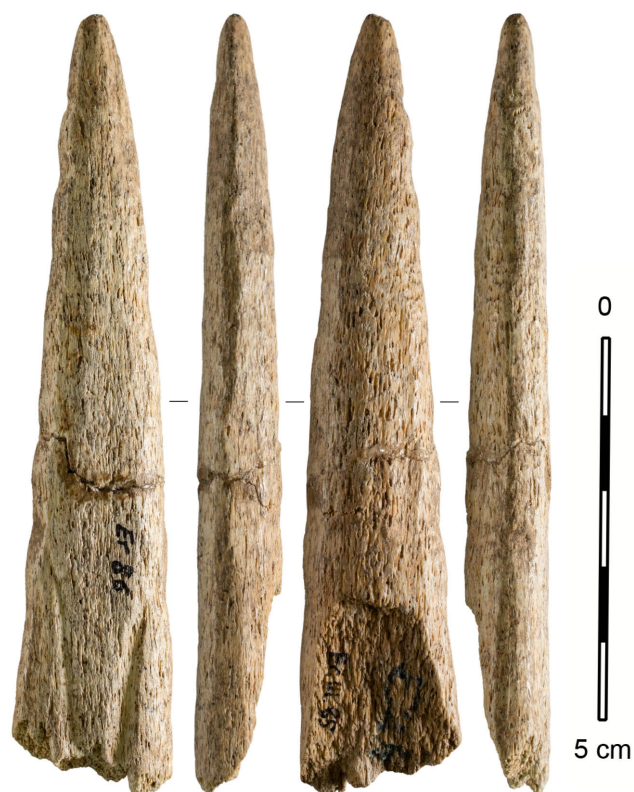

# Supplementary Figure 42

Study number: 970

Museum number: UR 9D 350

Site and layer: Urtiaga D

Typology: unidentified

ZooMS ID: Gray whale

$^{14}\text{C}$  date: MUSE21101,  $14080 \pm 50$  BP, 16492-17017 cal BP

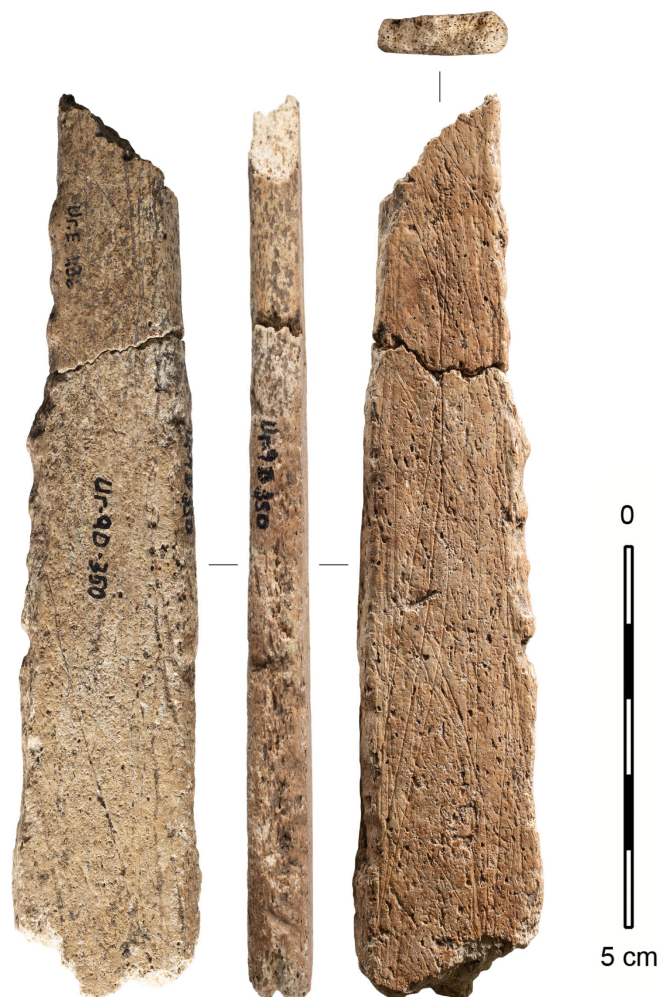

### Supplementary Figure 43

Study number: 971

Museum number: ER III 4 (75-97)

Site and layer: Ermitia III

Typology: projectile point

ZooMS ID: Right whale / Bowhead whale

$^{14}\text{C}$  date: MUSE21102,  $14470 \pm 60$  BP, 16950-17513 cal BP

(scale 1:2)

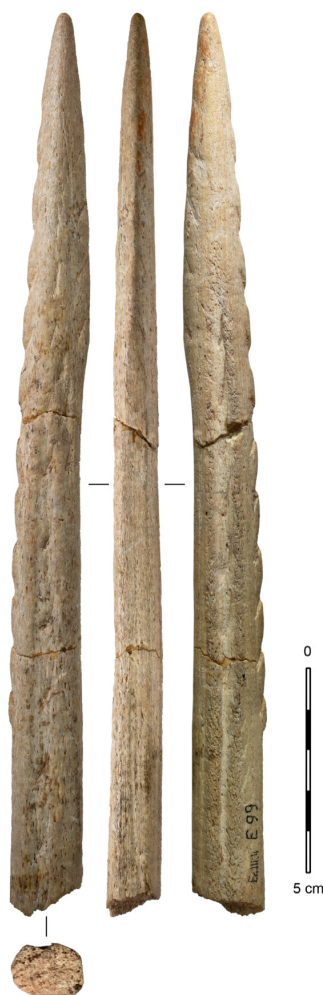

**Supplementary Figure 44**

Study number: 973

Museum number: JU 890014#3

Site and layer: El Juyo 8

Typology: blank?

ZooMS ID: Fin whale

$^{14}\text{C}$  date: MUSE21104,  $16290 \pm 70$  BP, 18992-19563 cal BP

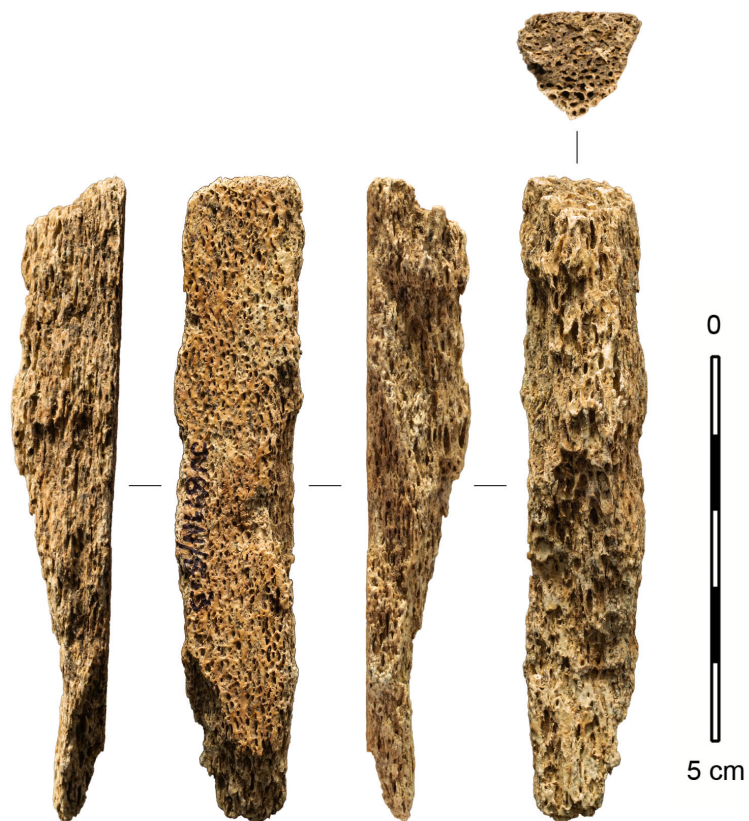



**Supplementary Figure 45**

Study number: 974

Museum number: Ra CE 11473

Site and layer: Rascaño IVb

Typology: object on splinter

ZooMS ID: Fin whale

$^{14}\text{C}$  date: MUSE21105,  $16770 \pm 70$  BP, 19569-20187 cal BP

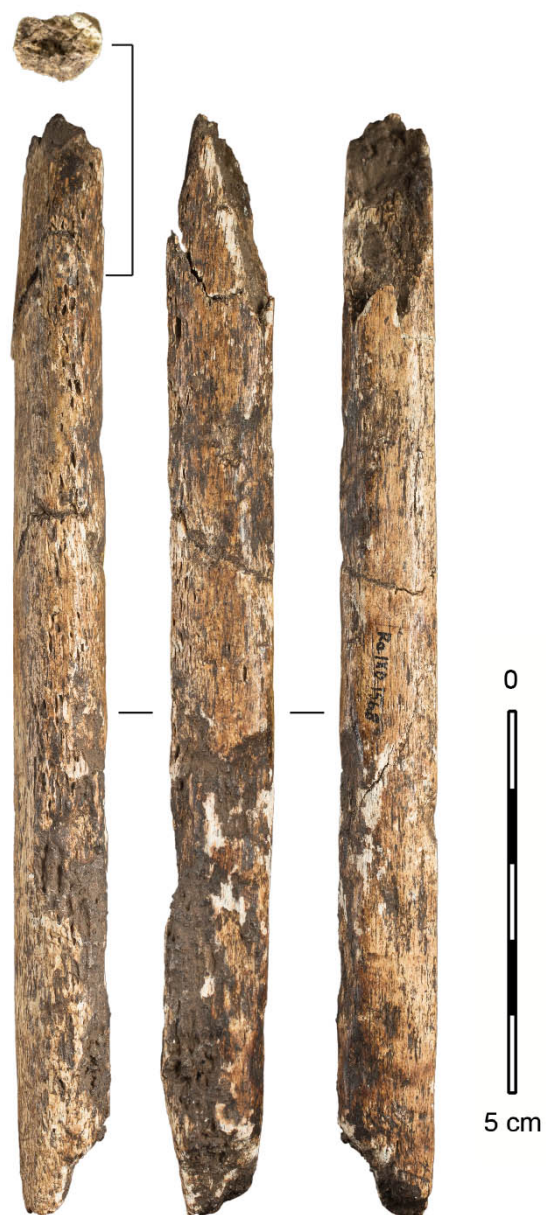

# Supplementary Figure 46

Study number: 975

Museum number: 8638

Site and layer: Las Caldas, Sala II, IIB

Typology: object on splinter

ZooMS ID: Sperm whale

$^{14}\text{C}$  date: MUSE21106,  $13700 \pm 50$  BP, 16010-16549 cal BP

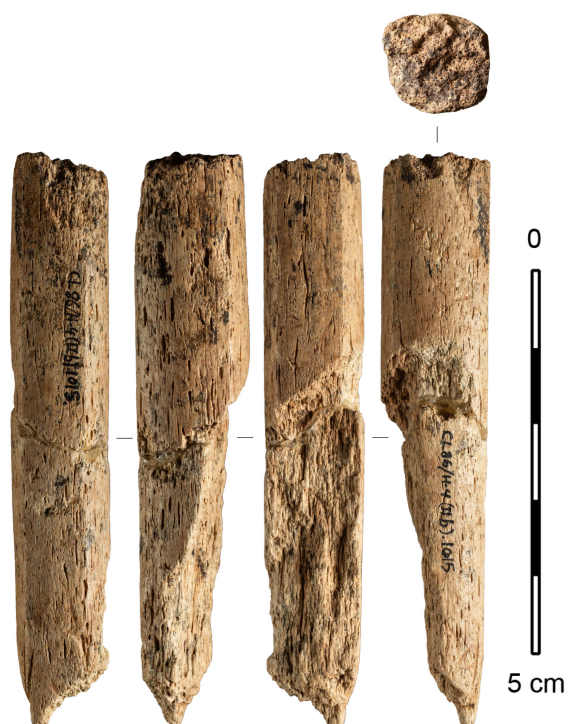

### Supplementary Figure 47

Study number: 976

Museum number: 8640

Site and layer: Las Caldas, Sala II, IIIc-IV

Typology: projectile point with double bevel

ZooMS ID: Sperm whale

<sup>14</sup>C date: none

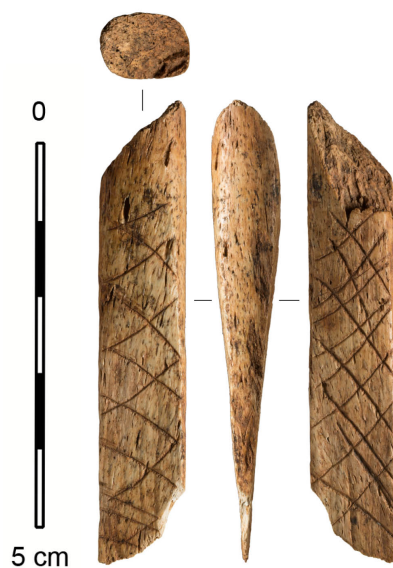

### Supplementary Figure 48

Study number: 977

Museum number: 8644

Site and layer: Las Caldas, Sala II, V

Typology: object on splinter

ZooMS ID: Sperm whale

<sup>14</sup>C date: none

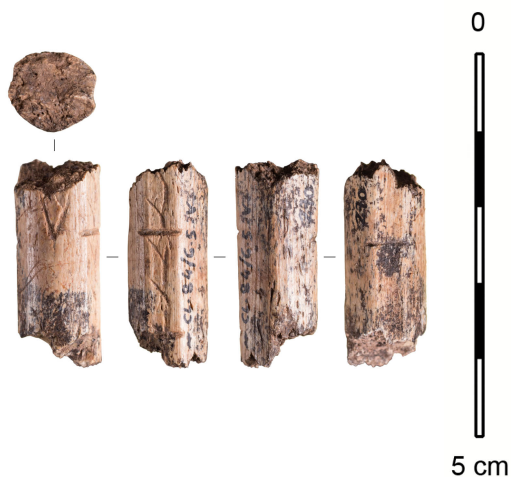

# Supplementary Figure 49

Study number: 978

Museum number: 8645

Site and layer: Las Caldas, Sala II, VIIIb-IX

Typology: projectile point

ZooMS ID: Cetacean (poor spectra)

<sup>14</sup>C date: none

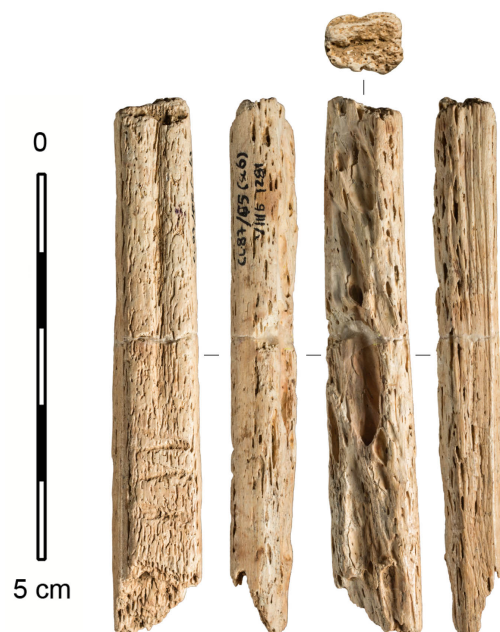

### Supplementary Figure 50

Study number: 979

Museum number: 8646

Site and layer: Las Caldas, Sala II, VIII

Typology: projectile point

ZooMS ID: Dall's/Harbour porpoise (*Phocoenidae*)

<sup>14</sup>C date: none

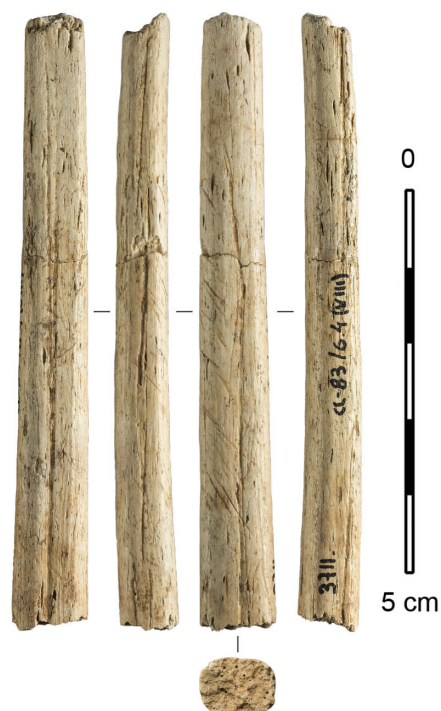

### Supplementary Figure 51

Study number: 980

Museum number: 8647

Site and layer: Las Caldas, Sala II, VIb

Typology: projectile point

ZooMS ID: Blue whale

<sup>14</sup>C date: none

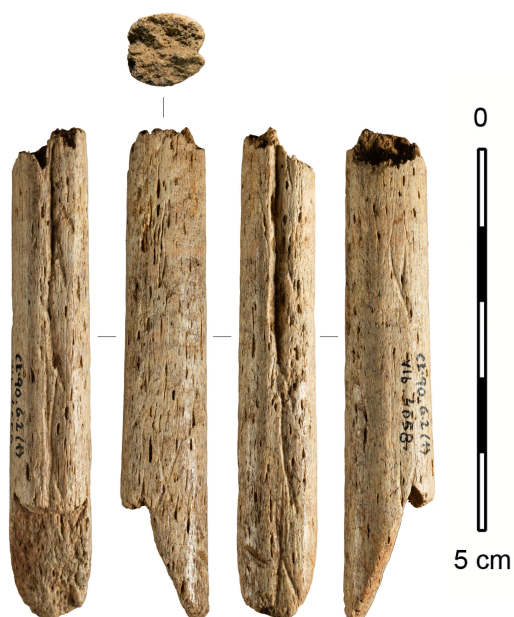



### Supplementary Figure 52

Study number: 981

Museum number: 8648

Site and layer: Las Caldas, Sala II, VIII

Typology: projectile point

ZooMS ID: Sperm whale

<sup>14</sup>C date: none

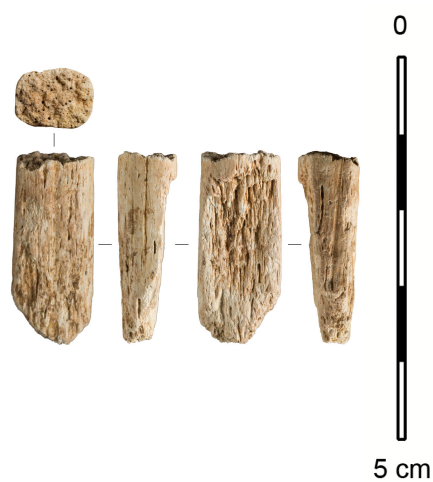

### Supplementary Figure 53

Study number: 982

Museum number: 8650

Site and layer: Las Caldas, Sala II, VI

Typology: foreshaft?

ZooMS ID: Sperm whale

<sup>14</sup>C date: none

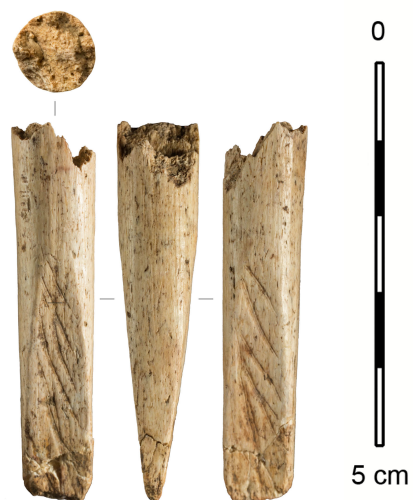

#### Supplementary Figure 54

Study number: 983

Museum number: 8658

Site and layer: Tito Bustillo, Área de Estancia, III

Typology: projectile point

ZooMS ID: Sperm whale

<sup>14</sup>C date: none

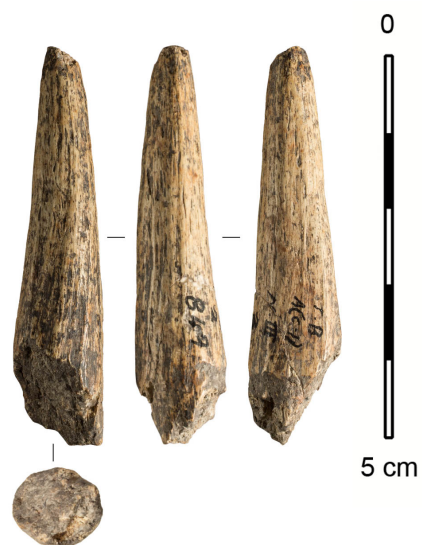

#### Supplementary Figure 55

Study number: 984

Museum number: 8666

Site and layer: Las Caldas, Sala II, VIII

Typology: unidentified

ZooMS ID: Right whale/Bowhead whale

<sup>14</sup>C date: none

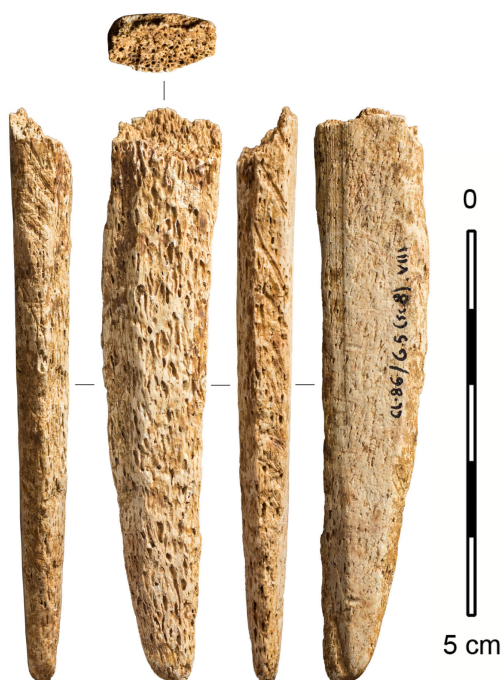

### Supplementary Figure 56

Study number: 985

Museum number: 8699

Site and layer: La Viña IV

Typology: projectile point

ZooMS ID: Gray whale

<sup>14</sup>C date: none

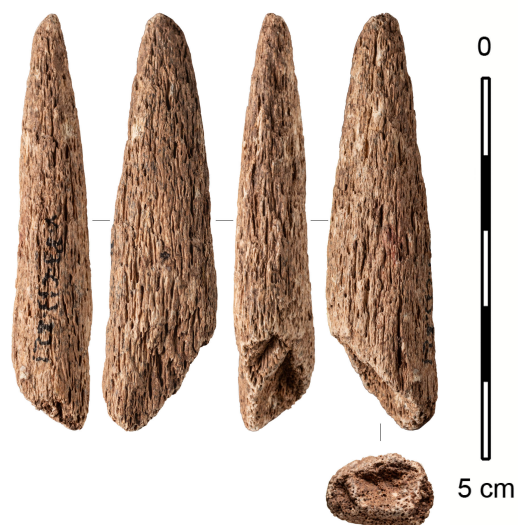

### Supplementary Figure 57

Study number: 986

Museum number: 8701

Site and layer: La Viña IV

Typology: object on splinter

ZooMS ID: Gray whale

<sup>14</sup>C date: none

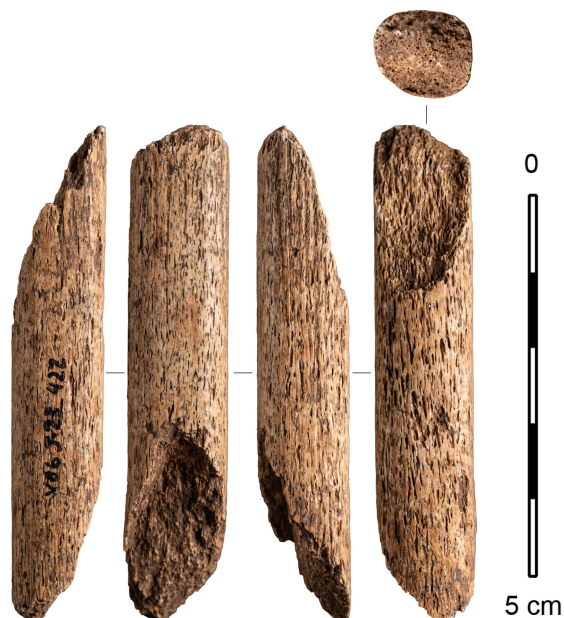

# Supplementary Figure 58

Study number: 987

Museum number: 8703

Site and layer: La Viña IV

Typology: projectile point?

ZooMS ID: Sperm whale

<sup>14</sup>C date: none

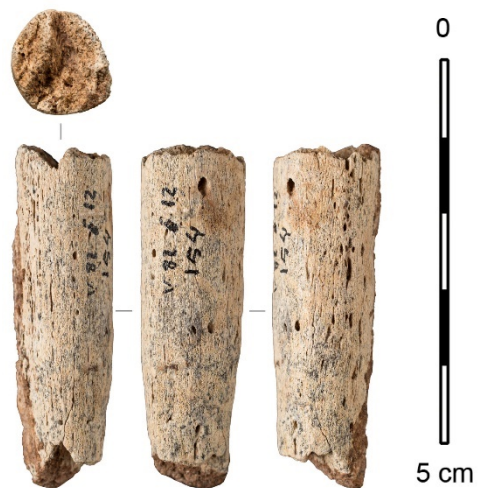

**Supplementary Figure 59**

Study number: Hum1

Museum number: TB-74

Site and layer: Tito Bustillo, Área de Estancia, 1B

Typology: blank?

ZooMS ID: Sperm whale

<sup>14</sup>C date: none

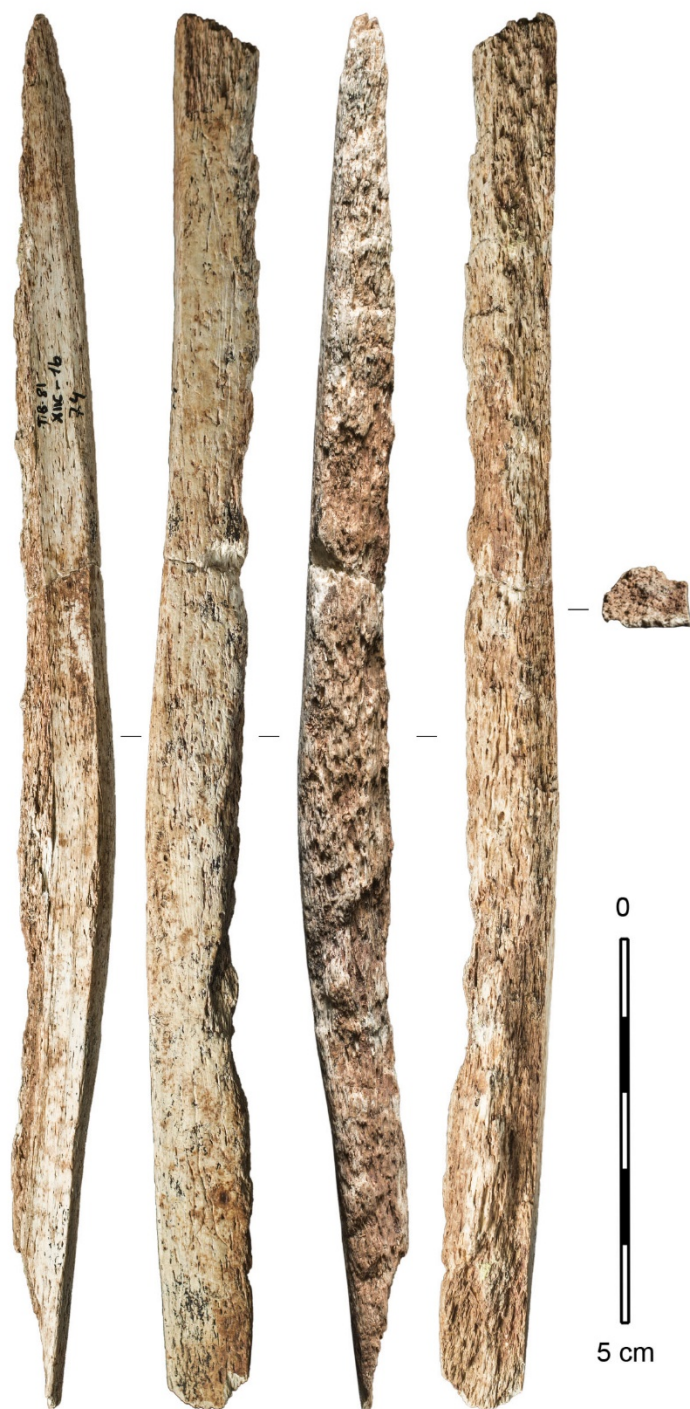



**Supplementary Figure 60**

Study number: Hum4

Museum number: 14-VII-98

Site and layer: Irurain

Typology: object on splinter

ZooMS ID: Sperm whale

<sup>14</sup>C date: UCIAMS289875, 13880 ± 50 BP, 16219-16780 cal BP

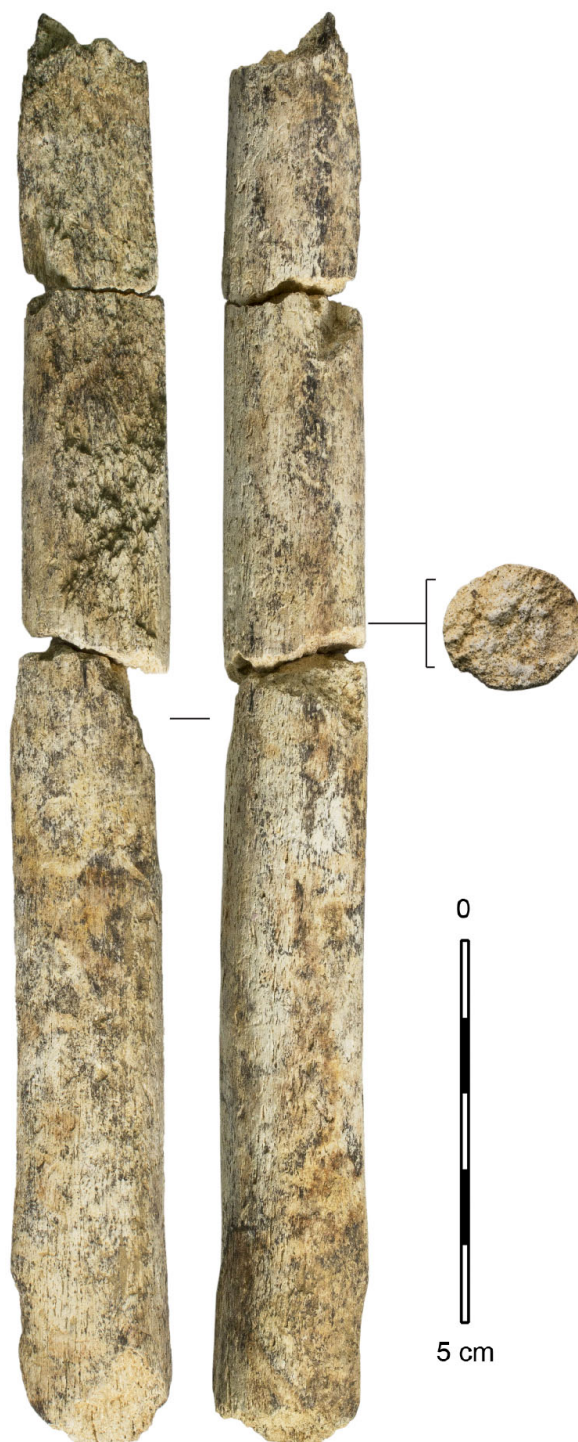

### Supplementary Figure 61

Study number: Hum8

Museum number: 6889

Site and layer: La Paloma 6

Typology: projectile point

ZooMS ID: Sperm whale

$^{14}\text{C}$  date: UCIAMS289876,  $14420 \pm 60$  BP, 16887-17415 cal BP

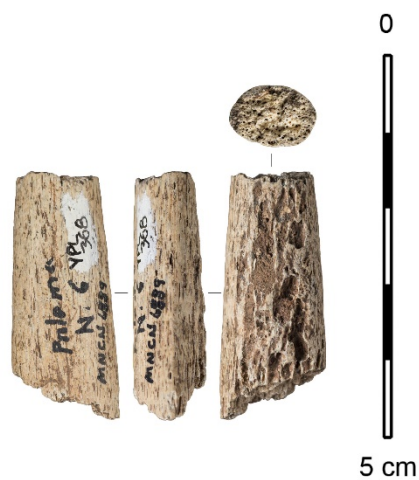

### Supplementary Figure 62

Study number: Hum9

Museum number: 6761

Site and layer: La Paloma 4

Typology: projectile point

ZooMS ID: Fin whale

$^{14}\text{C}$  date: R00217.1,  $14284 \pm 46$  BP, 16730-17265 cal BP

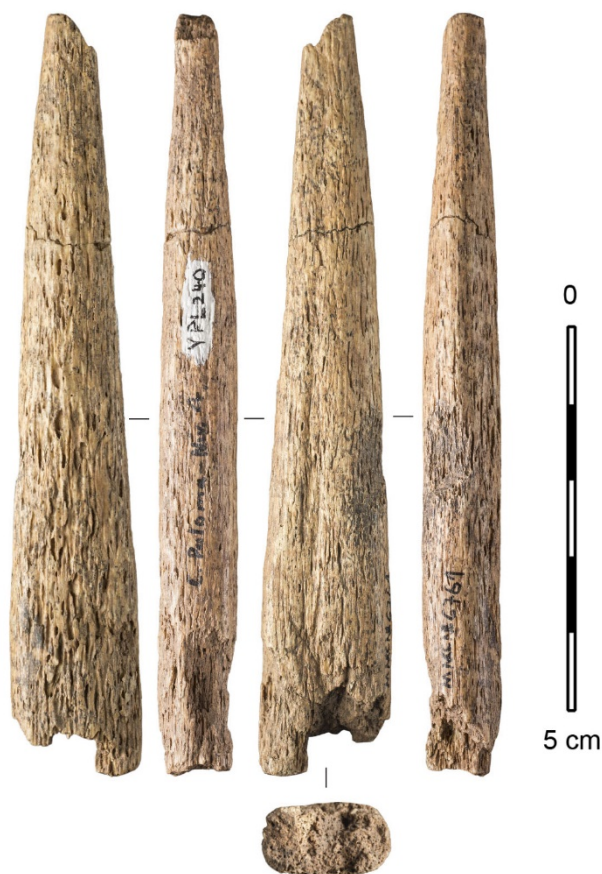

### Supplementary Figure 63

Study number: Hum14

Museum number: MNP-2012-3-1-12

Site and layer: Bourrouilla, déblais fouilles clandestines

Typology: unidentified

ZooMS ID: Fin whale

$^{14}\text{C}$  date: R00222.1,  $14046 \pm 110$  BP, 16340-17056 cal BP

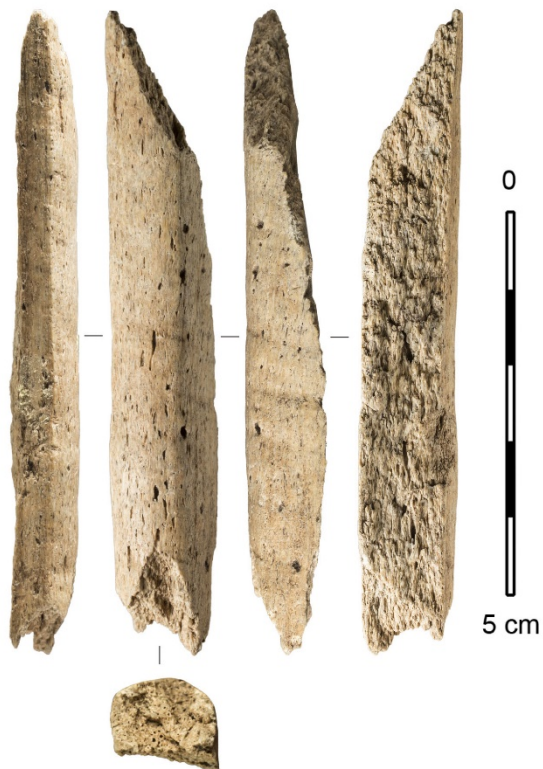

### Supplementary Figure 64

Study number: Hum18

Museum number: PBII-75/16/2/76

Site and layer: El Pendo II

Typology: projectile point

ZooMS ID: Sperm whale

$^{14}\text{C}$  date: R00225.1,  $15549 \pm 56$  BP, 18222-18703 cal BP

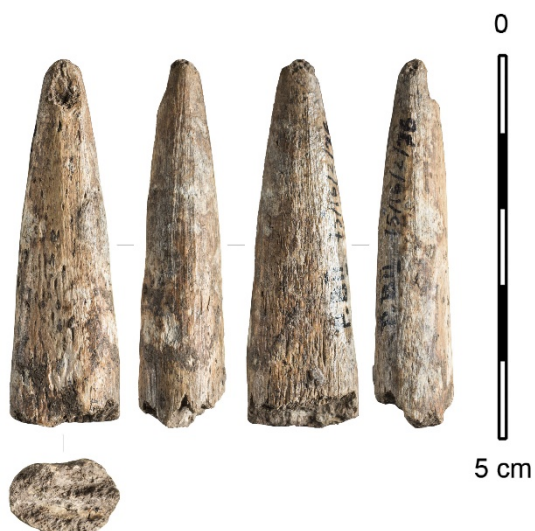



### Supplementary Figure 65

Study number: SC A6 127 68

Museum number: SC A6 127 68

Site and layer: Santa Catalina III

Typology: unworked

ZooMS ID: Right whale / Bowhead whale

<sup>14</sup>C dates:

MUSE21034, 13800 ± 60 BP, 16701-16119 cal BP

MUSE20050, 13770 ± 60 BP, 16657-16081 cal BP

MUSE20051, 13670 ± 60 BP, 16527-15959 cal BP

(scale 1:4)

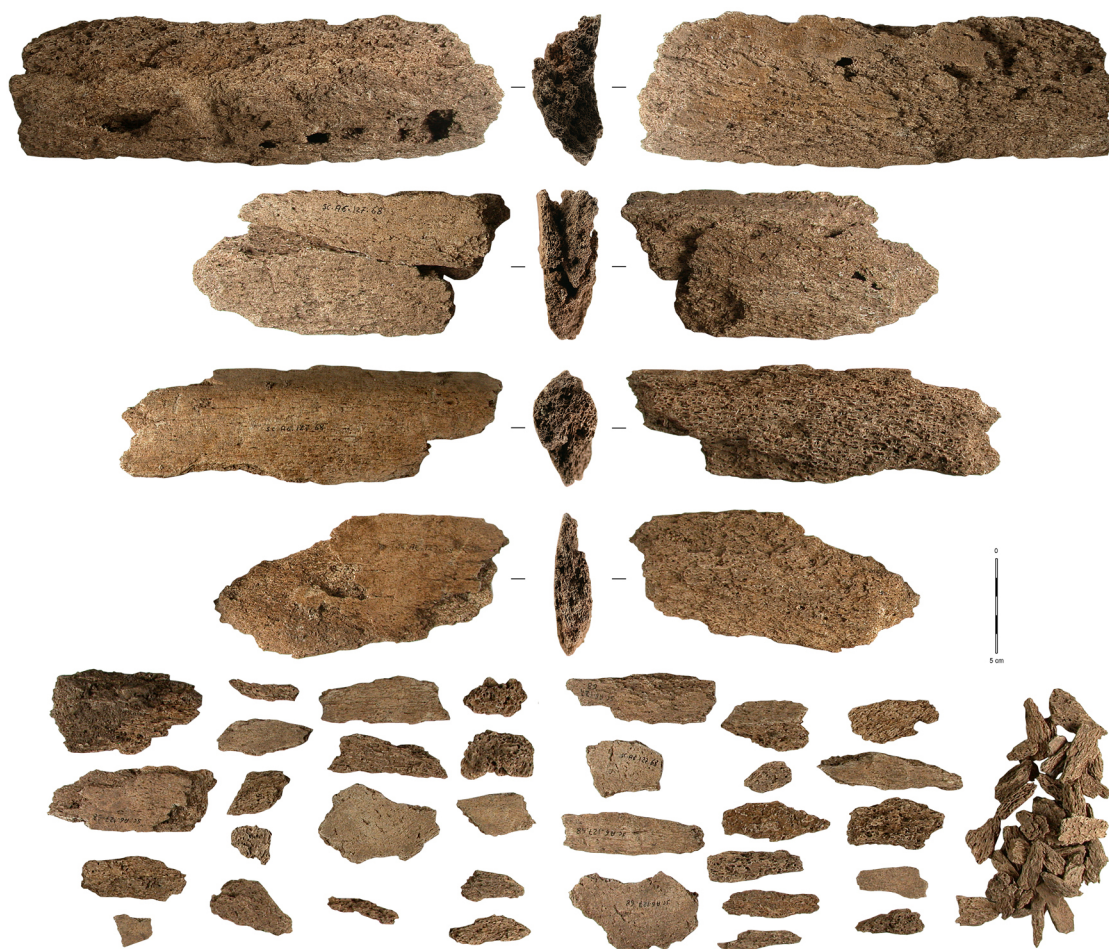

**Supplementary Figure 66**

Study number: SC A6 130 15

Museum number: SC A6 130 15

Site and layer: Santa Catalina III

Typology: unworked

ZooMS ID: Fin whale

$^{14}\text{C}$  date: MUSE20065,  $12790 \pm 70$  BP, 15385-14803 cal BP

(photograph taken after sampling)

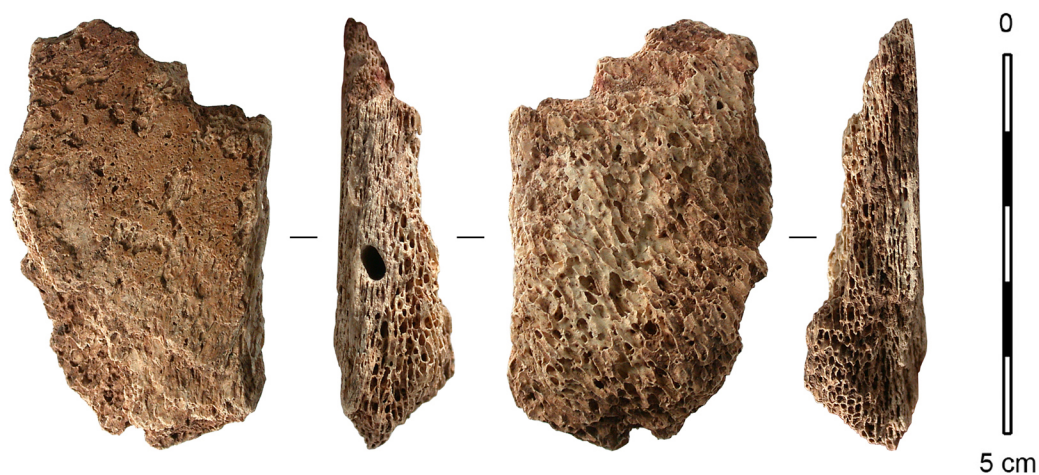**Supplementary Figure 67**

Study number: SC A6 L31G 2971

Museum number: SC A6 L31G 2971

Site and layer: Santa Catalina III

Typology: unworked

ZooMS ID: Right whale / Bowhead whale

$^{14}\text{C}$  date: MUSE20049,  $13720 \pm 90$  BP, 16643-15972 cal BP

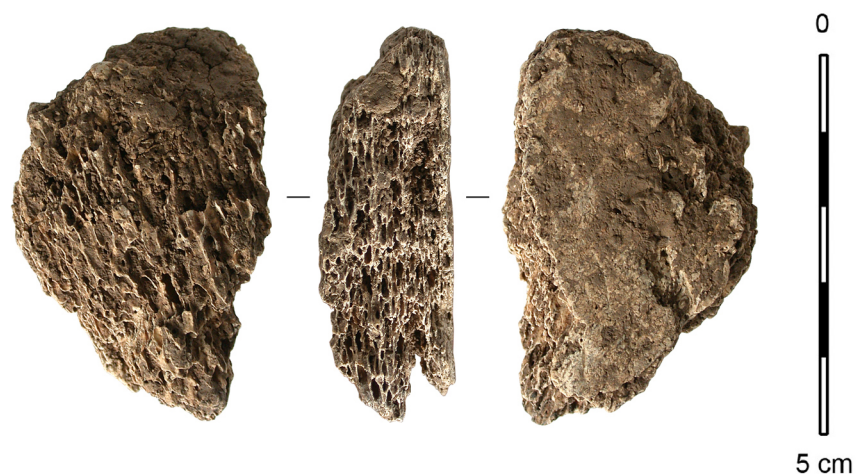



**Supplementary Figure 68**

Study number: SC A8 118 63

Museum number: SC A8 118 63

Site and layer: Santa Catalina III

Typology: unworked

ZooMS ID: Fin whale

$^{14}\text{C}$  date: MUSE20037,  $13040 \pm 50$  BP, 15672-15153 cal BP

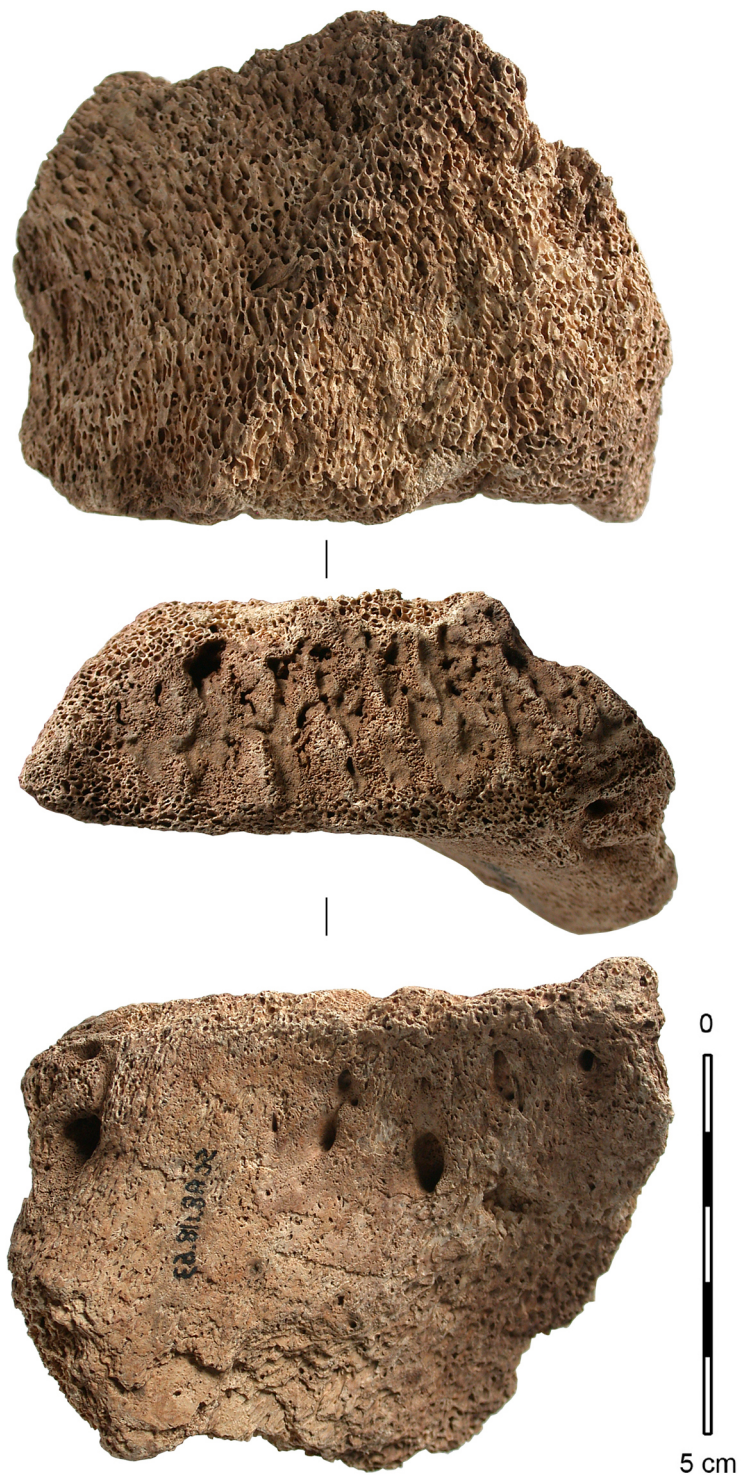

**Supplementary Figure 69**

Study number: SC A8 83 486

Museum number: SC A8 83 486

Site and layer: Santa Catalina II

Typology: unworked

ZooMS ID: Fin whale

$^{14}\text{C}$  date: MUSE20034,  $12700 \pm 70$  BP, 15259-14609 cal BP

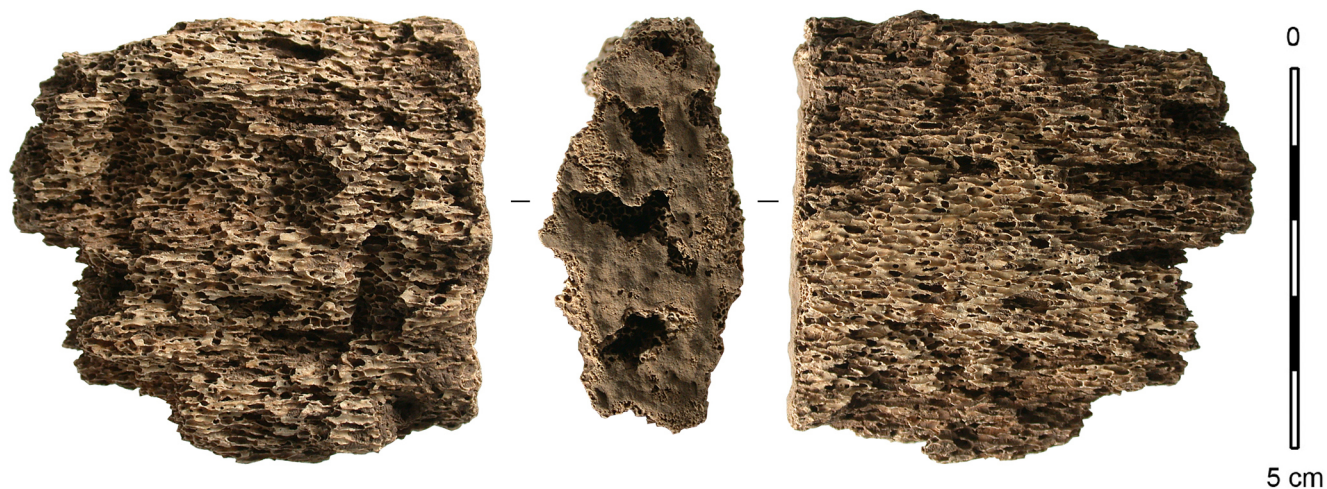**Supplementary Figure 70**

Study number: SC B4 87 76

Museum number: SC B4 87 76

Site and layer: Santa Catalina II

Typology: unworked

ZooMS ID: Fin whale

$^{14}\text{C}$  date: MUSE20035,  $12990 \pm 50$  BP, 15611-15096 cal BP

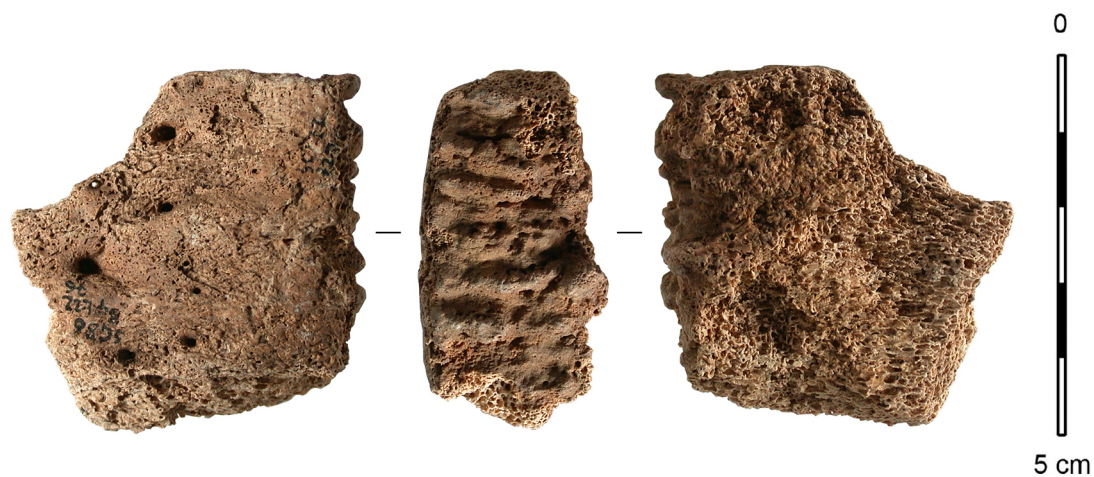



**Supplementary Figure 71**

Study number: SC B4 87 77

Museum number: SC B4 87 77

Site and layer: Santa Catalina II

Typology: unworked

ZooMS ID: Fin whale

$^{14}\text{C}$  date: MUSE20066,  $12670 \pm 60$  BP, 15204-14850 cal BP  
(photograph taken after sampling)

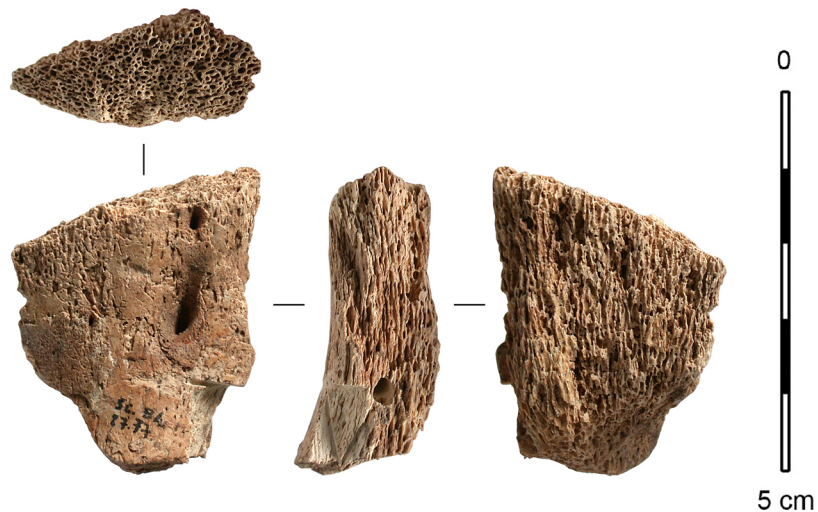**Supplementary Figure 72**

Study number: SC B6 109 1085

Museum number: SC B6 109 1085

Site and layer: Santa Catalina III

Typology: unworked

ZooMS ID: Fin whale

$^{14}\text{C}$  date: MUSE20038,  $13010 \pm 50$  BP, 15634-15119 cal BP

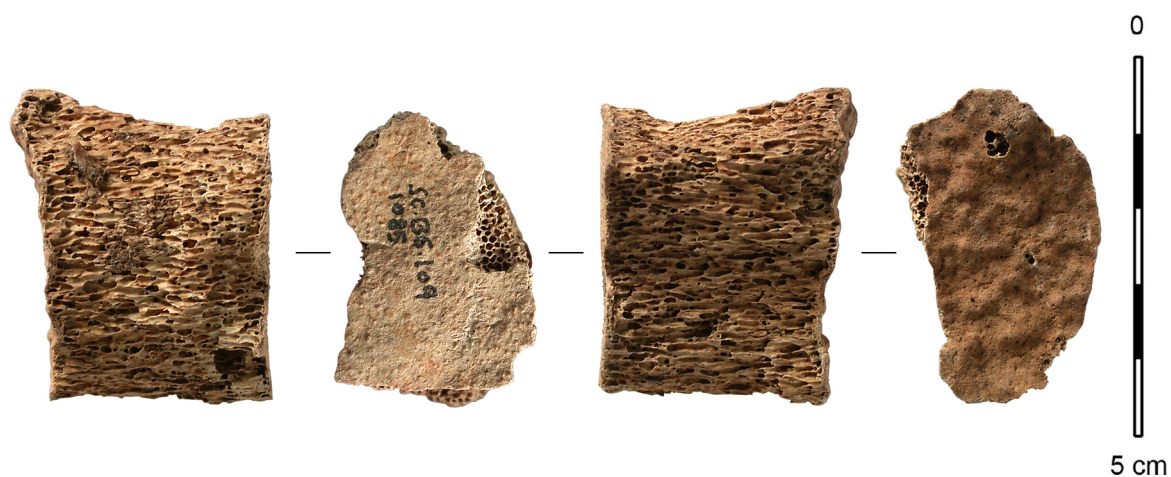

**Supplementary Figure 73**

Study number: SC B6 135 24

Museum number: SC B6 135 24

Site and layer: Santa Catalina III

Typology: unworked

ZooMS ID: Fin whale

$^{14}\text{C}$  date: MUSE20039,  $13060 \pm 50$  BP, 15699-15177 cal BP

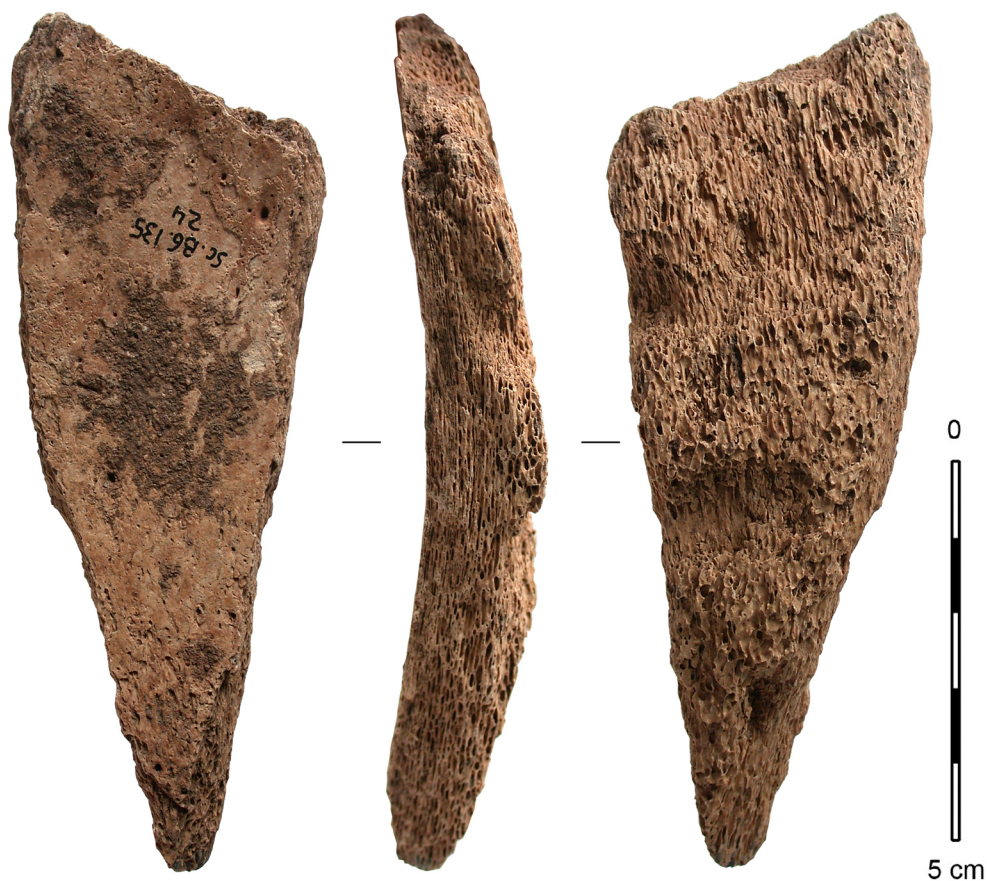**Supplementary Figure 74**

Study number: SC B6 151 48

Museum number: SC B6 151 48

Site and layer: Santa Catalina III

Typology: unworked

ZooMS ID: Fin whale

$^{14}\text{C}$  date: MUSE20067,  $12990 \pm 60$  BP, 15624-15082 cal BP

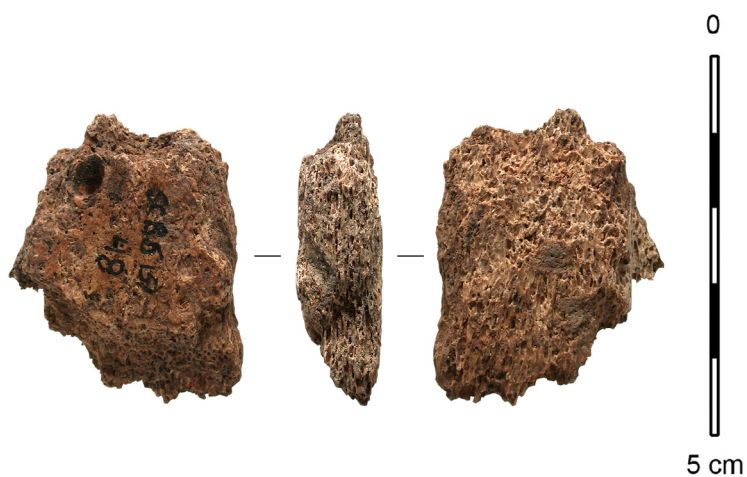

**Supplementary Figure 75**

Study number: SC B6 152 44

Museum number: SC B6 152 44

Site and layer: Santa Catalina III

Typology: unworked

ZooMS ID: Fin whale

$^{14}\text{C}$  date: MUSE20068,  $13170 \pm 60$  BP, 15868-15293 cal BP

(photograph taken after sampling)

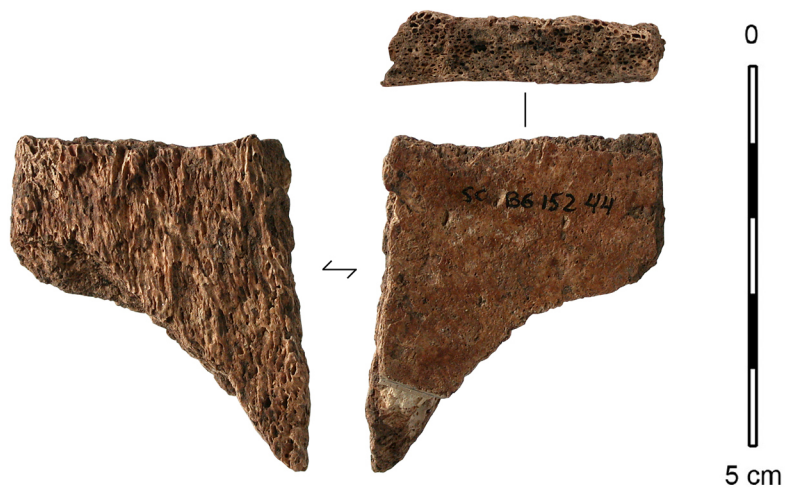**Supplementary Figure 76**

Study number: SC B6 83 67

Museum number: SC B6 83 67

Site and layer: Santa Catalina II

Typology: unworked

ZooMS ID: Fin whale

$^{14}\text{C}$  date: MUSE20036,  $12970 \pm 50$  BP, 15588-15072 cal BP

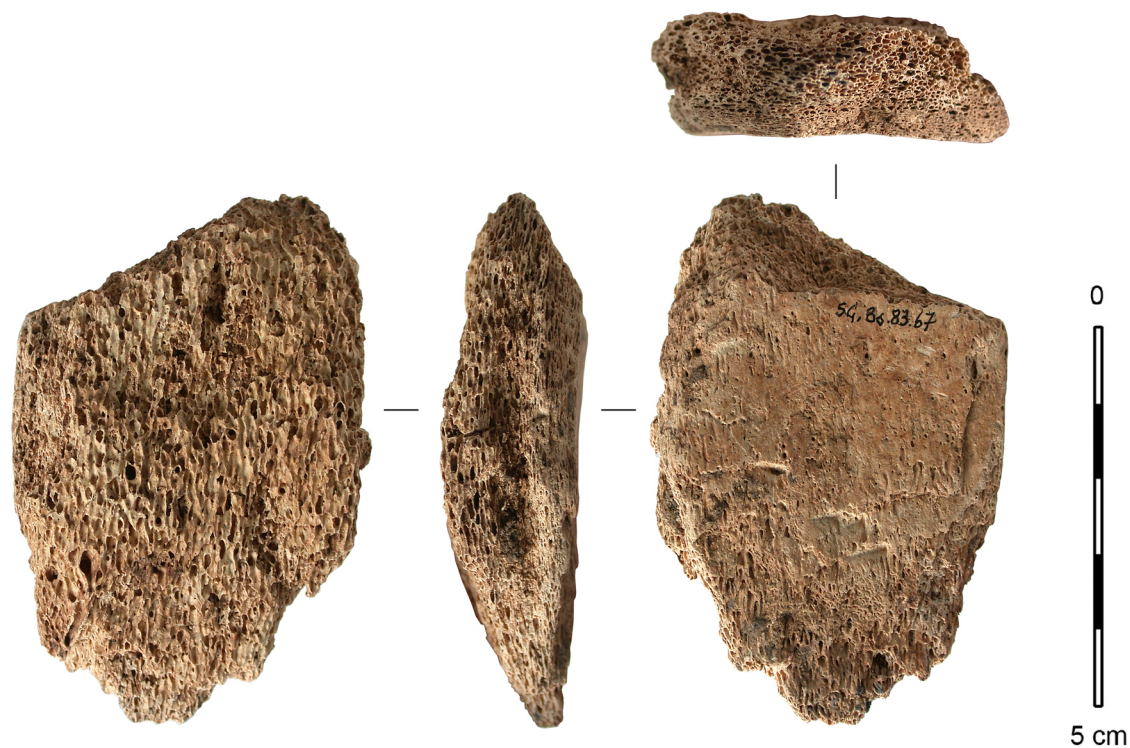



**Supplementary Figure 77**

Study number: SC B8 124 1180

Museum number: SC B8 124 1180

Site and layer: Santa Catalina III

Typology: unworked

ZooMS ID: Fin whale

$^{14}\text{C}$  date: MUSE20041,  $13090 \pm 50$  BP, 15740-15212 cal BP

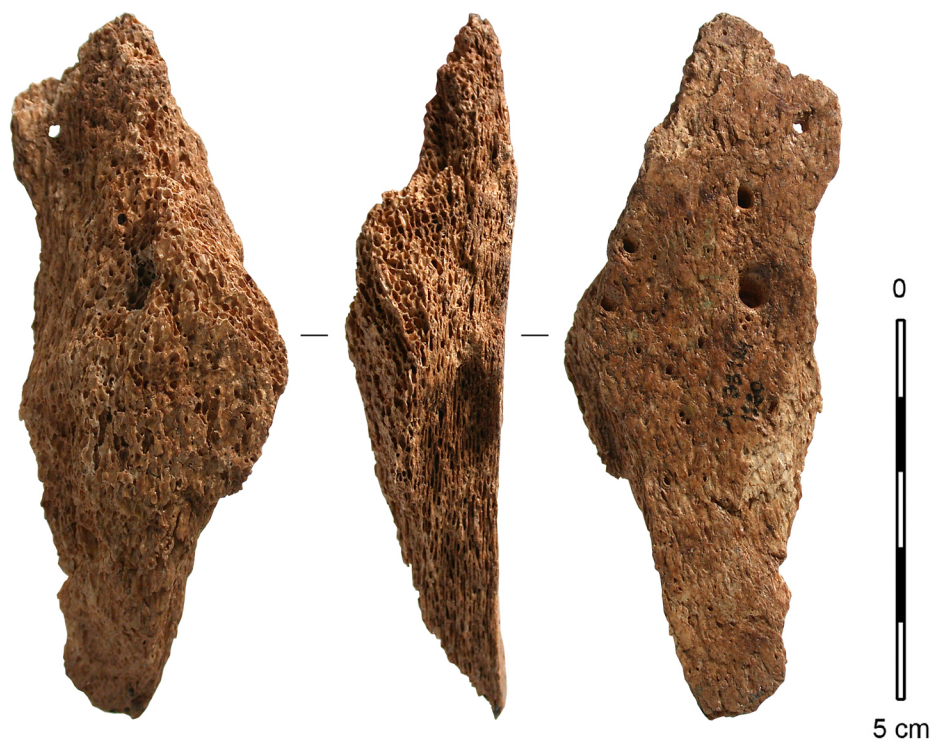

**Supplementary Figure 78**

Study number: SC B8 143 1392

Museum number: SC B8 143 1392

Site and layer: Santa Catalina III

Typology: unworked

ZooMS ID: Fin whale / Right whale / Bowhead whale

<sup>14</sup>C date: MUSE20043, 13040 ± 50 BP, 15672-15153 cal BP

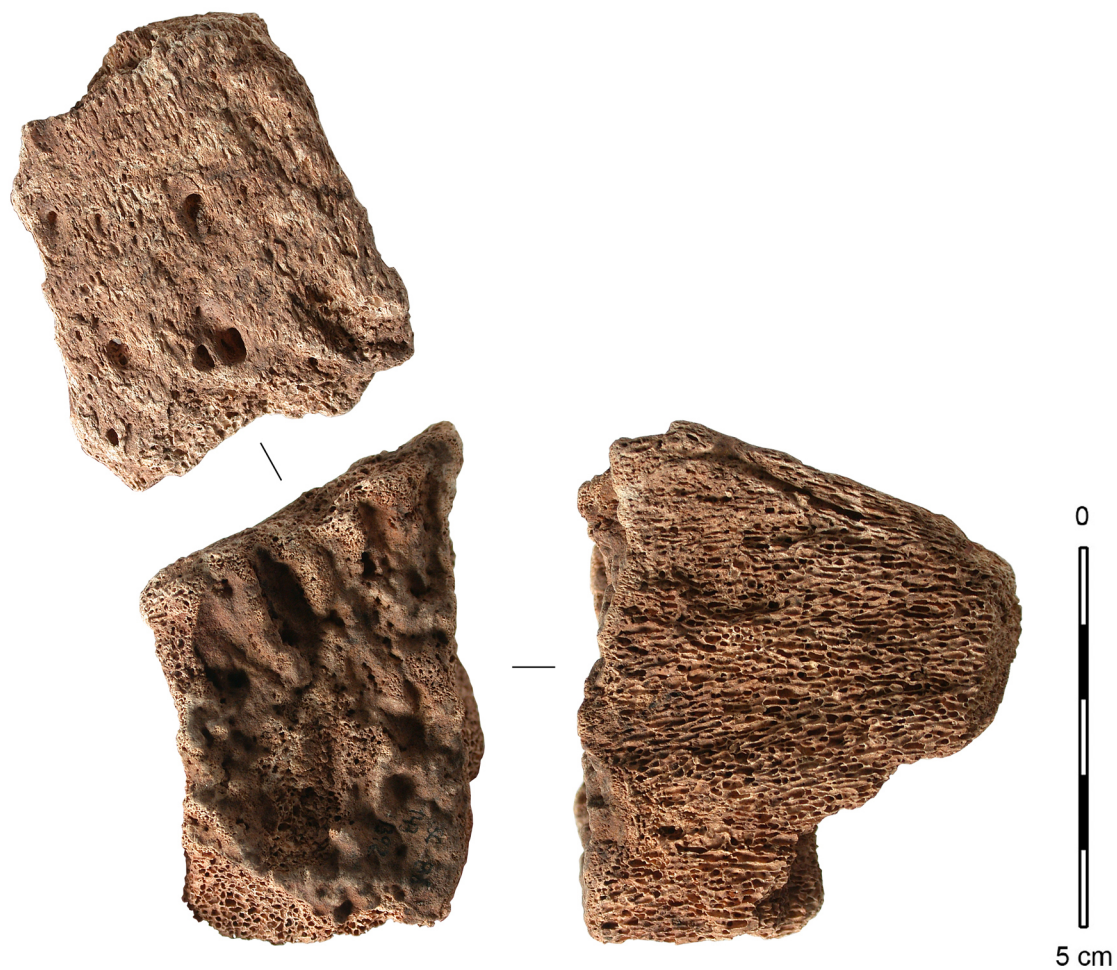

**Supplementary Figure 79**

Study number: SC B8 144 439

Museum number: SC B8 144 439

Site and layer: Santa Catalina III

Typology: unworked

ZooMS ID: Fin whale

<sup>14</sup>C date: MUSE20045, 13090 ± 50 BP, 15740-15212 cal BP

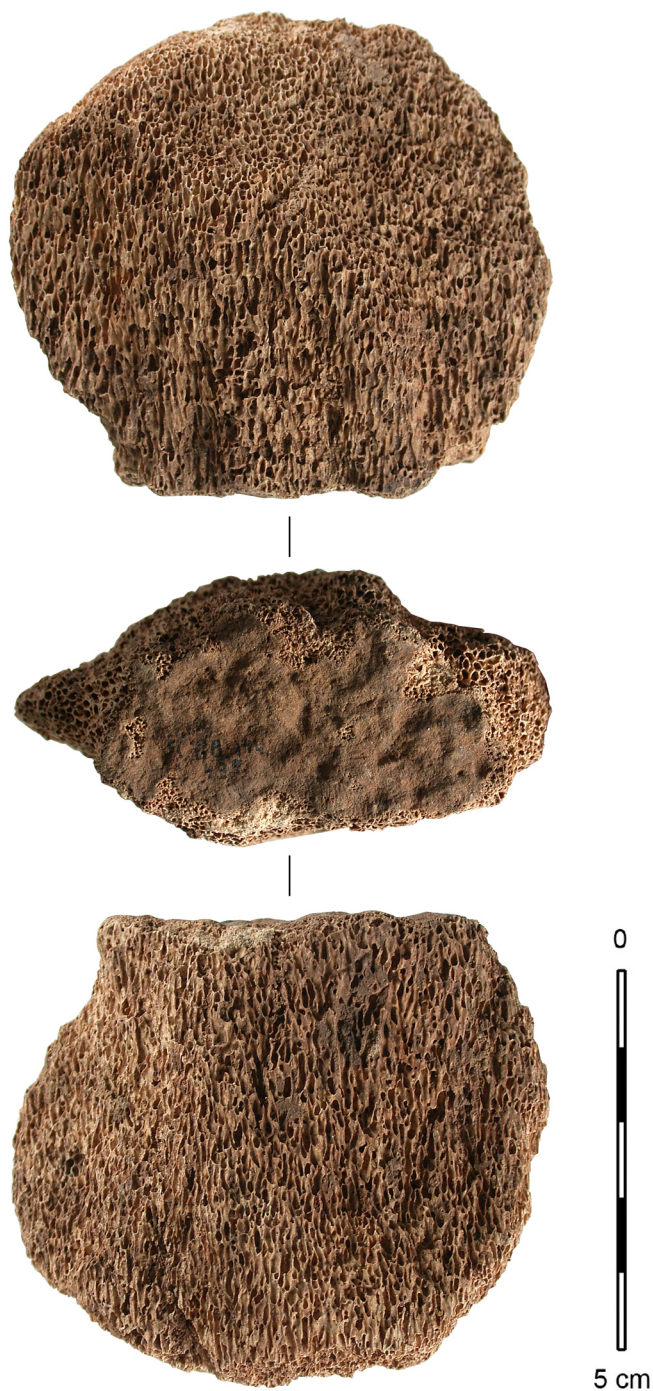



### Supplementary Figure 80

Study number: SC B8 151 477

Museum number: SC B8 151 477

Site and layer: Santa Catalina III

Typology: unworked

ZooMS ID: Fin whale

$^{14}\text{C}$  date: MUSE20047,  $13080 \pm 50$  BP, 15727-15201 cal BP

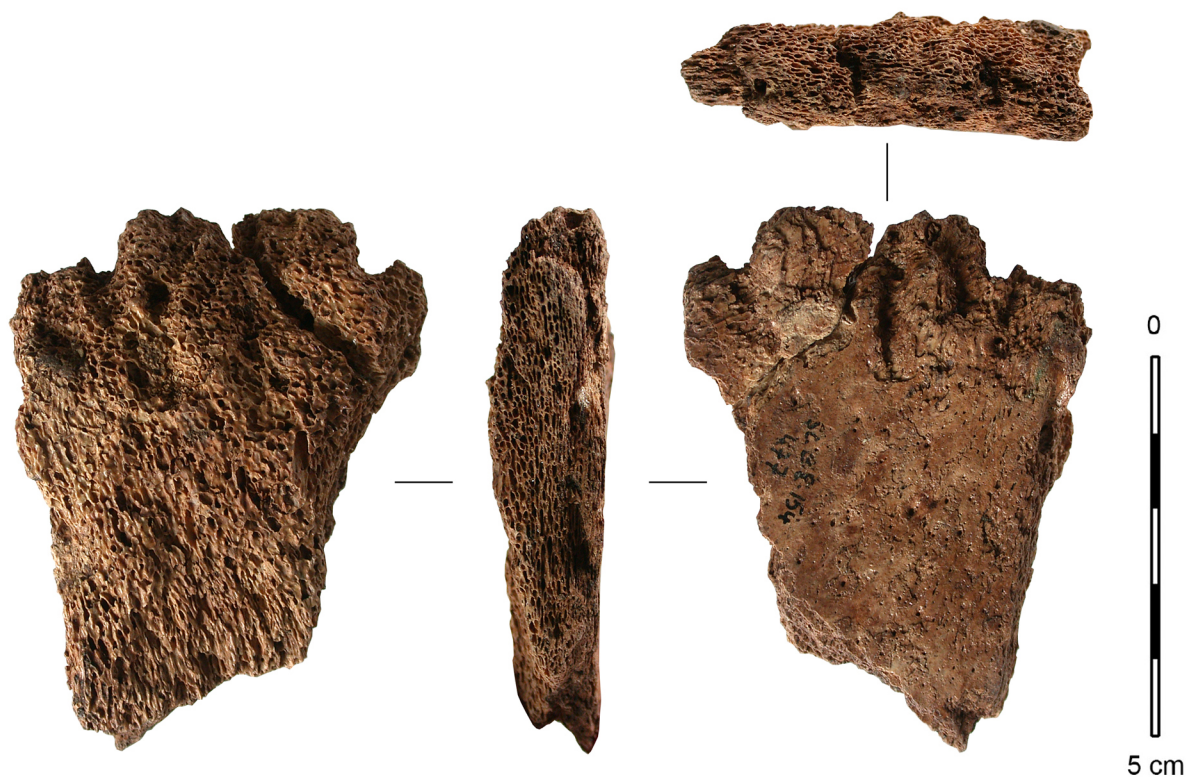

### Supplementary Figure 81

Study number: SC B8 153 130

Museum number: SC B8 153 130

Site and layer: Santa Catalina III

Typology: unworked

ZooMS ID: Fin whale

$^{14}\text{C}$  date: MUSE20069,  $13010 \pm 60$  BP, 15648-15106 cal BP  
(photograph taken after sampling)

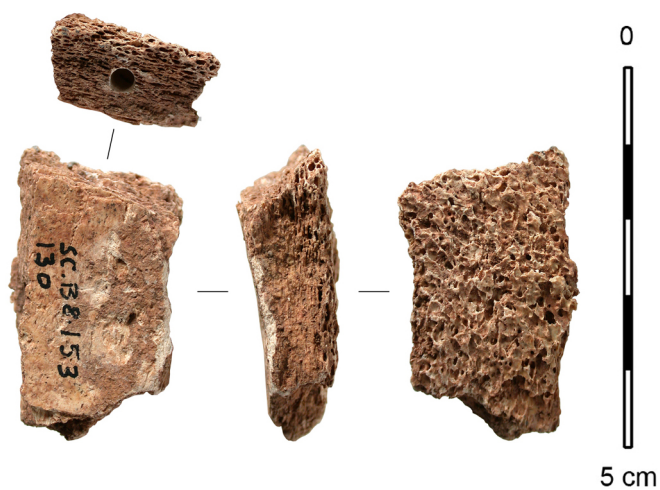

**Supplementary Figure 82**

Study number: SC B8 153 147

Museum number: SC B8 153 147

Site and layer: Santa Catalina III

Typology: unworked

ZooMS ID: Fin whale

$^{14}\text{C}$  date: MUSE20033,  $13070 \pm 60$  BP, 15726-15175 cal BP  
(photograph taken after sampling)

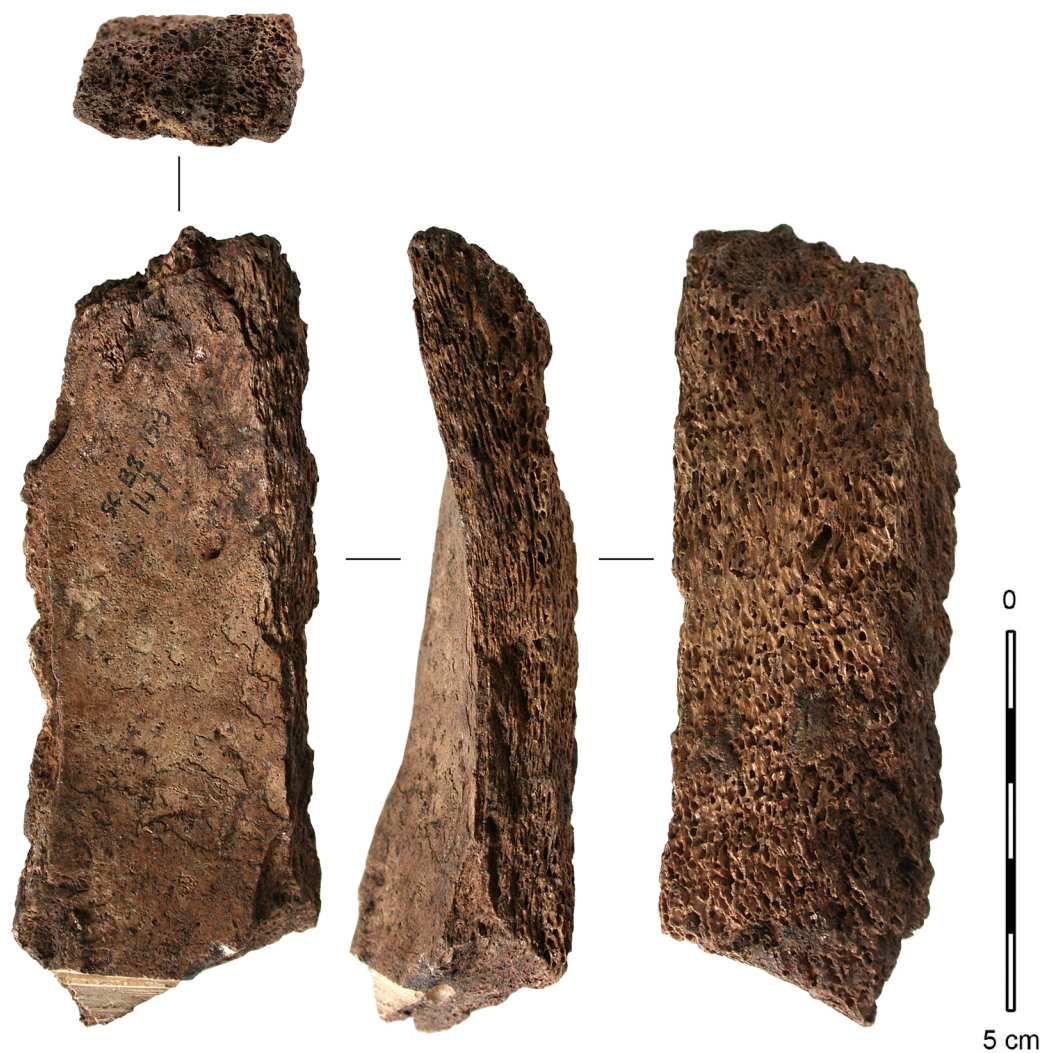



**Supplementary Figure 83**

Study number: SC B8 154 129

Museum number: SC B8 154 129

Site and layer: Santa Catalina III

Typology: unworked

ZooMS ID: Fin whale

$^{14}\text{C}$  date: MUSE20071,  $13130 \pm 60$  BP, 15811-15246 cal BP  
(photograph taken after sampling)

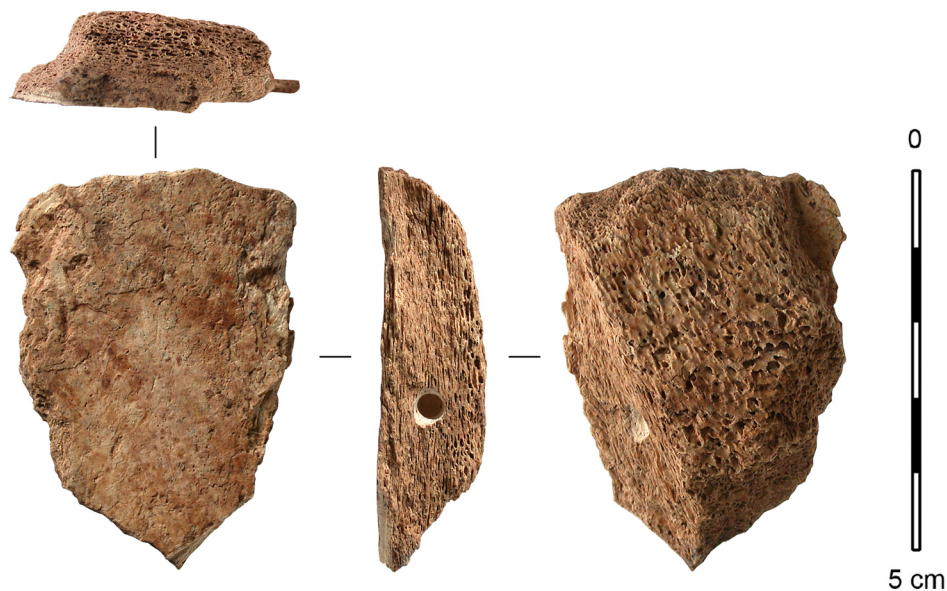**Supplementary Figure 84**

Study number: SC B8 154 150

Museum number: SC B8 154 150

Site and layer: Santa Catalina III

Typology: unworked

ZooMS ID: Fin whale / Gray whale / Humpback whale

$^{14}\text{C}$  date: MUSE20048, failed

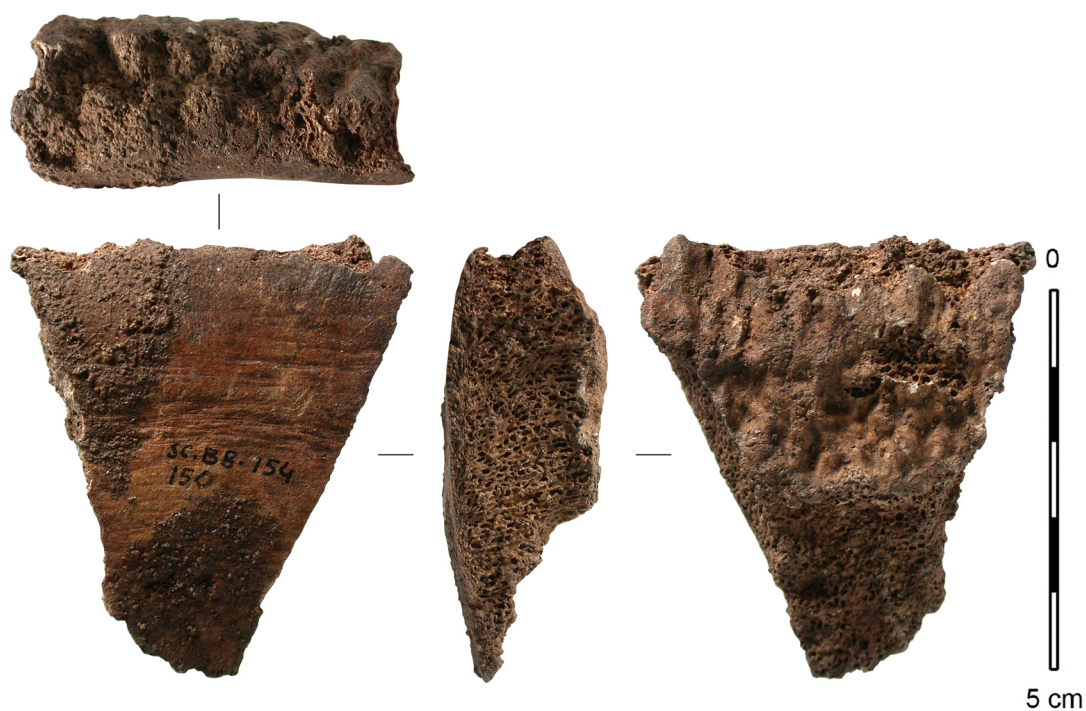

**Supplementary Figure 85**

Study number: SC B8 L31G 3932

Museum number: SC B8 L31G 3932

Site and layer: Santa Catalina III

Typology: unworked

ZooMS ID: Fin whale

<sup>14</sup>C date: none

(scale 1:2)

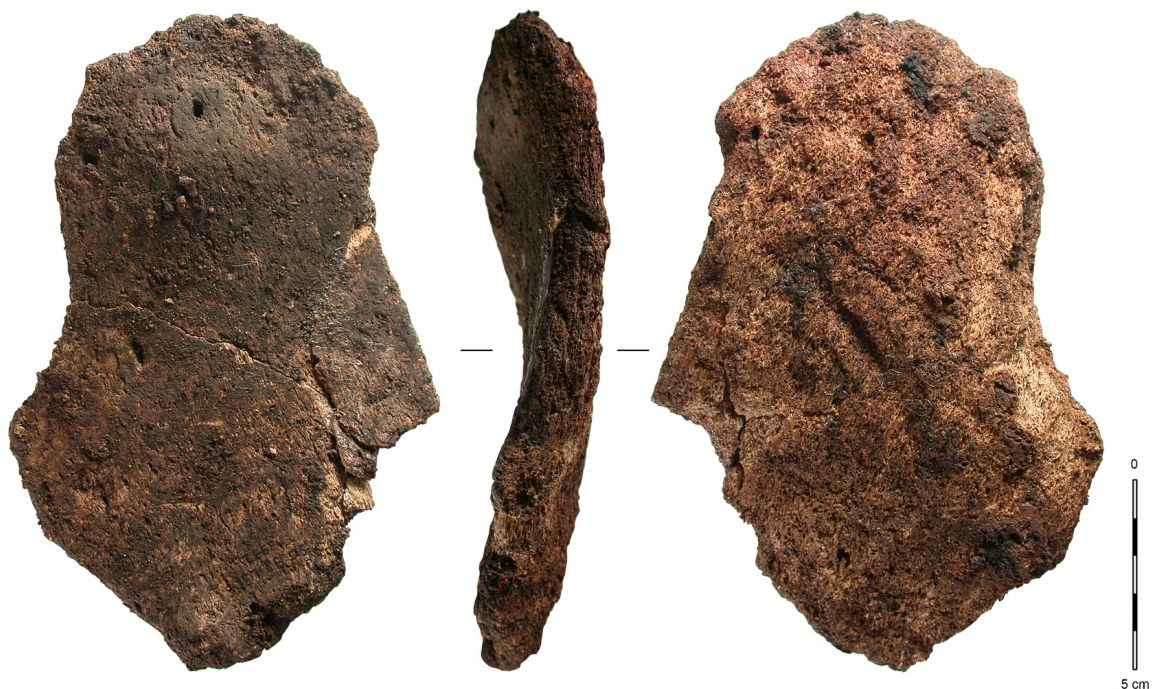**Supplementary Figure 86**

Study number: SC B8 L31H 2251

Museum number: SC B8 L31H 2251

Site and layer: Santa Catalina III

Typology: unworked

ZooMS ID: Fin whale

<sup>14</sup>C date: none

(photograph taken after sampling)

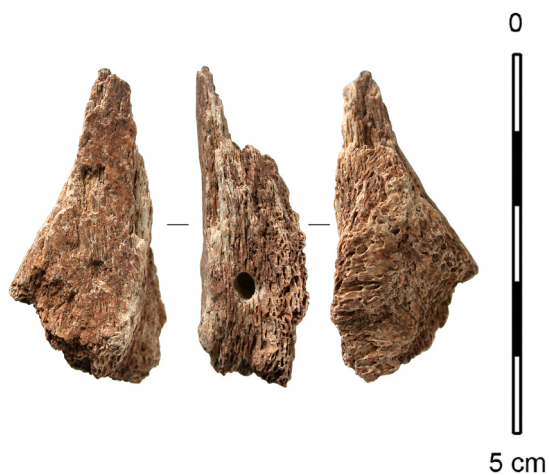

**Supplementary Figure 87**

Study number: SC C4 L29 229

Museum number: SC C4 L29 229

Site and layer: Santa Catalina II

Typology: blank?

ZooMS ID: Right whale / Bowhead whale

<sup>14</sup>C date: none

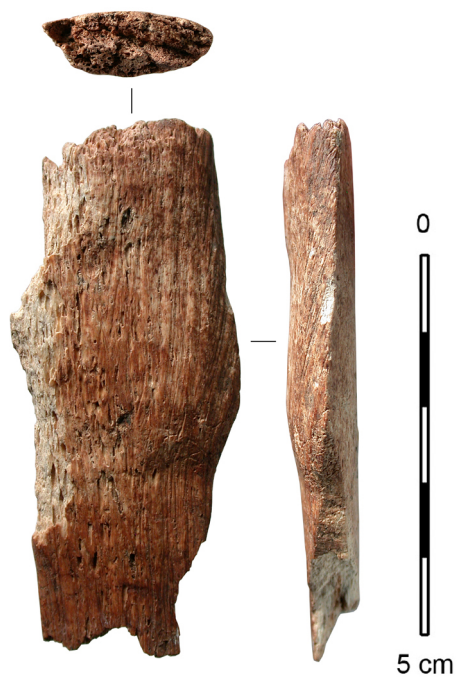

**Supplementary Figure 88**

Study number: SC C6 159 1

Museum number: SC C6 159 1

Site and layer: Santa Catalina III

Typology: unworked

ZooMS ID: Fin whale

<sup>14</sup>C date: MUSE20042, 13060 ± 50 BP, 15699-15177 cal BP

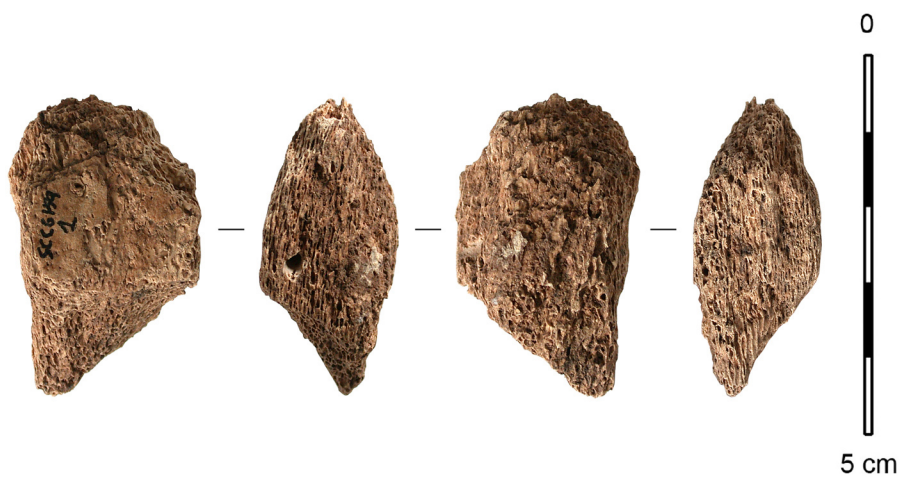



**Supplementary Figure 89**

Study number: SC C8 149 354

Museum number: SC C8 149 354

Site and layer: Santa Catalina III

Typology: unworked

ZooMS ID: Fin whale

$^{14}\text{C}$  date: MUSE20074,  $13060 \pm 50$  BP, 15699-15151 cal BP  
(photograph taken after sampling)

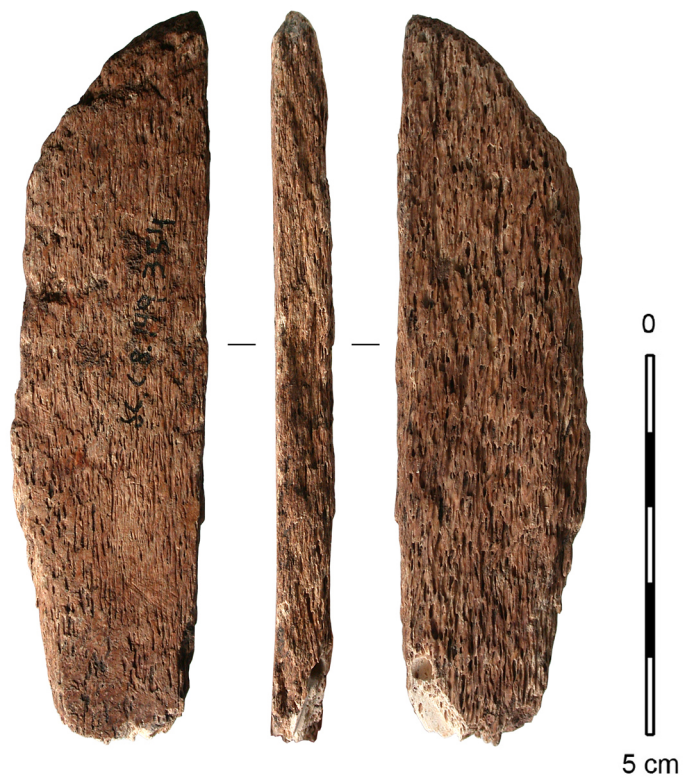

**Supplementary Figure 90**

Study number: SC C8 158 130

Museum number: SC C8 158 130

Site and layer: Santa Catalina III

Typology: unworked

ZooMS ID: Fin whale

<sup>14</sup>C date: MUSE20128, 12810 ± 60 BP, 15390-14844 cal BP  
(photograph taken after sampling)

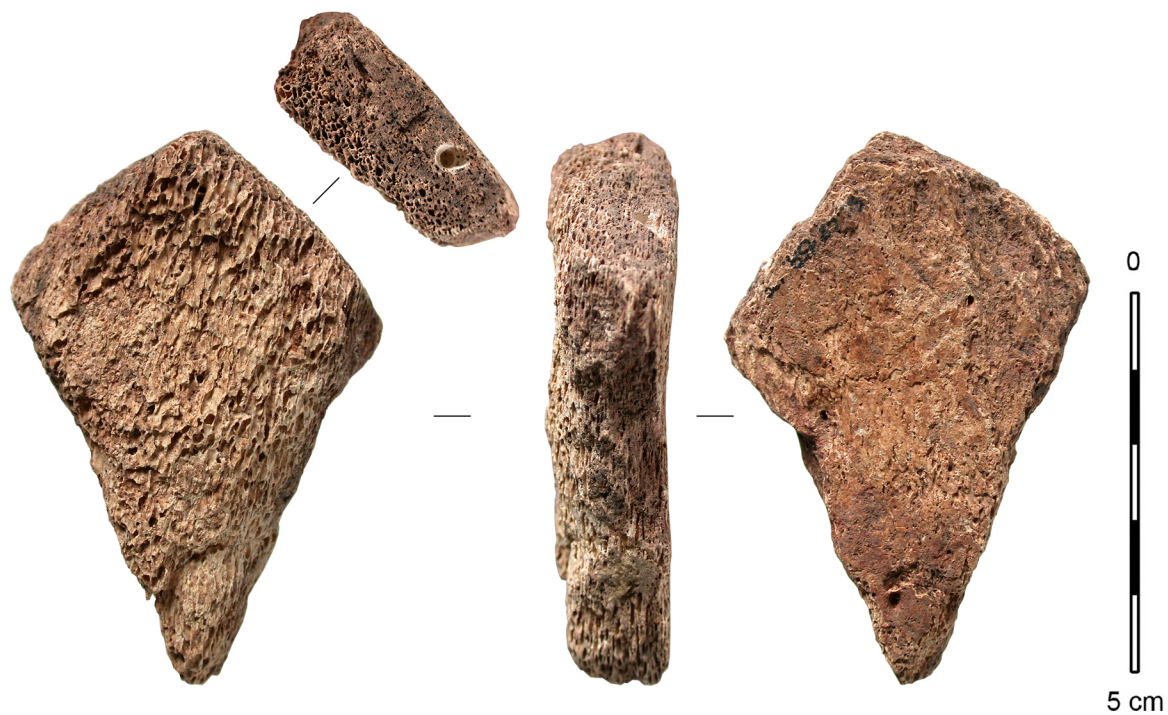



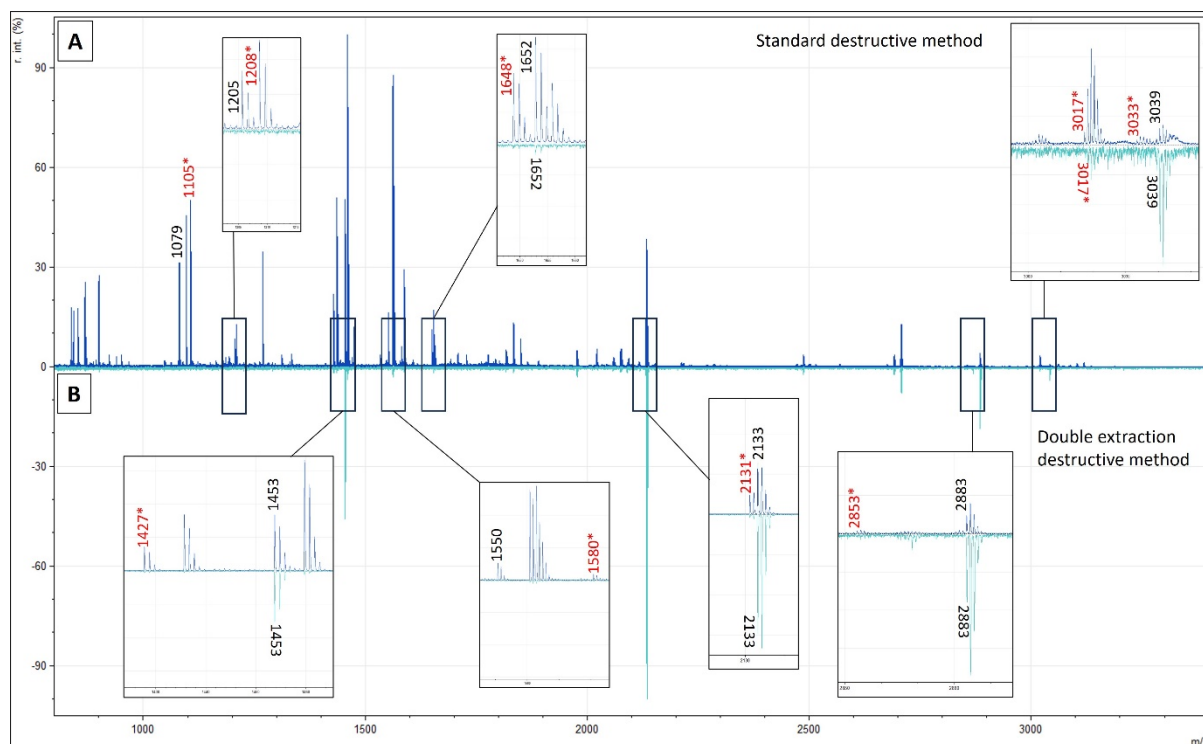

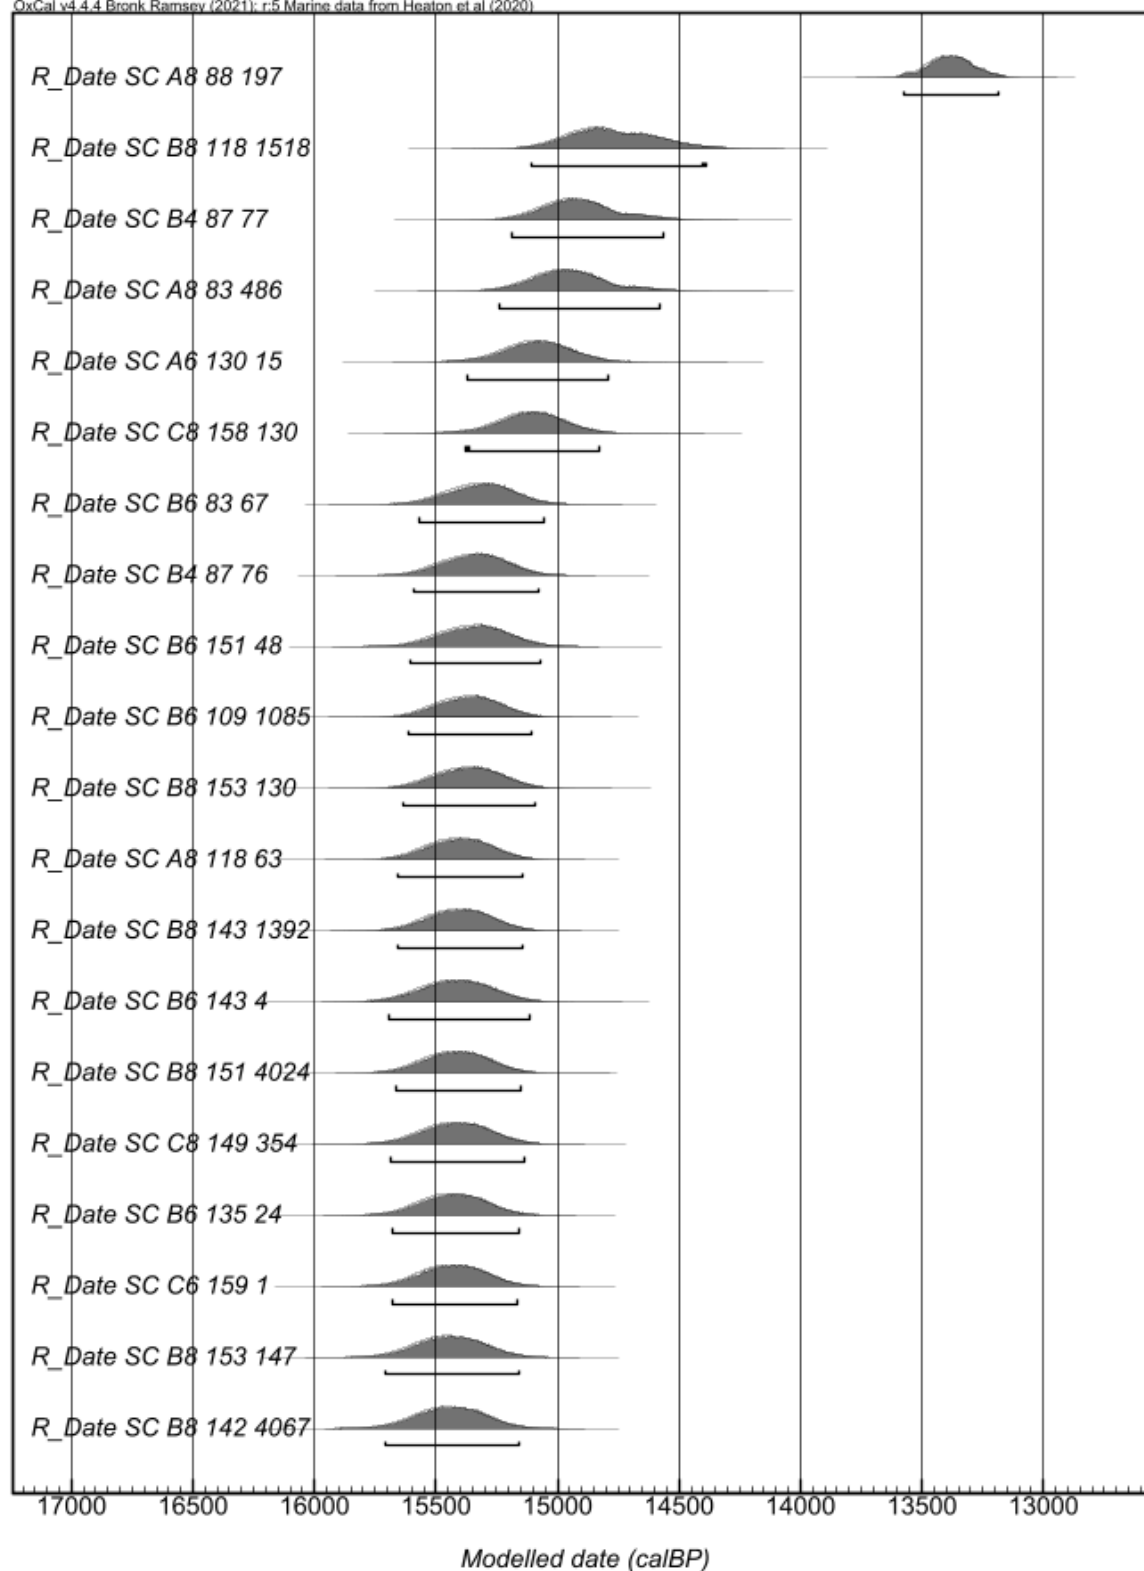

**Supplementary Figure 92.** Calibrated and reservoir corrected  $^{14}\text{C}$  ages of the whale samples in OxCal 4.4 (Bronk Ramsey 2009), from youngest to oldest. Samples from the site of Santa Catalina (Part I). See Supplementary Data 1 for source data and more information on each sample, including species. See Supplementary Code 1 file for source code.

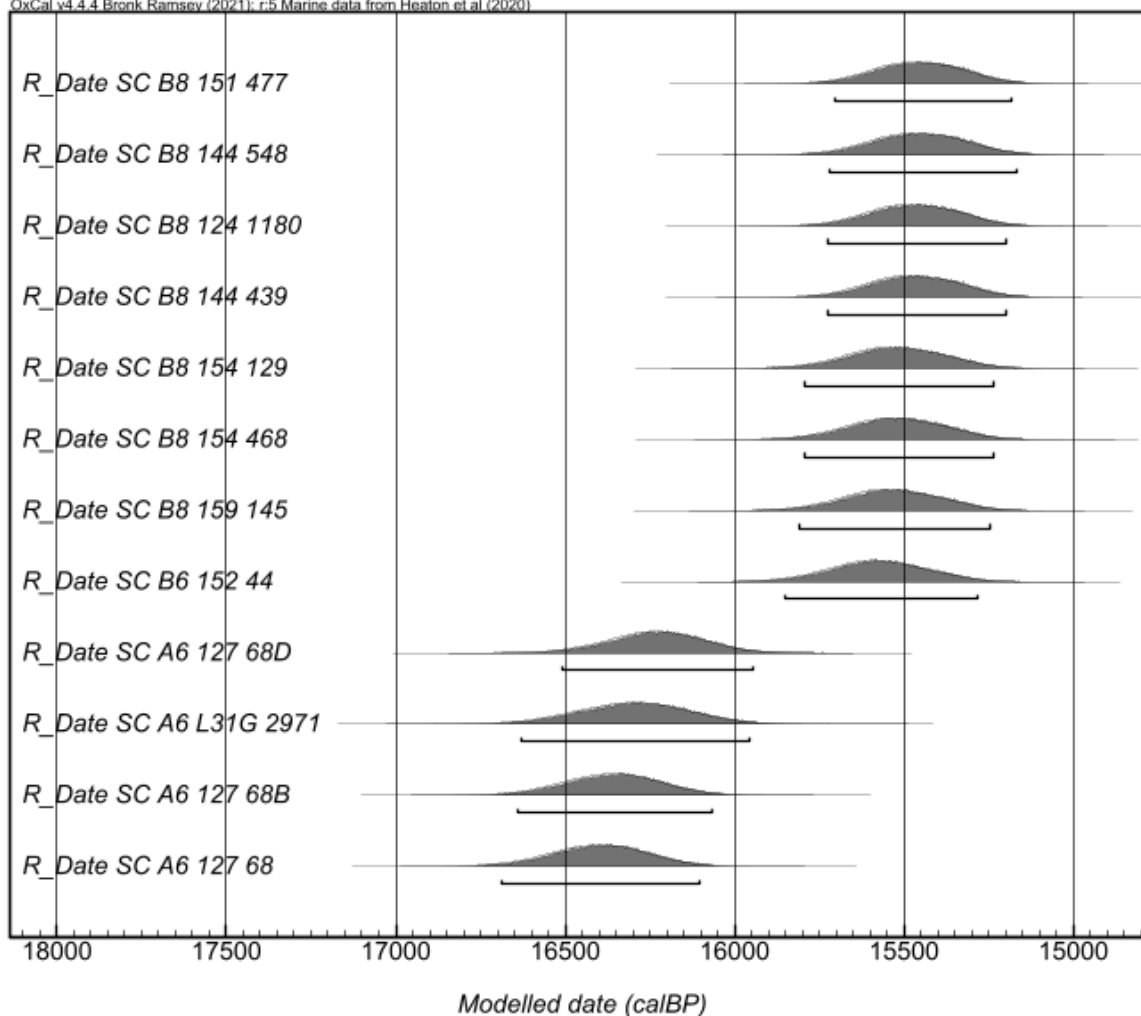

**Supplementary Figure 93.** Calibrated and reservoir corrected  $^{14}\text{C}$  ages of the whale samples in OxCal 4.4 (Bronk Ramsey 2009), from youngest to oldest. Samples from the site of Santa Catalina (Part II). See Supplementary Data 1 for source data and more information on each sample, including species. See Supplementary Code 1 file for source code.

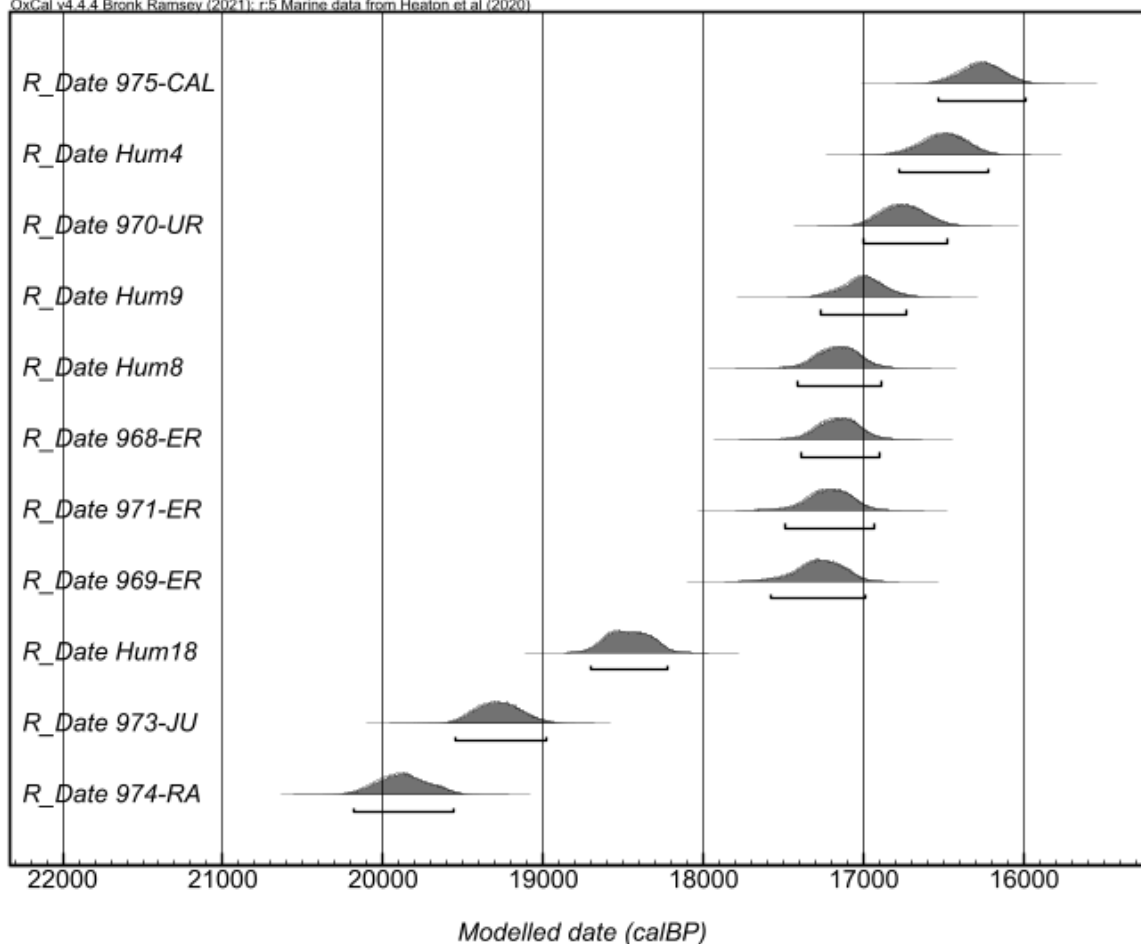

**Supplementary Figure 94.** Calibrated and reservoir corrected  $^{14}\text{C}$  ages of the whale samples in OxCal 4.4 (Bronk Ramsey 2009), from youngest to oldest. Samples from the Cantabrian sites. See Supplementary Data 1 for source data and more information on each sample, including species. See Supplementary Code 1 file for source code.

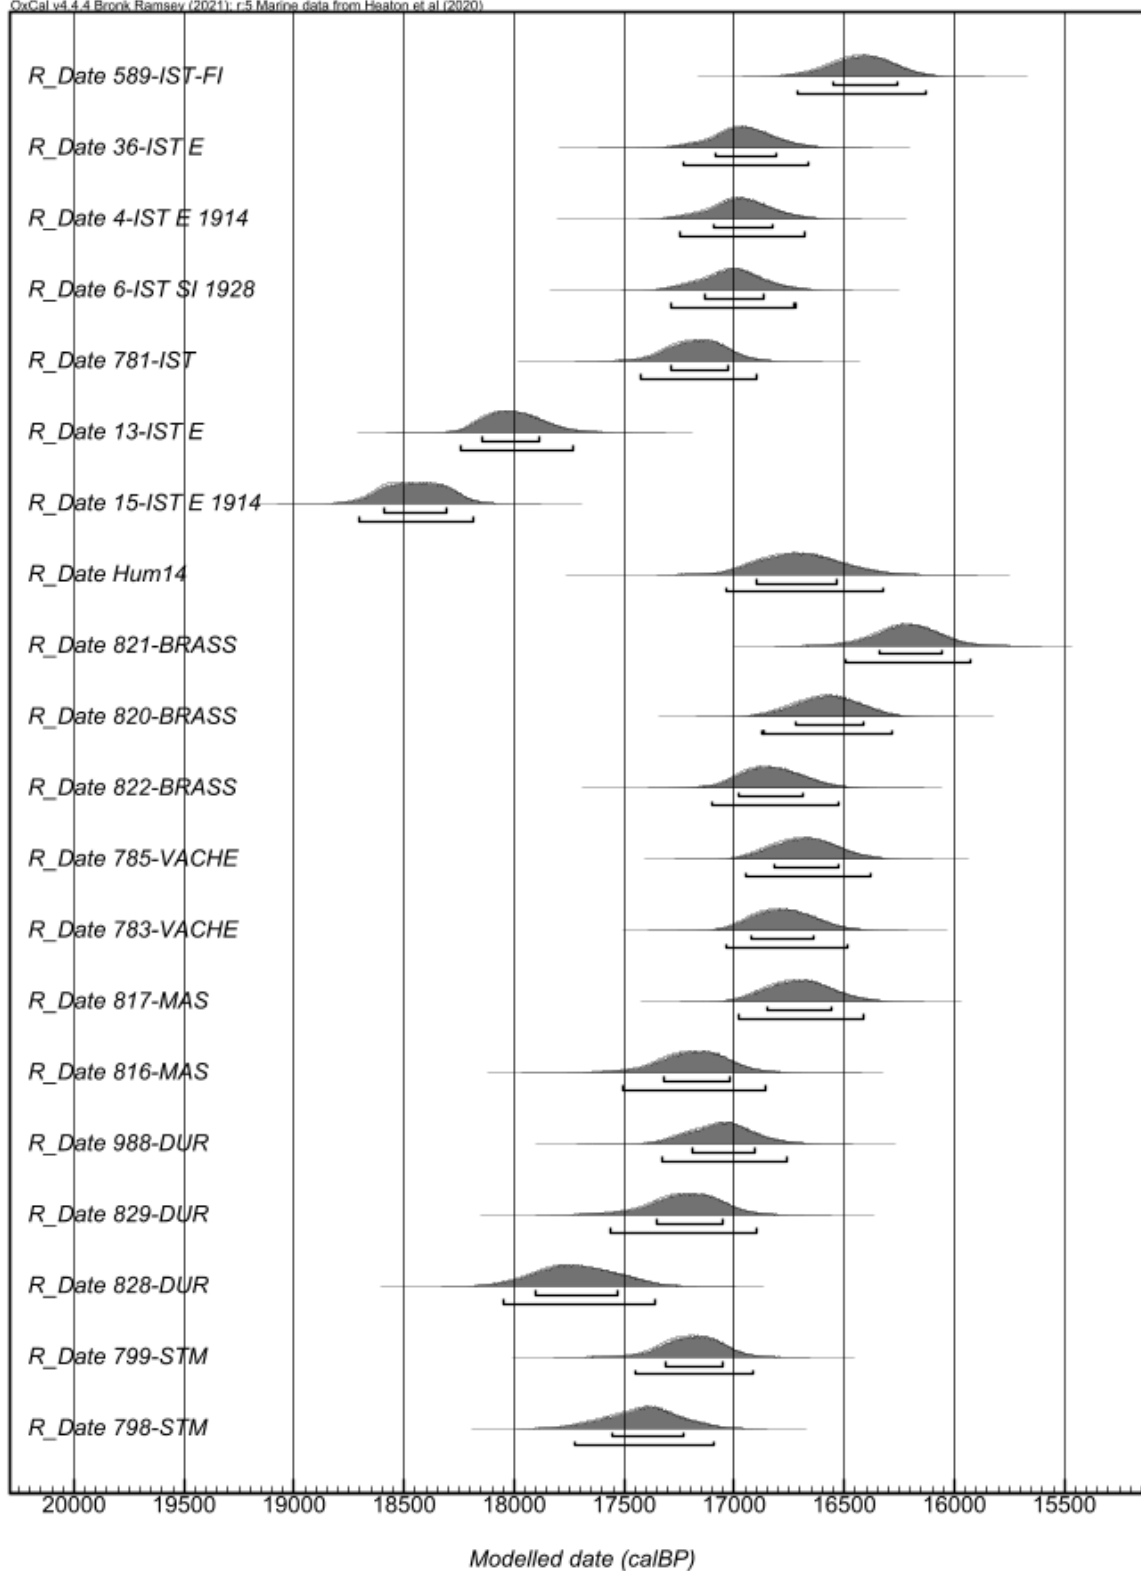

**Supplementary Figure 95.** Calibrated and reservoir corrected  $^{14}\text{C}$  ages of the whale samples in OxCal 4.4 (Bronk Ramsey 2009), from youngest to oldest. Samples from the French sites. See Supplementary Data 1 for source data and more information on each sample, including species. See Supplementary Code 1 file for source code.



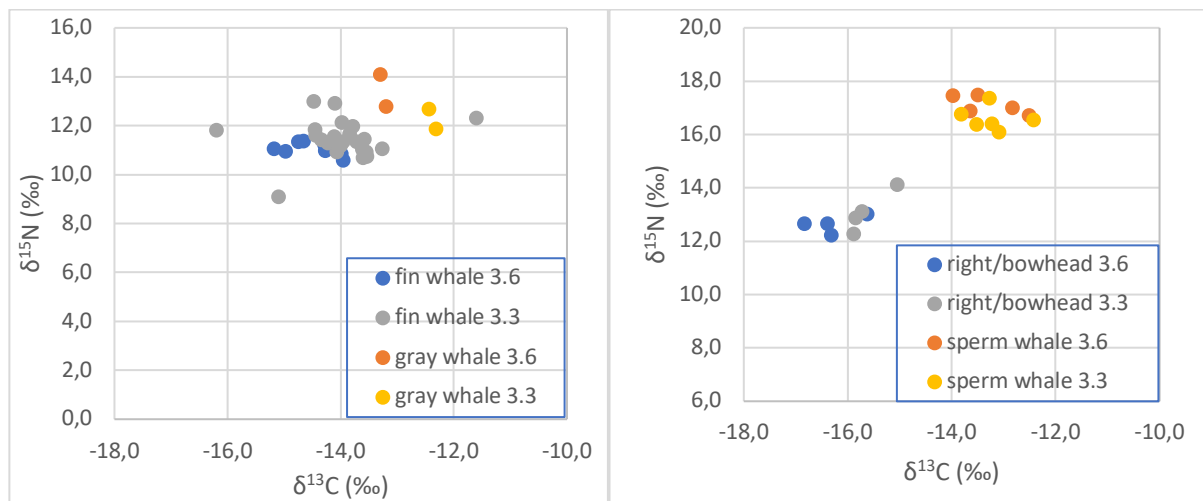

**Supplementary Figure 96.**  $\delta^{13}\text{C}$  and  $\delta^{15}\text{N}$  ratios of Paleolithic whales (this study), showing the differences between the different atomic CN ratios per species. Number of specimens: fin whale = 31; gray whale = 4; right/bowhead whale = 8; sperm whale = 11. See Supplementary Data 4, tab “PaleoCet material”, for source data.

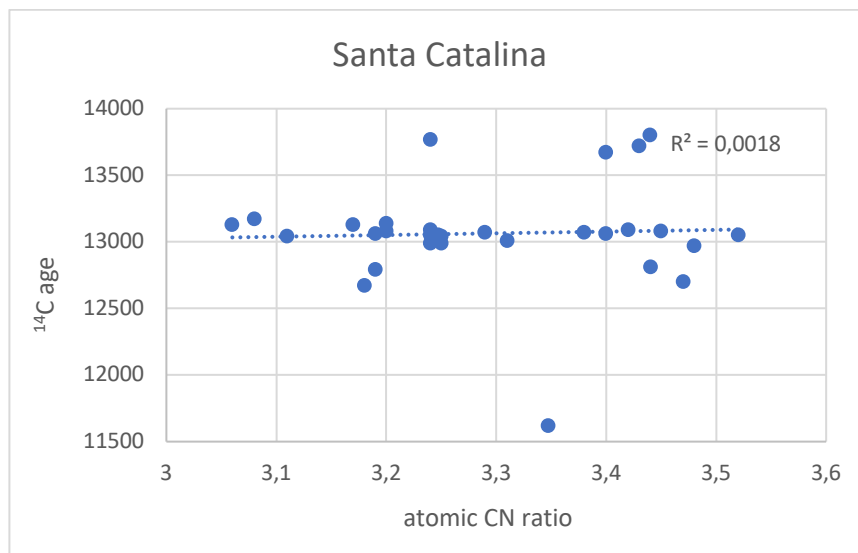

**Supplementary Figure 97.**  $^{14}\text{C}$  ages plotted against the atomic CN ratio of material from the site of Santa Catalina. A correlation between the two might indicate contamination, which is not the case. Number of specimens = 30. See Supplementary Data 4, tab “PaleoCet material”, for source data.

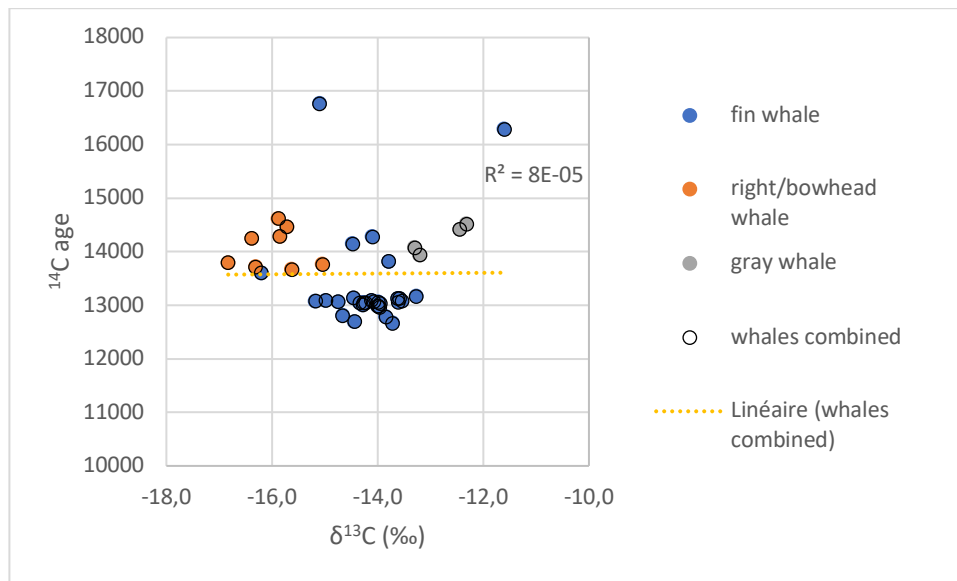

**Supplementary Figure 98.** Relationship between  $\delta^{13}\text{C}$  ratios and conventional  $^{14}\text{C}$  ages among the analyzed bones of fin, gray and right/bowhead whales. Number of specimens: fin whale = 31; gray whale = 4; right/bowhead whale = 8. See Supplementary Data 4, tab “PaleoCet material”, for source data.

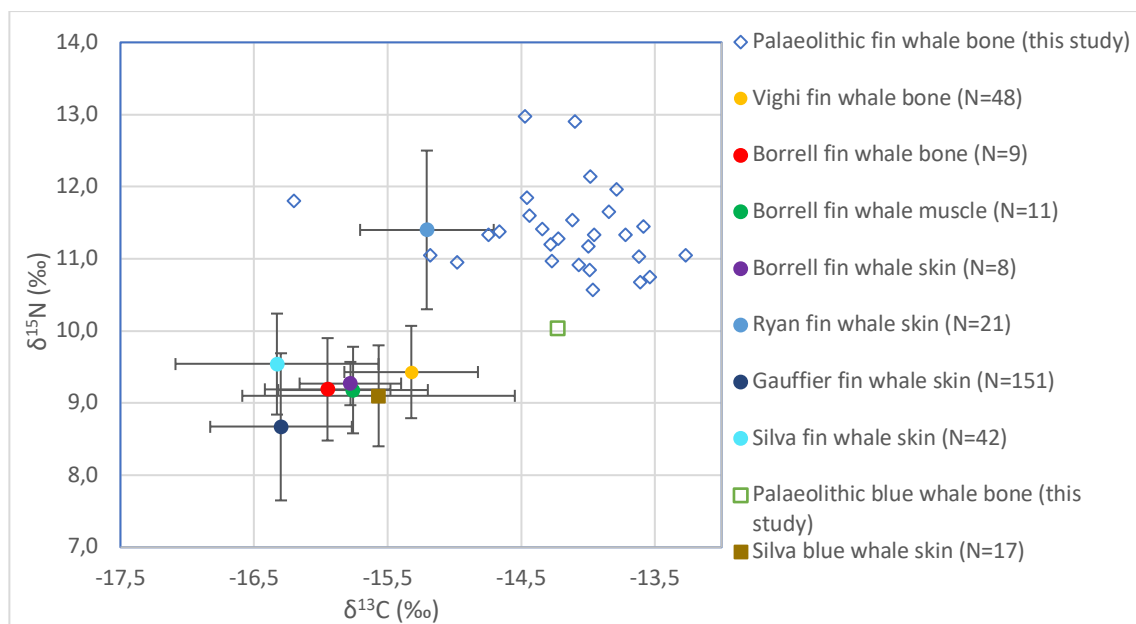

**Supplementary Figure 99.**  $\delta^{13}\text{C}$  and  $\delta^{15}\text{N}$  ratios from the studied Paleolithic fin whales and blue whale compared with stable isotope values from modern whales from the Atlantic Ocean (after applying Suess effect and, if applicable, tissue corrections)<sup>1,2,3,4,5</sup>. Whiskers represent errors bars on average values. See Supplementary Data 4 for source data.

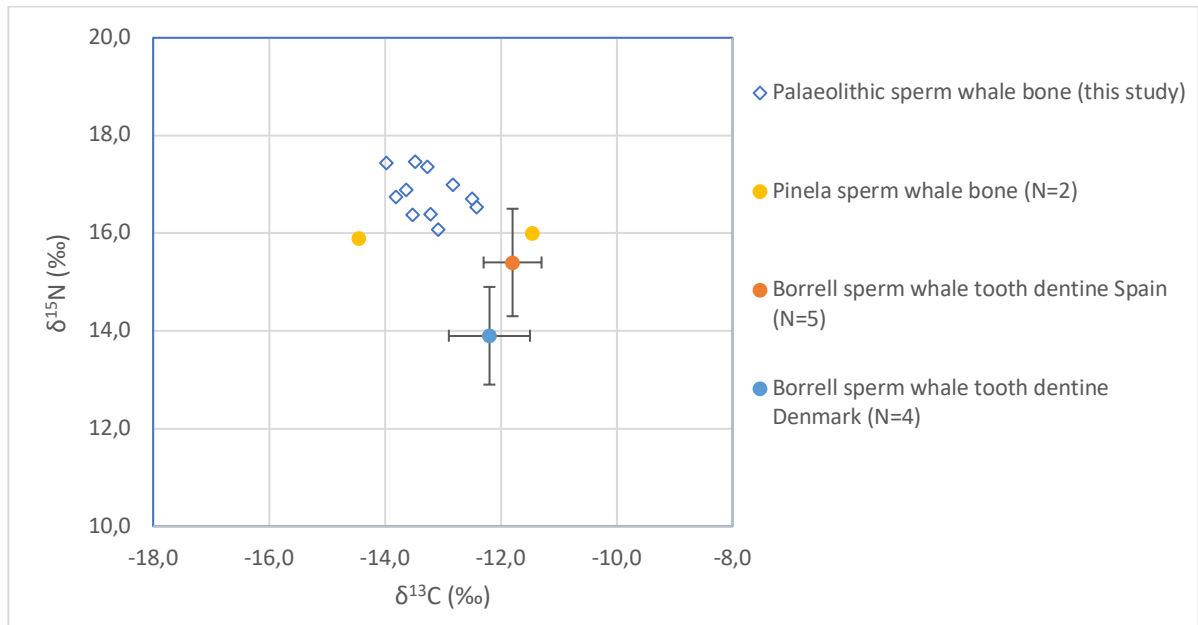

**Supplementary Figure 100.**  $\delta^{13}\text{C}$  and  $\delta^{15}\text{N}$  ratios from the studied Paleolithic sperm whales compared with stable isotope values from modern whales from the Atlantic<sup>6,1</sup> (after applying Suess effect and, if applicable, tissue corrections). Whiskers represent errors bars on average values. See Supplementary Data 4 for source data.

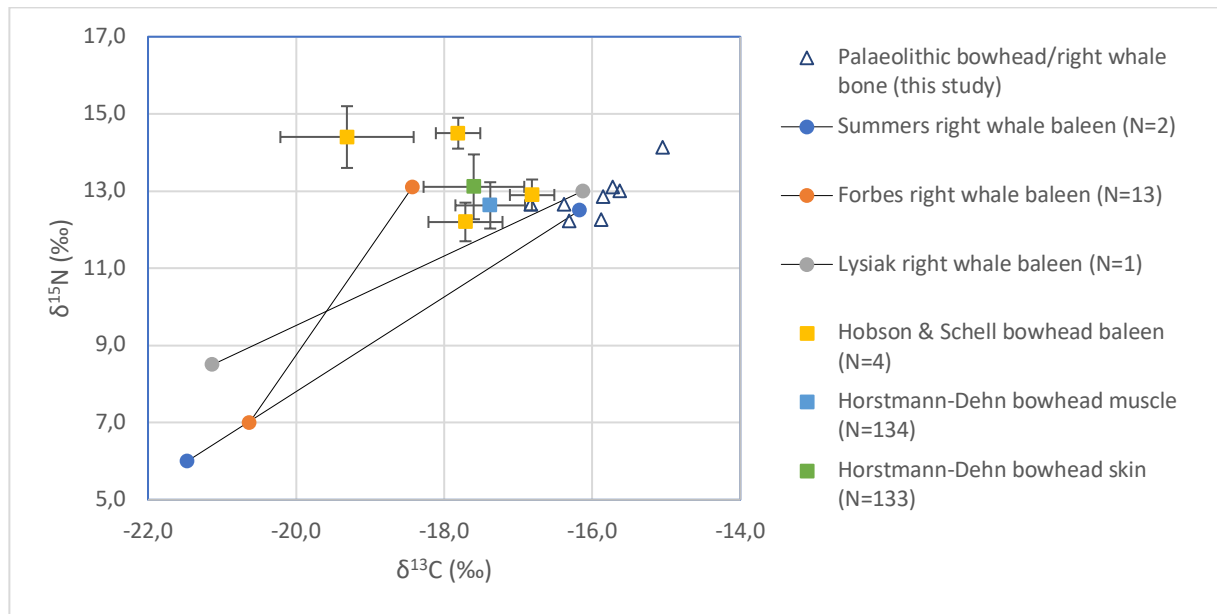

**Supplementary Figure 101.**  $\delta^{13}\text{C}$  and  $\delta^{15}\text{N}$  ratios from the studied Paleolithic bowhead/north Atlantic right whales compared with stable isotope values from modern whales from the Atlantic Ocean (right whales)<sup>7,8,9</sup> and Canadian Arctic (bowhead whales)<sup>10,11</sup> (after applying Suess effect and, if applicable, tissue corrections). Whiskers represent errors bars on average values, while values from Summers, Forbes and Lysiak present the observed range, connecting the lowest and highest values with a thin line (averages were not available). See Supplementary Data 4 for source data.

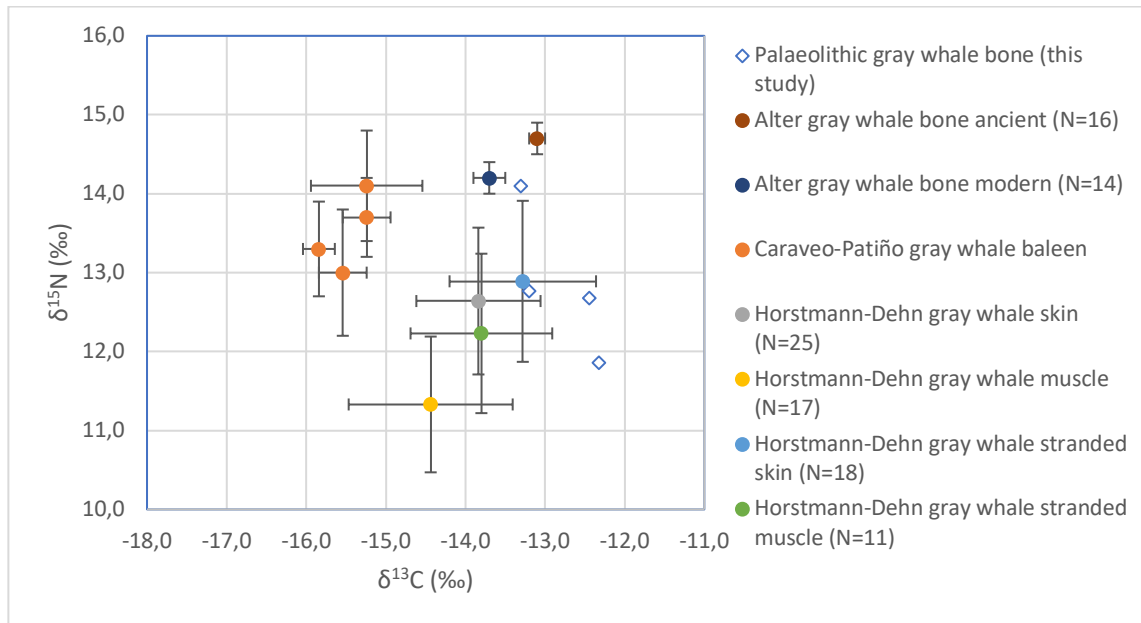

**Supplementary Figure 102.**  $\delta^{13}\text{C}$  and  $\delta^{15}\text{N}$  ratios from the studied Paleolithic gray whales compared with stable isotope values from ancient gray whales<sup>12</sup>, modern whales from the Pacific Ocean<sup>13,11</sup> (after applying Suess effect and, if applicable, tissue corrections). Whiskers represent errors bars on average values. See Supplementary Data 4 for source data.

## Supplementary Discussion: Comparing stable isotope signatures in Paleolithic versus modern whales

We compared the stable isotope ratios obtained for samples of Paleolithic whales in our dataset with ratios reported in the literature for modern counterparts. Teixeira et al.<sup>14</sup> outline useful guidelines for stable isotope analysis in cetacean research, underlining especially the difficulties when comparing data obtained using different tissues (muscle/skin/baleen/bone), the need for a Suess effect correction, tissue pretreatment (lipid removal), and considering intra- and inter-individual variation. We discuss below how we took into account each of these points.

### *Tissue corrections*

Numerous previous studies applied stable isotope analysis to modern whale tissues, although typically on muscle, skin or baleen. A tissue correction is needed for making these values comparable with bone collagen stable isotope data. Schoeninger and Moore<sup>15</sup> report that the offset between muscle and bone collagen in  $\delta^{13}\text{C}$  ratios is circa 2‰<sup>16,17</sup>. Fischer et al.<sup>18</sup> analyzed carbon and nitrogen stable isotope ratios on bone collagen and flesh of modern fish in Denmark, finding flesh-bone offsets of  $2.1 \pm 0.6\text{‰}$  for  $\delta^{13}\text{C}$  ratios and  $-0.6 \pm 0.4\text{‰}$  for  $\delta^{15}\text{N}$  ratios. Borrell et al.<sup>1</sup> analyzed the stable isotope ratios of various tissues from fin whales caught between 1983 and 1985 from the Caneliñas whaling station off the coast of Northwest Spain. For bone protein from 9 individuals they found averages of  $\delta^{13}\text{C} = -16.46 \pm 0.47\text{‰}$  and  $\delta^{15}\text{N} = 9.19 \pm 0.71\text{‰}$ , and for muscle from 11 individuals of  $\delta^{13}\text{C} = -18.27 \pm 0.56\text{‰}$  and  $\delta^{15}\text{N} = 9.88 \pm 0.58\text{‰}$ , and skin values of  $\delta^{13}\text{C} = -18.29 \pm 0.38\text{‰}$  and  $\delta^{15}\text{N} = 9.97 \pm 0.30\text{‰}$ . This gives a muscle-bone offset of 1.81‰ for  $\delta^{13}\text{C}$  ratios and -0.69 for  $\delta^{15}\text{N}$  ratios and for skin-bone 1.83‰ for  $\delta^{13}\text{C}$  ratios and -0.79 for  $\delta^{15}\text{N}$  ratios. Based on these values from the literature, we opted for the corrections for both muscle-bone and skin-bone of 2‰ for  $\delta^{13}\text{C}$  ratios and of -0.7‰ for  $\delta^{15}\text{N}$  ratios.

Baleen is constructed of highly mineralized keratin<sup>19</sup>, which is similar to bone collagen or dentine in composition, and therefore we considered that results of stable isotope analyses from baleen are directly comparable to those obtained from bone. While bone remodels and provides an average of many years, baleen plates grow continuously at the base whilst being eroded away at the tip<sup>20</sup>. Baleen tissue thus represents an archive of information about the animal's life history from the last 2 (gray whale<sup>13</sup>) to 20 years (bowhead whale<sup>21</sup>), depending on species, baleen length and growth rates, making it a very useful tissue to examine changes in foraging through fine time scales such as seasons.

### *Suess Effect correction*

Comparing modern samples with archaeological or historic samples requires a correction to the  $\delta^{13}\text{C}$  ratios for the Suess Effect, which involves the incorporation of largely depleted carbon into the atmosphere through the burning of fossil fuels since the industrial revolution<sup>22</sup>. We used the SuessR package<sup>23</sup> to calculate the correction needed based on the region and year of sample collection (Supplementary Data 4).

### *Tissue pretreatment*

Bas et al.<sup>24</sup> examined the combined effect of delipidation and demineralization on the stable isotope results of sea lion and dusky dolphin bones. Their samples were either left untreated or were treated with a chloroform and methanol solution, followed by demineralization with HCl acid. They found atomic CN ratios above 3.6 for untreated samples, indicating the presence of lipids and/or carbonates. Compared with pretreated samples, all untreated samples had lower  $\delta^{13}\text{C}$  (differences were ranging from 0.3 to 2 ‰), while this varied for  $\delta^{15}\text{N}$  ratios (differences were ranging from +0.2 to -1.3 ‰). Das et al.<sup>25</sup> had the same findings for  $\delta^{13}\text{C}$  ratios on skin samples. All skin and muscle samples in the literature used for this comparison applied a lipid removal step but no demineralization step. Baleen samples were often subjected to lipid removal (3 out of 5) but not to demineralization. Bone and tooth dentine were treated in a variety of ways in the literature, precluding the application of a systematic correction.

### *Intra- and inter-individual variation*

Smith et al.<sup>26</sup> investigated intra-skeletal stable isotope variability in 72 cetacean skeletons from 14 species. They found that for 84.7% of the individuals there was >1‰ variability in  $\delta^{13}\text{C}$  ratios, and for 55.5% >2‰ variability. Regarding  $\delta^{15}\text{N}$  ratios, 59.7% of the individuals had >1‰ and 15.3% >2‰ variability. The authors assume that variation >1‰ in  $\delta^{13}\text{C}$  ratios and >2‰ in  $\delta^{15}\text{N}$  ratios reflects changes in foraging behavior. Borrell et al.<sup>1</sup> analyzed muscle tissues of a large number of individuals (n=65) of fin whale, finding no significant age-related variation (4-65 years), nor significant sex-related differences (n=55 males, n=10 females) in stable isotope values, deducing that this absence of individual variation reflects a consistent use of the same feeding grounds and a similar diet (almost exclusively krill) by different age groups and sexes. Muscle tissue from bowheads in the eastern Arctic showed no age-related isotopic differences, while their baleen revealed that subadult whales feed slightly more in nearshore waters, resulting in lower  $\delta^{13}\text{C}$  ratios, compared with adults in deeper waters<sup>27</sup>. A significant negative correlation was found between age and  $\delta^{15}\text{N}$  ratios for bowheads, with fetuses and juveniles having higher  $\delta^{15}\text{N}$  ratios than adults, which is most likely due to milk consumption<sup>11</sup>. It was not possible to take intra- or inter-individual stable isotope variability into account in our analysis.



## Fin whales

We contrasted stable isotope ratios obtained from our Paleolithic samples of fin whales ( $n = 30$ ) with values obtained from modern fin whales in the eastern North Atlantic (after applying Suess effect corrections and, when necessary, tissue corrections) originating from bone samples (9 individuals<sup>1</sup> + 48 individuals<sup>3</sup>), muscle samples (11 individuals<sup>1</sup>) and skin samples (8 individuals<sup>1</sup> + 21 individuals<sup>2</sup> + 42 individuals<sup>4</sup> + 151 individuals<sup>5</sup>).

Fin whales in our sample generally display high  $\delta^{15}\text{N}$  ratios when compared with their modern counterparts (Supplementary Figure 99), indicating that they occupied on average a higher trophic level than today's whales<sup>28</sup>, or that the  $\delta^{15}\text{N}$  baseline has significantly changed over time. When compared with the other whale species in our study, modern fin whales are considered a relative generalist predator. In the North Atlantic, their diet is dominated by zooplankton (including multiple euphausiid species) but can also include non-negligible contributions of small pelagic fishes (capelin, *Mallotus villosus*; Atlantic herring, *Clupea harengus*; sandlance, *Ammodytes* spp.<sup>29</sup>). Feeding strategies can vary across populations, among individuals of the same population, and over time in response to environmental change. For example, an analysis of stable isotope ratios in skin and blubber of 99 fin whales in the Saint Lawrence Estuary over 1998-2006<sup>29</sup> found that the population was initially dominated by two types of specialists (individuals focused either on krill or on lipid-rich pelagic fishes). It then shifted toward one composed either of krill specialists or (for about 66% of the individuals) true generalists feeding on various zooplankton and fish prey, a change that coincided with a decrease in biomass of their predominant prey, Arctic krill (*Thysanoessa* spp.). Previous studies also found variation in  $\delta^{15}\text{N}$  ratios in baleen and muscle samples that reflect seasonal variation in feeding strategies of these highly migratory species: Aguilar et al.<sup>30</sup> (using part of the same dataset as Borrell et al.<sup>1</sup> but only looking at males) found higher  $\delta^{15}\text{N}$  ratios during periods of intense feeding (at high latitudes), that decreased during fasting (migration and calving seasons), whereas Rita et al.<sup>31</sup> found that  $\delta^{15}\text{N}$  ratios were higher in winter than in summer. Stable isotope ratios obtained from bones reflect the integration of feeding strategies over years. Accordingly, the relatively high  $\delta^{15}\text{N}$  ratios in Paleolithic samples could indicate that on average fin whales' diets integrated relatively high fractions of fish when compared to today's whales, which may have been related to the different environmental circumstances.

The Paleolithic whales also exhibit high  $\delta^{13}\text{C}$  ratios when compared with modern counterparts (Supplementary Figure 99).  $\delta^{13}\text{C}$  ratios in marine waters vary geographically, with a tendency to decline from coastal and benthic areas to offshore and pelagic areas, and towards polar latitudes<sup>32</sup>. The higher  $\delta^{13}\text{C}$  ratios in ancient whales may thus indicate a tendency to rely more on coastal and/or on more tropical and subtropical areas than today's populations.

## Blue whales

We contrasted stable isotope ratios of the single blue whale bone sample in our study with skin from 17 blue whale individuals analyzed by Silva et al.<sup>4</sup>, corresponding to blue whales migrating through the Azores and likely reflecting winter and spring feeding grounds in the Northwest African upwelling and pelagic tropical/subtropical regions. The ancient blue whale shows higher  $\delta^{13}\text{C}$  and  $\delta^{15}\text{N}$  values than its modern counterparts, and isotopically appears to fall in between the modern and ancient fin whales (Supplementary Figure 99). Modern blue whales are considered dietary specialists, feeding almost exclusively on krill (*Meganyctiphanes norvegica*, *Thysanoessa raschii* and *T. inermis*)<sup>4</sup>. They mostly feed in high-latitude summer grounds, and fast during migration to and from low latitude winter calving areas, but there is evidence of year-round feeding<sup>33</sup>.

## Sperm whales

We contrasted stable isotope ratios obtained from our Paleolithic bone samples of sperm whales ( $n = 11$ ) with values obtained from modern sperm whales from the Atlantic (2 bone samples<sup>6</sup> + 9 tooth dentine samples<sup>1</sup>) after applying tissue and Suess effect corrections.

We found overlapping ranges of  $\delta^{13}\text{C}$  ratios between modern and ancient whales, with the latter falling on the higher end of the  $\delta^{15}\text{N}$  ratios range in relation to the former (Supplementary Figure 100). Sperm whales are dominant predators of the mesopelagic ocean, preying on many of the larger meso- and bathy-pelagic species of the deep ocean, including cephalopods and fish<sup>34</sup>. Modern sperm whales in the North Atlantic are highly structured by sex and age, with females and young whales found in tropical and temperate waters whereas older males progressively move towards higher latitudes (migrating periodically southwards for reproduction)<sup>34,35</sup>. Both males and females are currently found off NW Spain<sup>35</sup>, but it is plausible that in the cooler Paleolithic oceans the area would have been dominated by older males and this could perhaps explain the higher  $\delta^{15}\text{N}$  ratios in Paleolithic samples. Indeed, previous studies found that  $\delta^{15}\text{N}$  ratios (measured in tooth dentine) tend to increase with age in males, attributed to the increasing strength and diving capacity that individuals acquire when growing old, which allow them to progressively feed on bigger prey (mostly giant squids) at higher trophic levels<sup>35</sup>. In contrast, an opposite trend (or no age effect) has been observed for females, possibly explained by a tendency to reduce the depth of dives (thus a shift to shallower and smaller prey) during pregnancy and lactation<sup>35</sup>.

### *Right/bowhead whales*

As we were unable to distinguish between bowhead whale and North Atlantic right whale through ZooMS, we compared the stable isotope signatures of Paleolithic samples identified as one of these species ( $n=8$ ) with those of modern North Atlantic right whales (baleen of two individuals analyzed by Summers et al.<sup>7</sup>; 13 by Forbes et al.<sup>9</sup>; and one by Lysiak et al.<sup>8</sup>) and bowheads from the Canadian Arctic (baleen from 4 individuals from Hobson and Schell<sup>10</sup>; muscle from 134 individuals and skin from 133 individuals from Horstmann-Dehn et al.<sup>12</sup>).

Modern bowhead whales and right whales are specialists that feed mainly on calanoid copepod species (most commonly, and respectively, *Calanus hyperboreus* and *Calanus finmarchicus*), but they can also feed on other mesozooplankton species at a higher trophic level (e.g. mysids, euphausiids, chaetognaths)<sup>34,36</sup>. Due to their distinct feeding habitats at certain latitudes, the species' overlap in  $\delta^{13}\text{C}$  ratios is somewhat unexpected.

Modern right whales tend to have overall lower values of  $\delta^{13}\text{C}$  and  $\delta^{15}\text{N}$  ratios than modern bowhead whales, and the stable isotope signatures of Pleistocene bones overlap better with those of the later (Supplementary Figure 101). As the published studies investigating modern right whales observed stable isotopic ranges rather than averages with standard deviations, these are displayed here as such (Supplementary Figure 101). It is important to note that these ranges<sup>7,8,9</sup> cover the stable isotope value extremes (winter vs. summer feeding) and when averaged, they would most likely display lower  $\delta^{13}\text{C}$  and  $\delta^{15}\text{N}$  ratios compared with the bowhead data. Despite the partial overlap between the modern samples of both species precluding a more certain species identification of the Paleolithic bone samples, the ancient samples appear more likely to be bowheads than right whales. Although fin whales are often known to forage at a slightly higher trophic level relative to Balaenidae, when comparing modern fin whales (Supplementary Figure 99) and modern bowhead and North Atlantic right whales (Supplementary Figure 101), we found that fin whales also have lower  $\delta^{15}\text{N}$  ratios than bowhead whales and a similar range to right whales. This pattern is not only evident among ancient

whale samples but also in modern whales and can probably be explained by their different migration styles (coastal vs open ocean) and summer feeding grounds characterized by different baseline  $\delta^{15}\text{N}$  values.

### *Gray whales*

As gray whales are currently extinct in the Atlantic, we could only compare our ancient specimens ( $n=4$ ) with ancient gray whale from the Pacific (16 bone samples from 150-2690 yr BP<sup>12</sup>) and modern gray whales from the Pacific (14 bone samples<sup>12</sup>, baleen from 4 individuals<sup>13</sup>, 25 skin and 17 muscle samples from Alaskan individuals, as well as 18 skin and 11 muscle samples from individuals stranded in California<sup>11</sup>) (Supplementary Figure 102). Any differences in  $\delta^{13}\text{C}$  ratios may be due to the large geographic distance, although the  $\delta^{15}\text{N}$  ratios overlap considerably, potentially indicating similar foraging preferences. Modern Pacific gray whales are highly coastal, feeding in shallow Arctic and subarctic benthic environments, primarily on tube-dwelling ampeliscid amphipods, polychaete worms and bivalves<sup>34</sup>.

**Supplementary references: references cited in the captions of Supplementary Figures 99 through 102, or in the Supplementary Discussion.**

1. Borrell, A., Abad-Oliva, N., Gómez-Campos, E., Giménez, J., Aguilar, A. 2012. Discrimination of stable isotopes in fin whale tissues and application to diet assessment in cetaceans, *Rapid Communications in Mass Spectrometry* 26, 1596–1602.
2. Ryan, C., Berrow, S. D., McHugh, B., O'Donnell, C., Trueman, C. N., O'Connor, I. 2013. Prey preferences of sympatric fin (*Balaenoptera physalus*) and humpback (*Megaptera novaeangliae*) whales revealed by stable isotope mixing models. *Marine Mammal Science* 30(1), 242–258. <https://doi.org/10.1111/mms.12034>
3. Vighi, M., Borrell, A., Aguilar, A., 2016. Stable isotope analysis and fin whale subpopulation structure in the eastern North Atlantic. *Marine Mammal Science* 32(2), 535–551. <https://doi.org/10.1111/mms.12283>
4. Silva, M. A., Borrell, A., Prieto, R., Gauffier, P., Bérubé, M., Palsbøl, P.J., Colaço, A. 2019. Stable isotopes reveal winter feeding in different habitats in blue, fin and sei whales migrating through the Azores. *Royal Society Open Science* 6, 181800. <https://doi.org/10.1098/rsos.181800>
5. Gauffier, P., Borrell, A., Silva, M. A., Víkingsson, G. A., López, A., Giménez, J., Colaço, A., Halldórsson, S. D., Vighi, M., Prieto, R., de Stephanis, R., Aguilar, A. 2020. Wait your turn, North Atlantic fin whales share a common feeding ground sequentially. *Marine Environmental Research* 155, 104884. <https://doi.org/10.1016/j.marenvres.2020.104884>
6. Pinela, A. M., Borrell, A., Cardona, L., Aguilar, A. 2010. Stable isotope analysis reveals habitat partitioning among marine mammals off the NW African coast and unique trophic niches for two globally threatened species. *Marine Ecology Progress Series* 416, 295–306. <https://doi.org/10.3354/meps08790>
7. Summers, E. L., Estrada, J. A., Zeeman, S. I. 2006. A note on geographic and seasonal fluctuations in the isotopic composition of baleen in four North Atlantic right whales (*Eubalaena glacialis*), *Journal of Cetacean Research and Management* 8(3), 241–245.
8. Lysiak, N. S. J., Trumble, S. J., Knowlton, A. R., Moore, M. J. 2018. Characterizing the Duration and Severity of Fishing Gear Entanglement on a North Atlantic Right Whale (*Eubalaena glacialis*) Using Stable Isotopes, Steroid and Thyroid Hormones in Baleen. *Frontiers in Marine Science* 5, 168. <https://doi.org/10.3389/fmars.2018.00168>
9. Forbes, R., Nakamoto, B., Lysiak, N., Wimmer, T., Hayden, B. 2023. Stable isotope analysis of baleen from North Atlantic right whales *Eubalaena glacialis* reflects distribution shift to the Gulf of St. Lawrence. *Marine Ecology Progress Series* 722, 177–193. <https://doi.org/10.3354/meps14428>
10. Hobson, K. A., Schell, D. M. 1998. Stable carbon and nitrogen isotope patterns in baleen from eastern Arctic bowhead whales (*Balaena mysticetus*). *Canadian Journal of Fisheries and Aquatic Sciences* 55, 2601–2607.
11. Horstmann-Dehn, L., Follmann, E. H., Rosa, C., Zelensky, G., George, C. 2012. Stable carbon and nitrogen isotope ratios in muscle and epidermis of arctic whales, *Marine Mammal Science* 28(2), E173–E190. <https://doi.org/10.1111/j.1748-7692.2011.00503.x>
12. Alter, S. E., Newsome, S. D., Palumbi, S. R. 2012. Pre-whaling genetic diversity and population ecology in eastern Pacific gray whales: insights from ancient DNA and stable isotopes. *PLoS ONE* 7, e35039. <https://doi.org/10.1371/journal.pone.0035039.g006>
13. Caraveo-Patiño, J., Hobson, K. A., Soto, L. A. 2007. Feeding ecology of gray whales inferred from stable-carbon and nitrogen isotopic analysis of baleen plates. *Hydrobiologia* 586, 17–25. <https://doi.org/10.1007/s10750-006-0477-5>
14. Teixeira, C. R., Troina, G. C., Daura-Jorge, F. G., Simões-Lopes, P. C., Botta, S. 2022. A practical guide on stable isotope analysis for cetacean research. *Marine Mammal Science* 38(3), 1200–1228.
15. Schoeninger, M., Moore, K. 1992. Bone stable isotope studies in archaeology. *Journal of World Prehistory* 6(2), 247–296.
16. Medaglia, C. C., Little, E. A., Schoeninger, M. J. 1990. Late Woodland diet on Nantucket Island: A study using stable isotope ratios. *Bulletin of the Massachusetts Archaeological Society* 51, 49–60.
17. van der Merwe, N. J. 1989. Natural variation in  $\delta^{13}\text{C}$  concentration and its effect on environmental reconstruction using  $^{13}\text{C}/^{12}\text{C}$  ratios in animal bones. In Price, T. D. (ed.), *The Chemistry of Prehistoric Human Bone*, Cambridge University Press, Cambridge, pp. 105–125.

18. Fischer, A., Olsen, J., Richards, M., Heinemeier, J., Sveinbjörnsdóttir, A. E., Bennike, P. 2007. Coast-inland mobility and diet in the Danish Mesolithic and Neolithic: evidence from stable isotope values of humans and dogs. *Journal of Archaeological Science* 34, 2125-2150.
19. Szewciw, L. J., de Kerckhove, D. G., Grime, G. W., Fudge, D. S. 2010. Calcification provides mechanical reinforcement to whale baleen alpha-keratin, *Proceedings of the Royal Society B: Biological Sciences* 277(1694), 2597-605.
20. Smith, M. E. K., Ososky, J. J., Hunt, K. E., Cioffi, W. R., Read, A. J., Friedlaender, A. S., McCarthy, M., Fleming, A. H. 2024. Historical baleen plates indicate that once abundant Antarctic blue and fin whales demonstrated distinct migratory and foraging strategies. *Ecology and Evolution* 14, e11376.
21. Schell, D. M., Saupe, S. M., Haubenstock, N. 1989. Bowhead whale (*Balaenoptera mysticetus*) growth and feeding as estimated by  $\delta^{13}\text{C}$  techniques. *Marine Biology* 103, 433-443.
22. Keeling, C. D. 1979. The Suess effect:  $^{13}\text{C}$ - $^{14}\text{C}$  interrelations. *Environment International* 2(4-6), 229-300.
23. Clark, C. T., Cape, M. R., Shapley, M. D., Mueter, F. J., Finney, B. P., Misarti, N. 2020. SuessR: Regional corrections for the effects of anthropogenic  $\text{CO}_2$  on  $\delta^{13}\text{C}$  data from marine organisms. *Methods in Ecology and Evolution* 2021:12, 1508-1520.
24. Bas, M., García, N. A., Crespo, E. A., Cardona, L. 2019. Intraskkeletal variability in stable isotope ratios of C and N among pinnipeds and cetaceans. *Marine Mammal Science* 36, 375-385.
25. Das, K., Holleville, O., Ryan, C., Berrow, S., Gilles, A., Ody, D., Michel, L. N. 2017. Isotopic niches of fin whales from the Mediterranean Sea and the Celtic Sea (North Atlantic). *Marine Environmental Research* 127, 75e83.
26. Smith, K. J., Sparks, J. P., Timmons, Z. L., Peterson, M. J. 2020. Cetacean Skeletons Demonstrate Ecologically Relevant Variation in Intraskkeletal Stable Isotopic Values. *Frontiers in Marine Science* 7, 388.
27. Lee, S. H., Schell, D. M., McDonald, T. L., Richardson, W. J. 2005. Regional and seasonal feeding by bowhead whales *Balaena mysticetus* as indicated by stable isotope ratios. *Marine Ecology Progress Series* 285, 271-287.
28. Peterson, B. J., Fry, B. 1987. Stable isotopes in ecosystem studies. *Annual Review of Ecology, Evolution, and Systematics* 18, 293-320.
29. Jory, C., Lesage, V., Leclerc, A., Giard, J., Iverson, S., Bérubé, M., Michaud, R., Nozais, C. 2021. Individual and population dietary specialization decline in fin whales during a period of ecosystem shift. *Scientific Reports* 11:17181.
30. Aguilar, A., Giménez, J., Gómez-Campos, E., Cardona, L., Borrell, A. 2014.  $\delta^{15}\text{N}$  value does not reflect fasting in Mysticetes. *PLoS ONE* 9(3), e92288.
31. Rita, D., Borrell, A., Wodarg, D., Víkingsson, G., García-Vernet, R., Aguilar, A., Loick-Wilde, N. 2023. Amino acid-specific nitrogen stable isotope analysis reveals the trophic behavior of Icelandic fin whales in winter and suggests variable feeding strategies. *Marine Mammal Science* 1-14.
32. Magozzi, S., Yool, A., Vander Zanden, H. B., Wunder, M. B., Trueman, C. N. 2024. Using ocean models to predict spatial and temporal variation in marine carbon isotopes. *Ecosphere* 8(5), e01763.
33. Silva, M. A., Prieto, R., Jonsen, I., Baumgartner, M. F., Santos, R. S. 2013. North Atlantic Blue and Fin Whales Suspend Their Spring Migration to Forage in Middle Latitudes: Building up Energy Reserves for the Journey? *PLoS ONE* 8(10), e76507.
34. Wilson, D. E., Mittermeier, R. A. 2014. *Handbook of the Mammals of the World: Volume 4, Sea Mammals*, Barcelona, Lynx Edicions, 614 p.
35. Borrell, A., Velásquez Vacca, A., Pinela, A. M., Kinze, C., Lockyer, C. H., Vighi, M., Aguilar, A. 2013. Stable Isotopes Provide Insight into Population Structure and Segregation in Eastern North Atlantic Sperm Whales. *PLoS ONE* 8(12), e82398.
36. Pontbriand, T., Davoren, G., Fortune, S., Pomerleau, C., Young, B., Ferguson, S. 2023. Differences in individual bowhead whale *Balaena mysticetus* habitat use, foraging dive depth and diet during the peak feeding season. *Marine Ecology Progress Series* 706, 109-123.
